# Supplementary material for: Relationship between heavy metal exposure and type 2 diabetes: a large-scale retrospective cohort study using occupational health examinations
Source: PubMed Central journal article supplement — BMJ Open. 2021 Mar 4;11(3):e039541. doi: 10.1136/bmjopen-2020-039541 (PMC7934714; doi:10.1136/bmjopen-2020-039541), 2021-03-04
Supplement: bmjopen-2020-039541.draft_revisions.pdf [file bmjopen-2020-039541.draft_revisions.pdf]

# BMJ Open

BMJ Open is committed to open peer review. As part of this commitment we make the peer review history of every article we publish publicly available.

When an article is published we post the peer reviewers' comments and the authors' responses online. We also post the versions of the paper that were used during peer review. These are the versions that the peer review comments apply to.

The versions of the paper that follow are the versions that were submitted during the peer review process. They are not the versions of record or the final published versions. They should not be cited or distributed as the published version of this manuscript.

BMJ Open is an open access journal and the full, final, typeset and author-corrected version of record of the manuscript is available on our site with no access controls, subscription charges or pay-per-view fees (<http://bmjopen.bmj.com>).

If you have any questions on BMJ Open's open peer review process please email [info.bmjopen@bmj.com](mailto:info.bmjopen@bmj.com)

# BMJ Open

## Analyzing the relationship between occupational exposure of heavy metals and diabetes type 2 diabetes in large-scale cohort.

|                               |                                                                                                                                                                                                                                                                                                                                                                                                                                                                            |
|-------------------------------|----------------------------------------------------------------------------------------------------------------------------------------------------------------------------------------------------------------------------------------------------------------------------------------------------------------------------------------------------------------------------------------------------------------------------------------------------------------------------|
| Journal:                      | <i>BMJ Open</i>                                                                                                                                                                                                                                                                                                                                                                                                                                                            |
| Manuscript ID                 | bmjopen-2020-039541                                                                                                                                                                                                                                                                                                                                                                                                                                                        |
| Article Type:                 | Original research                                                                                                                                                                                                                                                                                                                                                                                                                                                          |
| Date Submitted by the Author: | 18-Apr-2020                                                                                                                                                                                                                                                                                                                                                                                                                                                                |
| Complete List of Authors:     | Ji, Jun Ho ; Samsung Changwon Hospital, Internal medicine<br>Jin, Mi Hyeon ; Samsung Changwon Hospital<br>Kang, Jung-Hun ; Gyeongsang National University College of Medicine, Internal Medicine<br>Lee, Soon Il ; Dankook University College of Medicine, Internal Medicine<br>Lee, Suee ; Dong-A University Medical Center, Internal medicine<br>Kim, Sung-Hyun ; Dong-A University Medical Center, Internal Medicine<br>Oh, Sung Yong; Dong-A University Medical Center |
| Keywords:                     | Diabetes & endocrinology < INTERNAL MEDICINE, SOCIAL MEDICINE, EPIDEMIOLOGY                                                                                                                                                                                                                                                                                                                                                                                                |
|                               |                                                                                                                                                                                                                                                                                                                                                                                                                                                                            |

SCHOLARONE™  
Manuscripts

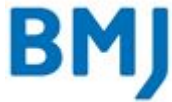

I, the Submitting Author has the right to grant and does grant on behalf of all authors of the Work (as defined in the below author licence), an exclusive licence and/or a non-exclusive licence for contributions from authors who are: i) UK Crown employees; ii) where BMJ has agreed a CC-BY licence shall apply, and/or iii) in accordance with the terms applicable for US Federal Government officers or employees acting as part of their official duties; on a worldwide, perpetual, irrevocable, royalty-free basis to BMJ Publishing Group Ltd ("BMJ") its licensees and where the relevant Journal is co-owned by BMJ to the co-owners of the Journal, to publish the Work in this journal and any other BMJ products and to exploit all rights, as set out in our [licence](#).

The Submitting Author accepts and understands that any supply made under these terms is made by BMJ to the Submitting Author unless you are acting as an employee on behalf of your employer or a postgraduate student of an affiliated institution which is paying any applicable article publishing charge ("APC") for Open Access articles. Where the Submitting Author wishes to make the Work available on an Open Access basis (and intends to pay the relevant APC), the terms of reuse of such Open Access shall be governed by a Creative Commons licence – details of these licences and which [Creative Commons](#) licence will apply to this Work are set out in our licence referred to above.

Other than as permitted in any relevant BMJ Author's Self Archiving Policies, I confirm this Work has not been accepted for publication elsewhere, is not being considered for publication elsewhere and does not duplicate material already published. I confirm all authors consent to publication of this Work and authorise the granting of this licence.

# Analyzing the relationship between occupational exposure of heavy metals and diabetes type 2 diabetes in large-scale cohort.

Jun Ho Ji<sup>1</sup>, Mi Hyeon Jin<sup>2</sup>, Jung-Hun Kang<sup>3</sup>, Soon Il Lee<sup>4</sup>,  
Suee Lee<sup>5</sup>, Sung-Hyun Kim<sup>5</sup>, Sung Yong Oh<sup>5#</sup>

<sup>1</sup>Department of Internal Medicine, Samsung Changwon Hospital, Sungkyunkwan University School of Medicine, Changwon, Korea;

<sup>2</sup>Department of Biostatistics, Samsung Changwon Hospital, Sungkyunkwan University School of Medicine, Changwon, Korea;

<sup>3</sup>Department of Internal Medicine, Gyeongsang National University Scholl of Medicine, Jinju, Korea;

<sup>4</sup>Department of Internal Medicine, Dankook University College of Medicine, Cheonan;

<sup>5</sup>Department of Internal Medicine, Dong-A University College of Medicine, Busan

**Running title:** Relationship between heavy metal exposure and diabetes

**Word count:** 2974

**Corresponding author:** Sung Yong Oh

Address: Department of Internal Medicine, Dong-A University College of Medicine, 26 Daesingongwon-Ro, Seo-Gu, Busan 49201, Korea

Mobile: +82-10-8624-9818

E-mail: drosy@dau.ac.kr

## Abstract

**Objectives:** We investigated the association between heavy-metal exposure and serum ferritin, physical measurements, and type 2 diabetes (DM).

**Design:** Retrospective longitudinal cohort study.

**Setting:** Changwon, the location of the study, is a representative industrial city in Korea. Data was based on the medical checkups at single secondary hospital between 2002 and 2018.

**Participants:** There were included 34,814 subjects; of these, 1,035 with lead exposure were grouped as cohort A, 200 with cadmium exposure as cohort B, and the remaining 33,579 as the control cohort. Data including age, HbA1c, fasting glucose, ferritin, height, weight, follow-up duration, and blood level of heavy metals (lead and cadmium) within one year from exposure were collected.

**Interventions:** Medical data including age, HbA1c, fasting glucose, ferritin, height, weight, follow-up duration, and blood level of heavy metals (lead and cadmium) within one year from exposure were collected.

**Results:** In cohort A, DM was diagnosed in 33 subjects, and 1,002 subjects were not diagnosed with DM; there was a significant difference in lead concentration ( $3.94 \pm 2.92$  versus  $2.81 \pm 2.03$ ,  $p = 0.002$ ) between subjects diagnosed with DM and those without DM during the follow-up period. Simple exposure to lead and cadmium was not found to be associated with DM in Cox regression models (lead exposure, hazard ratio [HR] 1.02 (0.60-1.76),  $p = 0.930$ ; cadmium exposure, HR 1.23 (0.51-2.93)  $p = 0.646$ ). Annual changes in fasting blood glucose according to the concentration of lead at the beginning of exposure showed a weak positive correlation ( $R = 0.072$ ,  $p = 0.032$ ).

**Conclusion:** Our findings demonstrate that simple occupational exposure to lead or cadmium is not associated with prevalence of DM, but lead concentration at the beginning of exposure may be an indicator of DM and glucose elevation.

1  
2  
3  
4 **Keywords:** diabetes, heavy-metal exposure, HbA1c, body mass index, ferritin  
5  
6  
7  
8  
9  
10  
11  
12  
13  
14  
15  
16  
17  
18  
19  
20  
21  
22  
23  
24  
25  
26  
27  
28  
29  
30  
31  
32  
33  
34  
35  
36  
37  
38  
39  
40  
41  
42  
43  
44  
45  
46  
47  
48  
49  
50  
51  
52  
53  
54  
55  
56  
57  
58  
59  
60

For peer review only

**Strengths and limitations of this study**

- This cohort study was conducted on data from mega-sized population.
- It was carried out in one institution in a consistent laboratory test manner with long serial follow up.
- It was retrospective medical data review.
- Because of the possibility of iron deficiency during menstruation, female subjects were excluded, and young subjects who had low incidence of DM were included, mainly because of the occupational characteristics of a workplace with metal exposure.

## Introduction

Diabetes mellitus (DM), a common and rising global problem, is one of the leading causes of death, blindness, and chronic renal failure, and a major risk factor for vascular diseases, such as myocardial infarction, stroke, and peripheral vascular disease. The increase in social costs because of DM-related morbidity or mortality has intensified the efforts to reduce the incidence of DM. The rising incidence of DM is considered to be associated with alterations in lifestyle and other contributing factors, including exposure to several environmental pollutants and industrial chemicals. With the recent, rapid industrial development, exposure levels to various environmental toxic materials have risen alongside DM incidence. These environmental substances causing endocrine disruptions have been defined as endocrine-disrupting chemicals (EDC) by the U.S. Environmental Protection Agency (EPA) [1]. Metals are naturally existing inorganic elements, present in very small amounts in the body, and are essential for vital processes. Heavy metals are generally defined as metals with relatively high densities, atomic weights, or atomic numbers. Heavy metals and metalloids (e.g., lead, mercury, cadmium, and metalloid arsenic) may have hormonal activity, suggesting that these compounds are EDCs as well as more generalized toxicants. These heavy metals have negative effects on physiology and may be associated with the incidence of DM in some populations. In this study, we particularly focused on the association between heavy metals and DM. In recent decades, the environmental exposure of heavy metals has been declining, because industrialization has already occurred, and many countries have begun to pay attention to environmental problems rather than to the development of industry. However, there is the possibility of natural exposures in the environment, such as exposure to heavy metals in older households, exposure through drinking water as in the case of Flint, Michigan, in the United States [2], and exposure because of illegal, unauthorized disposal of toxic materials, including heavy metals from industries. In Korea, occupational exposures are more common than are random environmental exposures. For occupational heavy-metal exposures, there were relatively few studies reporting on whether the degree of exposure is direct or indirect, on changes in the body after exposure, or on the influence of the exposure on specific diseases. A few population-based studies have focused on the association between metal exposure and diabetes, but the existing studies were not consistent [3-9]. Most previous studies have examined the association of DM with heavy-metal concentrations in blood



1  
2  
3  
4 or urine at one specific moment [6, 7]. Intense exposure to heavy metals results in high levels in the  
5  
6 blood or urine, whereas light exposure results in extremely low levels. Therefore, long-term light  
7  
8 exposure to heavy metals leads to low levels of heavy metals in the blood or urine, and heavy metals  
9  
10 deposited in the organs may be harmful. Deposition of heavy metals in the liver and pancreas alters  
11  
12 gluconeogenesis in the liver, and insulin secretion maybe affected as well, eventually influencing the  
13  
14 incidence of DM. Although this study was designed as a retrospective study of long-term occupational  
15  
16 heavy-metal (lead, cadmium) exposure, instead of measuring the concentration of heavy metals in  
17  
18 organs, such as the liver, bone and pancreas, we measured the concentration of heavy metals in the  
19  
20 blood during the beginning of exposure (within 1one year) and compared the changes in fasting glucose,  
21  
22 HbA1c, and incidence of DM with those of the general population who were not exposed to heavy  
23  
24 metals during the same period.  
25  
26  
27  
28  
29  
30  
31  
32  
33  
34  
35  
36  
37  
38  
39  
40  
41  
42  
43  
44  
45  
46  
47  
48  
49  
50  
51  
52  
53  
54  
55  
56  
57  
58  
59  
60

## Material and Methods

### 1) Study population

Changwon, the location of the study, is a representative industrial city in Korea, with many occupations involving heavy-metal exposure, including battery-manufacturing plants. This cohort study was based on data from the general population of 403,253 who underwent medical checkups at Samsung Changwon Hospital between 2002 and 2018. The schematic flow chart for the selection of subjects is shown in Fig 1. All participants underwent a physical exam, blood sampling in the morning following an overnight fast, and filled out a questionnaire. Among the 403,253 subjects, 89,826 who had taken a blood test for ferritin were included, and 38,039 women were excluded. In the occupational screening, most of the women were fertile, and the results of ferritin may be inaccurate because of menstruation. In all, 269 subjects were excluded because of unavailability of HbA1c and fasting blood glucose (FBS) data. Furthermore, 2709 subjects who were already diagnosed with DM were excluded (DM was defined as FBS  $\geq$  126 mg/dl, HbA1c  $\geq$  6.5%, or history of DM in the questionnaire). Additionally, 28,151 subjects were excluded, because only one screening result was available without follow-up data. Finally, 34,814 subjects were included in the analysis. Of these, 1,035 subjects with lead exposure were grouped as cohort A, 200 subjects with cadmium exposure as cohort 2, and the remaining 33,579 as the control group. This study collected subjects' data, including age, HbA1c, FBS, ferritin, height, body weight, follow-up duration, and concentration of heavy metals (lead and cadmium). The study's protocol was approved by the Samsung Changwon Medical Center institutional review board (SCMC-2019-04-014).

### 2) Measurement and collection of lead and cadmium in the blood

For the measurement of lead and cadmium concentrations, 3 ml of blood samples from each subject were collected in vacuum bottles using heparin as the anticoagulant in the morning following an overnight fast. Blood samples were diluted 1:15 and 1:10 for the measurement of lead and cadmium concentrations, respectively, with 2.5 ml of 10% Triton X-100, 0.1 ml of concentrated nitric acid, and 1 ml of 10% ammonium di-hydrogen phosphate as a modifier. Graphite-furnace atomic absorption

1  
2  
3  
4 spectrometry with Zeeman background correction (PinAAcle 9i00z Atomic absorption spectrometer,  
5 PerkinElmer, USA) was used for measuring lead and cadmium levels, which in all subjects were  
6 measured within the first year of heavy-metal exposure.  
7  
8  
9

### 10 3) Statistical analyses

11  
12  
13 Continuous variables are presented as means  $\pm$  standard deviation and categorical variables as the  
14 number of cases and percentage. An independent t-test was used for evaluating the significance of  
15 mean differences between continuous variables for demographical factors, such as age and body mass  
16 index (BMI). Of the baseline characteristics, the Cox proportional hazard model was used to identify  
17 potential predictors of type 2 DM in subjects who were not diagnosed with DM. The exposure levels of  
18 lead and cadmium in consecutive blood tests were set as dependent variables, and FBS and HbA1c  
19 were set as independent variables. The mixed model was used to assess the effects of heavy-metal  
20 exposure and ferritin on FBS and HbA1c, respectively. The annual change of FBS and HbA1c with the  
21 concentration of lead is shown in a scatter plot. Stata 14.0 software (Stata Corporation, College Station,  
22 TX, USA) was used in all statistical analysis.  
23  
24  
25  
26  
27  
28  
29  
30  
31  
32  
33  
34  
35  
36  
37  
38  
39  
40  
41  
42  
43  
44  
45  
46  
47  
48  
49  
50  
51  
52  
53  
54  
55  
56  
57  
58  
59  
60

## Results

### 1) Baseline characteristics of the study

The baseline characteristics of each cohort are shown in Table 1. Of the 34,818 subjects, 1034 were diagnosed with DM during the follow-up, and 33,780 were not diagnosed with DM. In cohort A, which included 1035 lead-exposed subjects, 1,034 were confirmed to have DM, and of the 1,034, 33 were exposed to lead. In the control group without heavy-metal exposure, age, HbA1c, FBS and ferritin were associated with DM, as we already know. In the heavy-metal-exposed subjects, only HbA1c, FBS, and BMI were significantly associated with DM. An interesting aspect in cohort A is that the concentration of the initial lead exposure (within one year) was significantly higher in subjects who were later diagnosed with DM ( $2.81 \pm 2.03$  in non-diabetes and  $3.94 \pm 2.92$  in diabetes,  $p = 0.002$ ). In contrast, early blood levels of cadmium exposure did not differ between the group with subjects progressing to diabetes and that with subjects not progressing to diabetes. The follow-up period was shorter, and the mean age was higher in the subjects progressing to diabetes in both cohorts.

### 2) Risk of developing DM from lead/cadmium exposure and serum ferritin

Cox-regression models showed crude and adjusted hazard ratios of variables predicting the development of DM (Table 2). Age, HbA1c, FBS, BMI, and ferritin were considered to be predictors of developing DM in both crude and adjusted, but simple exposure to lead and cadmium was not associated with DM. Ferritin level had a positive relationship with FBS and HbA1c elevation during the follow-up period in both cohorts A and B (Figure 2-A, 2-D, Figure 3-A, 3-D). The FBS elevation of subjects with simple lead exposure showed a slower pattern than did those without lead exposure (Figure 2-B). However, in HbA1c elevation, simple lead exposure did not have a significant effect (Figure 2-E). The result of the early exposure to cadmium did not differ from that of lead. In cohort B, ferritin also had a significant effect on the rate of elevation of FBS and HbA1c (Figure 3-A, Figure 3-D), and the early exposure to cadmium was positively correlated with the rate of FBS change, but negatively correlated with HbA1c change (Figure 3-B, Figure 3-E).

The unusual finding in both the cohorts was that all subjects were healthy without DM at the time of

1  
2  
3  
4 enrollment, but subjects with elevated ferritin and heavy-metal exposure had higher baseline values of  
5 FBS and HbA1c than did those who did not (Figure 2-C, 2-F Figure 3-C, 3-F).  
6  
7

8 Regarding the concentration of heavy metals, the annual variation of FBS according to the initial  
9 concentration of lead showed a weak but positive correlation. (0.072 of R,  $p = 0.032$ , Figure 4.)  
10  
11  
12  
13  
14  
15  
16  
17  
18  
19  
20  
21  
22  
23  
24  
25  
26  
27  
28  
29  
30  
31  
32  
33  
34  
35  
36  
37  
38  
39  
40  
41  
42  
43  
44  
45  
46  
47  
48  
49  
50  
51  
52  
53  
54  
55  
56  
57  
58  
59  
60

For peer review only

## Discussion

Many studies have attempted to explain the relationship between heavy-metal exposure and hyperglycemia. There are several plausible hypotheses in the background of such research; first, oxidative stress by heavy metals directly damages the beta cells of the pancreas, leading to elevated serum glucose levels [10-17], and this oxidative stress may also increase blood glucose by decreasing insulin release, impairing insulin receptors, disrupting the glucose uptake, increasing hepatic gluconeogenesis and pancreatic glucagon secretion, and decreasing peripheral glucose use [16, 18-22]. Another hypothesis is about competitive inhibition of the toxic metals, which states that essential trace metals at normal levels play a key role in glucose homeostasis, because those are essential cofactors in glucose metabolism, pancreatic beta cell function, and the insulin signaling cascade [18, 19, 23, 24]. Toxic metals compete with these essential metals for various physiological functions and affect type 2 DM risk [25, 26]. It has also been reported that the toxic metals affect various substances, including GLUT4 (glucose transporter type 4), NF- $\kappa$ B (nuclear factor kappa B), MAPK (mitogen-activated protein kinases), and PI3K (phosphoinositide 3-kinase) involved in insulin signaling, thereby increasing the risk of DM [27-31]. The last hypothesis is that exposure to metals, especially heavy metals, increases body weight, as reported by population base studies. Because weight gain is a known risk factor for DM, exposure to heavy metals may be associated with DM [32-36]. Many studies on the relationship between heavy-metal exposure and DM, performed based on these findings, have shown inconsistent results [3-9]. It can be inferred that the direct association between heavy metals and DM has not been confirmed until now and, even if relevant, is very weak. Prior epidemiologic studies that could explain the reported inconsistent results connecting heavy metals to DM had limitations. Most previous studies were based on cross-sectional designs [3-5, 7-9]. A cross-sectional study is characterized by analysis carried out at a specific point in time and does not reflect the change over time. In the case of heavy-metal exposure, chronic long-time exposure is more common than is acute exposure. Therefore, the time of exposure to heavy metals is important, and the elapsed time since the first exposure should be also considered. A Chinese study reported that insulin secretion decreased more in the group exposed to cadmium for more than 10 years than in the group

1  
2  
3  
4 exposed to cadmium for less than 10 years [37]. Next, previous studies were conducted with a case-  
5 control design [3, 9, 38, 39]. As is well known, a small case-control study tends to be less expensive  
6 and is shorter in duration, but it is placed low in the hierarchy of evidence.  
7  
8

9  
10 This study investigated the relationship between serum ferritin, exposure to heavy metals, and DM  
11 during health screening in subjects who worked in battery, paint, and bullet manufacturing facilities,  
12 shipyards, or workplaces requiring welding. Although this study included data from a single institution,  
13 it was designed as a retrospective longitudinal study using a large number of health screening subjects  
14 and overcomes the limitations of prior studies. The following results are reported in the study. (1) Simple  
15 exposure to heavy metals did not increase the risk of developing DM over time, but the concentration  
16 of lead at the time of initial lead exposure was higher in subjects diagnosed with DM later on;  
17  
18

19 (2) Serum ferritin was a predictor of DM as previously reported [40], but serum ferritin was not a predictor  
20 of DM in subjects exposed to lead or cadmium; (3) The high blood lead concentration at the beginning  
21 of lead exposure was proportional to the rate of increase in FBS per year. It is noteworthy that when  
22 the blood lead concentration measured within a year after exposure is high, the rate of FBS rises  
23 gradually with time. A high blood lead concentration means that the lead exposure intensity is strong,  
24 and so the exposure intensity of lead may be a risk factor for DM. This aligns with our other study result,  
25 in which simple exposure to heavy metals is not related to the incidence of DM or the elevation of  
26 FBS/HbA1c. Concentration of heavy metals in our cohort was slightly higher than that of normal Korean  
27 adults in the demographic study on environmental exposure of heavy metals by Kim et al. [41]. This  
28 suggests that our cohort was occupationally exposed to heavy metals, but the intensity was not high  
29 enough to significantly affect the incidence of DM. Similar to our results, a Korean study demonstrated  
30 that low-dose lifetime environmental exposures to lead and cadmium may not affect the incidence of  
31 DM. Another interesting aspect of this study can be observed in Table 1. In the lead- or cadmium-  
32 exposed group, serum ferritin levels in the diabetic group were significantly higher than in the non-  
33 diabetic group, but not in the subjects exposed to lead or cadmium, serum ferritin was lower in the  
34 diabetic group. The reason for these results cannot be explained exactly, but we think that oxidative  
35 stress through the formation of free radicals [12-16,18], which is a mechanism by which heavy metals  
36  
37  
38  
39  
40  
41  
42  
43  
44  
45  
46  
47  
48  
49  
50  
51  
52  
53  
54  
55  
56  
57  
58  
59  
60

1  
2  
3  
4 cause DM, may be the same mechanism behind iron causing DM [42, 43]. Some large-scale U.S  
5  
6 studies have shown that persistent organic pollutants (POPs), which are not heavy metals but are bio-  
7  
8 accumulating as heavy metals are, with chronic environmental exposure becoming a global problem,  
9  
10 pose an increased risk for DM in terms of blood levels [44]. The mechanism by which POPs induce DM  
11  
12 is similar to that in heavy metals [45, 46], and just as for heavy metals, studies on the association of  
13  
14 POPs with DM are discrepant [47-49].  
15

16 The current findings should be interpreted with caution because of several limitations. Since the study  
17  
18 was based on data from subjects undergoing health checkups, we could not identify and analyze risk  
19  
20 factors of DM, including hypertension, family history, and dyslipidemia. The second limitation is that the  
21  
22 concentration of heavy metals in the blood is measured only once at the beginning of exposure. Follow-  
23  
24 up observation, such as diagnosis of DM was done longitudinally, but it did not reflect changes in serum  
25  
26 heavy-metal concentrations as in the cross-sectional study. The limited population of our study cohort  
27  
28 is the next limitation. Because of the possibility of iron deficiency during menstruation, female subjects  
29  
30 were excluded, and young subjects who had low incidence of DM were included, mainly because of the  
31  
32 occupational characteristics of a workplace with metal exposure. In conclusion, our findings  
33  
34 demonstrated that simple exposure to lead or cadmium is not associated with prevalence of DM, but  
35  
36 the blood lead concentration at the beginning of exposure may be an indicator of DM prevalence and  
37  
38 glucose elevation. We suggest that low-dose, chronic occupational exposures to lead or cadmium may  
39  
40 not affect the incidence of DM, but if the exposure intensity is high, screening for DM should be done.  
41  
42  
43  
44  
45  
46  
47  
48  
49  
50  
51  
52  
53  
54  
55  
56  
57  
58  
59  
60



1  
2  
3  
4  
5  
6  
7  
8  
9  
10  
11  
12  
13  
14  
15  
16  
17  
18  
19  
20  
21  
22  
23  
24  
25  
26  
27  
28  
29  
30  
31  
32  
33  
34  
35  
36  
37  
38  
39  
40  
41  
42  
43  
44  
45  
46  
47  
48  
49  
50  
51  
52  
53  
54  
55  
56  
57  
58  
59  
60

**A competing interests statement:** The authors have no conflicts of interest to disclose.

For peer review only

**Authors' contribution:**

Conception or design: JHJ

Acquisition, analysis, or interpretation of data: JHJ

Drafting the work or revising: JHJ,MHJ,JHK,SIL,SL,SHK,SYO

Final approval of the manuscript: JHJ,MHJ,JHK,SIL,SL,SHK,SYO

For peer review only

**A funding statement:** This study was supported by Dong-A University Research fund 2020.

For peer review only

= Figure legends =

**Figure 1.** Schematic flow diagram

**Figure 2.** Mixed models were used to evaluate the effects of lead exposure and ferritin on FBS and HbA1c

A – Changes in fasting blood glucose according to serum ferritin levels in cohort A

B – Changes in fasting blood glucose according to lead exposure in cohort A

C – Changes in fasting blood glucose according to serum ferritin levels and lead exposure in cohort A

D – Changes in HbA1c according to serum ferritin levels in cohort A

E – Changes in HbA1c according to lead exposure in cohort A

F – Changes in HbA1c according to serum ferritin levels and lead exposure in cohort A

**Figure 3.** Mixed models were used to evaluate the effects of cadmium exposure and ferritin on FBS and HbA1c

A – Changes in fasting blood glucose according to serum ferritin levels in cohort B

B – Changes in fasting blood glucose according to lead exposure in cohort B

C – Changes in fasting blood glucose according to serum ferritin levels and lead exposure in cohort B

D – Changes in HbA1c according to serum ferritin levels in cohort B

E – Changes in HbA1c according to lead exposure in cohort B

F – Changes in HbA1c according to serum ferritin levels and lead exposure in cohort B

**Figure 4.** Scatter plot showing the annual changes of FBS by lead concentration ( $R=0.072$ ,  $p = 0.032$ )

1  
2  
3  
4  
5  
6  
7  
8  
9  
10  
11  
12  
13  
14  
15  
16  
17  
18  
19  
20  
21  
22  
23  
24  
25  
26  
27  
28  
29  
30  
31  
32  
33  
34  
35  
36  
37  
38  
39  
40  
41  
42  
43  
44  
45  
46  
47  
48  
49  
50  
51  
52  
53  
54  
55  
56  
57  
58  
59  
60

= Table legends =

**Table1.** Baseline characteristics

**Table2.** Cox regression models: Crude and adjusted HRs of baseline characteristics predicting the development of type 2 diabetes mellitus

For peer review only

1  
2  
3  
4  
5  
6  
7  
8  
9  
10  
11  
12  
13  
14  
15  
16  
17  
18  
19  
20  
21  
22  
23  
24  
25  
26  
27  
28  
29  
30  
31  
32  
33  
34  
35  
36  
37  
38  
39  
40  
41  
42  
43  
44  
45  
46  
47  
48  
49  
50  
51  
52  
53  
54  
55  
56  
57  
58  
59  
60

For peer review only

Table 1. Baseline characteristics

|                                      | Lead (Cohort A)            |                       |         |                           |                    |         |
|--------------------------------------|----------------------------|-----------------------|---------|---------------------------|--------------------|---------|
|                                      | No exposure<br>(n=33,779)  |                       |         | Exposure<br>(n=1,035)     |                    |         |
|                                      | Non diabetes<br>(n=32,778) | Diabetes<br>(n=1,001) | P-value | Non diabetes<br>(n=1,002) | Diabetes<br>(n=33) | P-value |
| Age                                  | 34.99 ± 7.99               | 37.96 ± 8.16          | <0.001  | 32.18 ± 8.36              | 34.19 ± 7.92       | 0.174   |
| HbA1c (%)                            | 5.32 ± 0.30                | 5.76 ± 0.59           | <0.001  | 5.33 ± 0.29               | 5.88 ± 0.81        | <0.001  |
| Fasting blood sugar (mg/dL)          | 89.98 ± 8.65               | 103.49 ± 18.90        | <0.001  | 91.37 ± 9.11              | 114.36 ± 32.71     | <0.001  |
| Ferritin (ng/mL)                     | 145.71 ± 93.76             | 165.55 ± 119.90       | <0.001  | 152.51 ± 99.86            | 139.77 ± 89.57     | 0.470   |
| Body mass index (Kg/m <sup>2</sup> ) | 24.04 ± 3.03               | 25.89 ± 3.54          | <0.001  | 24.04 ± 3.17              | 26.04 ± 2.87       | <0.001  |
| Lead concentration (mg/dL)           | -                          | -                     | -       | 2.81 ± 2.03               | 3.94 ± 2.92        | 0.002   |
| Follow-up duration (year)            | 5.65 ± 3.48                | 5.09 ± 3.67           | <0.001  | 4.78 ± 2.77               | 3.18 ± 3.63        | 0.001   |
|                                      | Cadmium (Cohort B)         |                       |         |                           |                    |         |
|                                      | No exposure<br>(n=34,614)  |                       |         | Exposure<br>(n=200)       |                    |         |
|                                      | Non diabetes<br>(n=33,591) | Diabetes<br>(n=1,023) | P-value | Non diabetes<br>(n=189)   | Diabetes<br>(n=11) | P-value |
| Age                                  | 34.91 ± 8.02               | 37.84 ± 8.19          | <0.001  | 34.77 ± 8.28              | 38.04 ± 7.22       | 0.203   |
| HbA1c (%)                            | 5.32 ± 0.30                | 5.76 ± 0.60           | <0.001  | 5.31 ± 0.31               | 5.65 ± 0.89        | 0.002   |
| Fasting blood sugar (mg/dL)          | 90.01 ± 8.66               | 103.83 ± 19.55        | <0.001  | 91.52 ± 9.43              | 104.00 ± 22.05     | <0.001  |
| Ferritin (ng/mL)                     | 146.03 ± 94.00             | 165.27 ± 119.32       | <0.001  | 124.24 ± 81.76            | 113.93 ± 85.87     | 0.686   |
| Body mass index (Kg/m <sup>2</sup> ) | 24.04 ± 3.04               | 25.88 ± 3.53          | <0.001  | 24.00 ± 3.20              | 26.78 ± 2.67       | 0.005   |
| Cadmium concentration (mg/dL)        | -                          | -                     | -       | 0.20 ± 0.26               | 0.17 ± 0.11        | 0.731   |
| Follow-up duration (year)            | 5.61 ± 3.46                | 5.02 ± 3.67           | <0.001  | 6.96 ± 3.77               | 5.45 ± 4.76        | 0.207   |

**Table 2. Cox regression models: Crude and adjusted HRs of baseline characteristics predicting the development of type 2 diabetes mellitus**

|                                      | Crude            |         | Adjusted         |         |
|--------------------------------------|------------------|---------|------------------|---------|
|                                      | HR (95% CI)      | P-value | HR (95% CI)      | P-value |
| <b>Age</b>                           | 1.05 (1.04-1.06) | <0.001  | 1.02 (1.01-1.03) | 0.001   |
| <b>HbA1c × 10</b>                    | 1.54 (1.51-1.57) | <0.001  | 1.38 (1.34-1.41) | <0.001  |
| <b>Fasting blood sugar</b>           | 1.12 (1.11-1.12) | <0.001  | 1.07 (1.06-1.08) | <0.001  |
| <b>Body mass index</b>               | 1.21 (1.19-1.22) | <0.001  | 1.11 (1.08-1.13) | <0.001  |
| <b>Ferritin (reference: &lt;200)</b> | 2.25 (1.94-2.62) | <0.001  | 1.51 (1.30-1.77) | <0.001  |
| <b>Lead exposure</b>                 | 1.05 (0.68-1.63) | 0.812   | 1.02 (0.60-1.76) | 0.930   |
| <b>Cadmium exposure</b>              | 1.08 (0.54-2.17) | 0.828   | 1.23 (0.51-2.93) | 0.646   |



## References

1. Diamanti-Kandarakis E, Bourguignon JP, Giudice LC, Hauser R, Prins GS, Soto AM, Zoeller RT, Gore AC: **Endocrine-disrupting chemicals: an Endocrine Society scientific statement.** *Endocr Rev* 2009, **30**(4):293-342.
2. Hanna-Attisha M, LaChance J, Sadler RC, Champney Schnepf A: **Elevated Blood Lead Levels in Children Associated With the Flint Drinking Water Crisis: A Spatial Analysis of Risk and Public Health Response.** *Am J Public Health* 2016, **106**(2):283-290.
3. Feng W, Cui X, Liu B, Liu C, Xiao Y, Lu W, Guo H, He M, Zhang X, Yuan J *et al*: **Association of urinary metal profiles with altered glucose levels and diabetes risk: a population-based study in China.** *PloS one* 2015, **10**(4):e0123742.
4. Menke A, Guallar E, Cowie CC: **Metals in Urine and Diabetes in U.S. Adults.** *Diabetes* 2016, **65**(1):164-171.
5. Barregard L, Bergstrom G, Fagerberg B: **Cadmium exposure in relation to insulin production, insulin sensitivity and type 2 diabetes: a cross-sectional and prospective study in women.** *Environmental research* 2013, **121**:104-109.
6. Hansen AF, Simic A, Asvold BO, Romundstad PR, Midthjell K, Syversen T, Flaten TP: **Trace elements in early phase type 2 diabetes mellitus-A population-based study. The HUNT study in Norway.** *J Trace Elem Med Biol* 2017, **40**:46-53.
7. Moon SS: **Association of lead, mercury and cadmium with diabetes in the Korean population: the Korea National Health and Nutrition Examination Survey (KNHANES) 2009-2010.** *Diabet Med* 2013, **30**(4):e143-148.
8. Borne Y, Fagerberg B, Persson M, Sallsten G, Forsgard N, Hedblad B, Barregard L, Engstrom G: **Cadmium exposure and incidence of diabetes mellitus--results from the Malmo Diet and Cancer study.** *PloS one* 2014, **9**(11):e112277.
9. Forte G, Bocca B, Peruzzu A, Tolu F, Asara Y, Farace C, Oggiano R, Madeddu R: **Blood metals concentration in type 1 and type 2 diabetics.** *Biol Trace Elem Res* 2013, **156**(1-3):79-90.
10. Gerber PA, Rutter GA: **The Role of Oxidative Stress and Hypoxia in Pancreatic Beta-Cell Dysfunction in Diabetes Mellitus.** *Antioxid Redox Signal* 2017, **26**(10):501-518.
11. Kaneto H, Katakami N, Kawamori D, Miyatsuka T, Sakamoto K, Matsuoka TA, Matsuhisa M, Yamasaki Y: **Involvement of oxidative stress in the pathogenesis of diabetes.** *Antioxid Redox Signal* 2007, **9**(3):355-366.
12. Kubisch HM, Wang J, Bray TM, Phillips JP: **Targeted overexpression of Cu/Zn superoxide dismutase protects pancreatic beta-cells against oxidative stress.** *Diabetes* 1997, **46**(10):1563-1566.
13. Yen CC, Lu FJ, Huang CF, Chen WK, Liu SH, Lin-Shiau SY: **The diabetogenic effects of the combination of humic acid and arsenic: in vitro and in vivo studies.** *Toxicol Lett* 2007,

- 1  
2  
3  
4  
5  
6  
7  
8  
9  
10  
11  
12  
13  
14  
15  
16  
17  
18  
19  
20  
21  
22  
23  
24  
25  
26  
27  
28  
29  
30  
31  
32  
33  
34  
35  
36  
37  
38  
39  
40  
41  
42  
43  
44  
45  
46  
47  
48  
49  
50  
51  
52  
53  
54  
55  
56  
57  
58  
59  
60
- 172(3):91-105.**
14. Das KK, Das SN, Dhundasi SA: **Nickel, its adverse health effects & oxidative stress.** *Indian J Med Res* 2008, **128(4):412-425.**
15. Izquierdo-Vega JA, Soto CA, Sanchez-Pena LC, De Vizcaya-Ruiz A, Del Razo LM: **Diabetogenic effects and pancreatic oxidative damage in rats subchronically exposed to arsenite.** *Toxicol Lett* 2006, **160(2):135-142.**
16. Valko M, Morris H, Cronin MT: **Metals, toxicity and oxidative stress.** *Curr Med Chem* 2005, **12(10):1161-1208.**
17. Kurata Y, Katsuta O, Doi T, Kawasuso T, Hiratsuka H, Tsuchitani M, Umemura T: **Chronic cadmium treatment induces islet B cell injury in ovariectomized cynomolgus monkeys.** *Jpn J Vet Res* 2003, **50(4):175-183.**
18. Chen YW, Yang CY, Huang CF, Hung DZ, Leung YM, Liu SH: **Heavy metals, islet function and diabetes development.** *Islets* 2009, **1(3):169-176.**
19. Khan AR, Awan FR: **Metals in the pathogenesis of type 2 diabetes.** *J Diabetes Metab Disord* 2014, **13(1):16.**
20. Sharma B, Singh S, Siddiqi NJ: **Biomedical implications of heavy metals induced imbalances in redox systems.** *Biomed Res Int* 2014, **2014:640754.**
21. Beyersmann D, Hartwig A: **Carcinogenic metal compounds: recent insight into molecular and cellular mechanisms.** *Arch Toxicol* 2008, **82(8):493-512.**
22. Kajimoto Y, Matsuoka T, Kaneto H, Watada H, Fujitani Y, Kishimoto M, Sakamoto K, Matsuhisa M, Kawamori R, Yamasaki Y *et al*: **Induction of glycation suppresses glucokinase gene expression in HIT-T15 cells.** *Diabetologia* 1999, **42(12):1417-1424.**
23. Kaur B, Henry J: **Micronutrient status in type 2 diabetes: a review.** *Adv Food Nutr Res* 2014, **71:55-100.**
24. Siddiqui K, Bawazeer N, Joy SS: **Variation in macro and trace elements in progression of type 2 diabetes.** *ScientificWorldJournal* 2014, **2014:461591.**
25. Ahamed M, Siddiqui MK: **Environmental lead toxicity and nutritional factors.** *Clin Nutr* 2007, **26(4):400-408.**
26. Flora SJ: **Structural, chemical and biological aspects of antioxidants for strategies against metal and metalloid exposure.** *Oxid Med Cell Longev* 2009, **2(4):191-206.**
27. Walton FS, Harmon AW, Paul DS, Drobna Z, Patel YM, Styblo M: **Inhibition of insulin-dependent glucose uptake by trivalent arsenicals: possible mechanism of arsenic-induced diabetes.** *Toxicol Appl Pharmacol* 2004, **198(3):424-433.**
28. Han JC, Park SY, Hah BG, Choi GH, Kim YK, Kwon TH, Kim EK, Lachal M, Jung CY, Lee W: **Cadmium induces impaired glucose tolerance in rat by down-regulating GLUT4 expression in adipocytes.** *Arch Biochem Biophys* 2003, **413(2):213-220.**
29. Somwar R, Koterski S, Sweeney G, Sciotti R, Djuric S, Berg C, Trevillyan J, Scherer PE,

- Rondinone CM, Klip A: **A dominant-negative p38 MAPK mutant and novel selective inhibitors of p38 MAPK reduce insulin-stimulated glucose uptake in 3T3-L1 adipocytes without affecting GLUT4 translocation.** *The Journal of biological chemistry* 2002, **277**(52):50386-50395.
30. Souza K, Maddock DA, Zhang Q, Chen J, Chiu C, Mehta S, Wan Y: **Arsenite activation of P13K/AKT cell survival pathway is mediated by p38 in cultured human keratinocytes.** *Molecular medicine* 2001, **7**(11):767-772.
31. Zawalich WS, Zawalich KC: **A link between insulin resistance and hyperinsulinemia: inhibitors of phosphatidylinositol 3-kinase augment glucose-induced insulin secretion from islets of lean, but not obese, rats.** *Endocrinology* 2000, **141**(9):3287-3295.
32. Leasure JL, Giddabasappa A, Chaney S, Johnson JE, Jr., Pothakos K, Lau YS, Fox DA: **Low-level human equivalent gestational lead exposure produces sex-specific motor and coordination abnormalities and late-onset obesity in year-old mice.** *Environmental health perspectives* 2008, **116**(3):355-361.
33. Faulk C, Barks A, Sanchez BN, Zhang Z, Anderson OS, Peterson KE, Dolinoy DC: **Perinatal lead (Pb) exposure results in sex-specific effects on food intake, fat, weight, and insulin response across the murine life-course.** *PloS one* 2014, **9**(8):e104273.
34. Nie X, Wang N, Chen Y, Chen C, Han B, Zhu C, Chen Y, Xia F, Cang Z, Lu M *et al*: **Blood cadmium in Chinese adults and its relationships with diabetes and obesity.** *Environmental science and pollution research international* 2016, **23**(18):18714-18723.
35. Rothenberg SE, Korrnick SA, Fayad R: **The influence of obesity on blood mercury levels for U.S. non-pregnant adults and children: NHANES 2007-2010.** *Environmental research* 2015, **138**:173-180.
36. Padilla MA, Elobeid M, Ruden DM, Allison DB: **An examination of the association of selected toxic metals with total and central obesity indices: NHANES 99-02.** *International journal of environmental research and public health* 2010, **7**(9):3332-3347.
37. Lei LJ, Jin TY, Zhou YF: **[The effects of cadmium on the levels of insulin in smelters].** *Zhonghua Lao Dong Wei Sheng Zhi Ye Bing Za Zhi* 2006, **24**(1):3-6.
38. Serdar MA, Bakir F, Hasimi A, Celik T, Akin O, Kenar L, Aykut O, Yildirimkaya M: **Trace and toxic element patterns in nonsmoker patients with noninsulin-dependent diabetes mellitus, impaired glucose tolerance, and fasting glucose.** *Int J Diabetes Dev Ctries* 2009, **29**(1):35-40.
39. Afridi HI, Kazi TG, Brabazon D, Naher S, Talpur FN: **Comparative metal distribution in scalp hair of Pakistani and Irish referents and diabetes mellitus patients.** *Clin Chim Acta* 2013, **415**:207-214.
40. Jiang R, Manson JE, Meigs JB, Ma J, Rifai N, Hu FB: **Body iron stores in relation to risk of type 2 diabetes in apparently healthy women.** *JAMA* 2004, **291**(6):711-717.

- 1  
2  
3  
4  
5  
6  
7  
8  
9  
10  
11  
12  
13  
14  
15  
16  
17  
18  
19  
20  
21  
22  
23  
24  
25  
26  
27  
28  
29  
30  
31  
32  
33  
34  
35  
36  
37  
38  
39  
40  
41  
42  
43  
44  
45  
46  
47  
48  
49  
50  
51  
52  
53  
54  
55  
56  
57  
58  
59  
60
41. Kim NS, Lee BK: **National estimates of blood lead, cadmium, and mercury levels in the Korean general adult population.** *Int Arch Occup Environ Health* 2011, **84**(1):53-63.
42. Andrews PA: **Disorders of iron metabolism.** *N Engl J Med* 2000, **342**(17):1293; author reply 1294.
43. Oberley LW: **Free radicals and diabetes.** *Free Radic Biol Med* 1988, **5**(2):113-124.
44. Lee DH, Lee IK, Song K, Steffes M, Toscano W, Baker BA, Jacobs DR, Jr.: **A strong dose-response relation between serum concentrations of persistent organic pollutants and diabetes: results from the National Health and Examination Survey 1999-2002.** *Diabetes Care* 2006, **29**(7):1638-1644.
45. Hectors TL, Vanparys C, van der Ven K, Martens GA, Jorens PG, Van Gaal LF, Covaci A, De Coen W, Blust R: **Environmental pollutants and type 2 diabetes: a review of mechanisms that can disrupt beta cell function.** *Diabetologia* 2011, **54**(6):1273-1290.
46. Enan E, Liu PC, Matsumura F: **2,3,7,8-Tetrachlorodibenzo-p-dioxin causes reduction of glucose transporting activities in the plasma membranes of adipose tissue and pancreas from the guinea pig.** *The Journal of biological chemistry* 1992, **267**(28):19785-19791.
47. Longnecker MP, Michalek JE: **Serum dioxin level in relation to diabetes mellitus among Air Force veterans with background levels of exposure.** *Epidemiology* 2000, **11**(1):44-48.
48. Henriksen GL, Ketchum NS, Michalek JE, Swaby JA: **Serum dioxin and diabetes mellitus in veterans of Operation Ranch Hand.** *Epidemiology* 1997, **8**(3):252-258.
49. Steenland K, Piacitelli L, Deddens J, Fingerhut M, Chang LI: **Cancer, heart disease, and diabetes in workers exposed to 2,3,7,8-tetrachlorodibenzo-p-dioxin.** *J Natl Cancer Inst* 1999, **91**(9):779-786.

1  
2  
3  
4  
5  
6  
7  
8  
9  
10  
11  
12  
13  
14  
15  
16  
17  
18  
19  
20  
21  
22  
23  
24  
25  
26  
27  
28  
29  
30  
31  
32  
33  
34  
35  
36  
37  
38  
39  
40  
41  
42  
43  
44  
45  
46  
47  
48  
49  
50  
51  
52  
53  
54  
55  
56  
57  
58  
59  
60

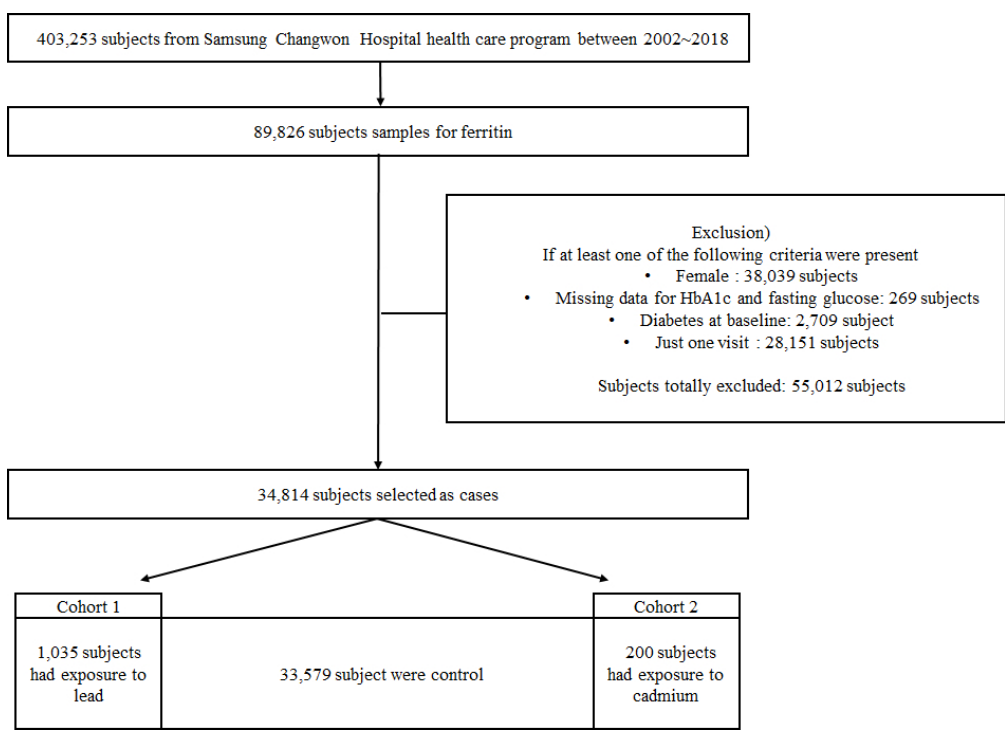

Figure 1. Schematic flow diagram

200x143mm (120 x 120 DPI)

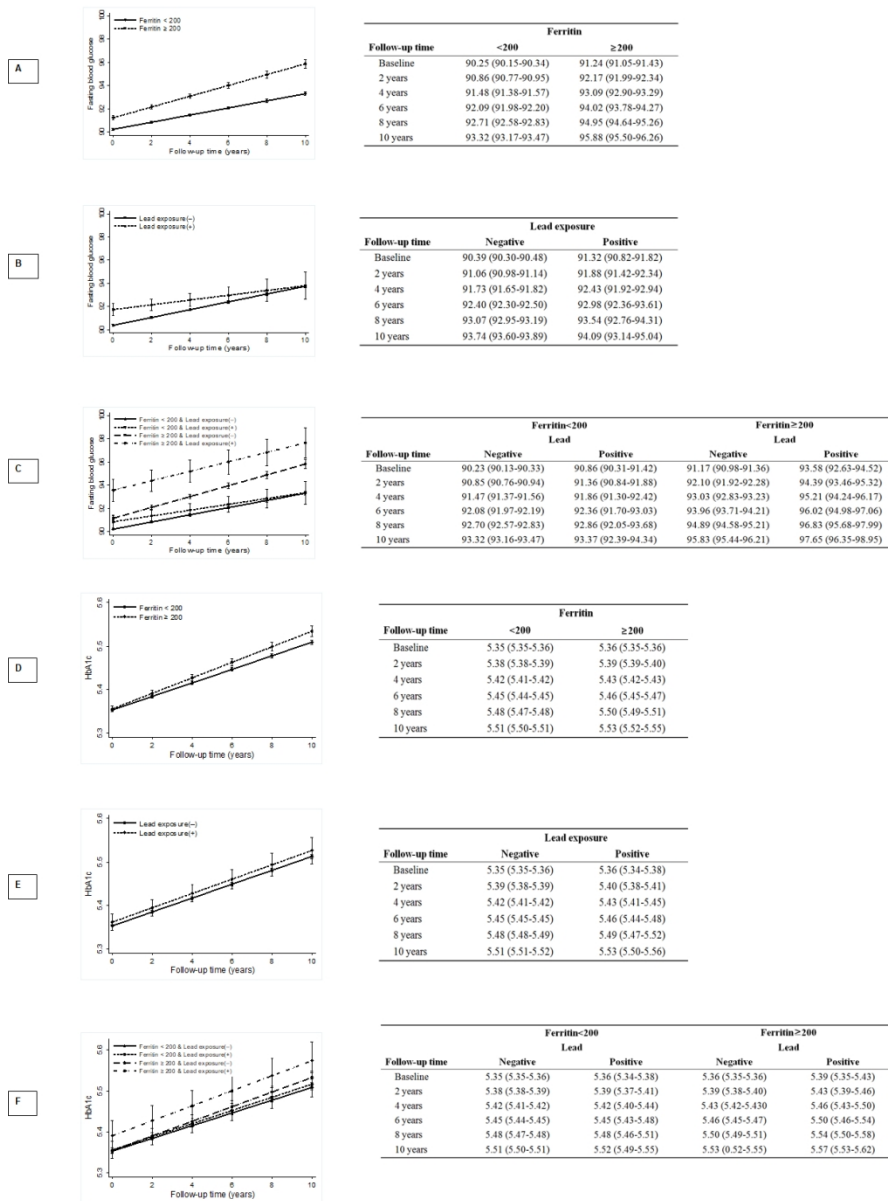

Figure 2. Mixed models were used to evaluate the effects of lead exposure and ferritin on fasting blood glucose and HbA1c in cohort A. (A) Changes in fasting blood glucose according to serum ferritin levels (B) Changes in fasting blood glucose according to lead exposure (C) Changes in fasting blood glucose according to serum ferritin levels and lead exposure (D) Changes in HbA1c according to serum ferritin levels (E) Changes in HbA1c according to lead exposure (F) Changes in HbA1c according to serum ferritin levels and lead exposure

265x355mm (120 x 120 DPI)

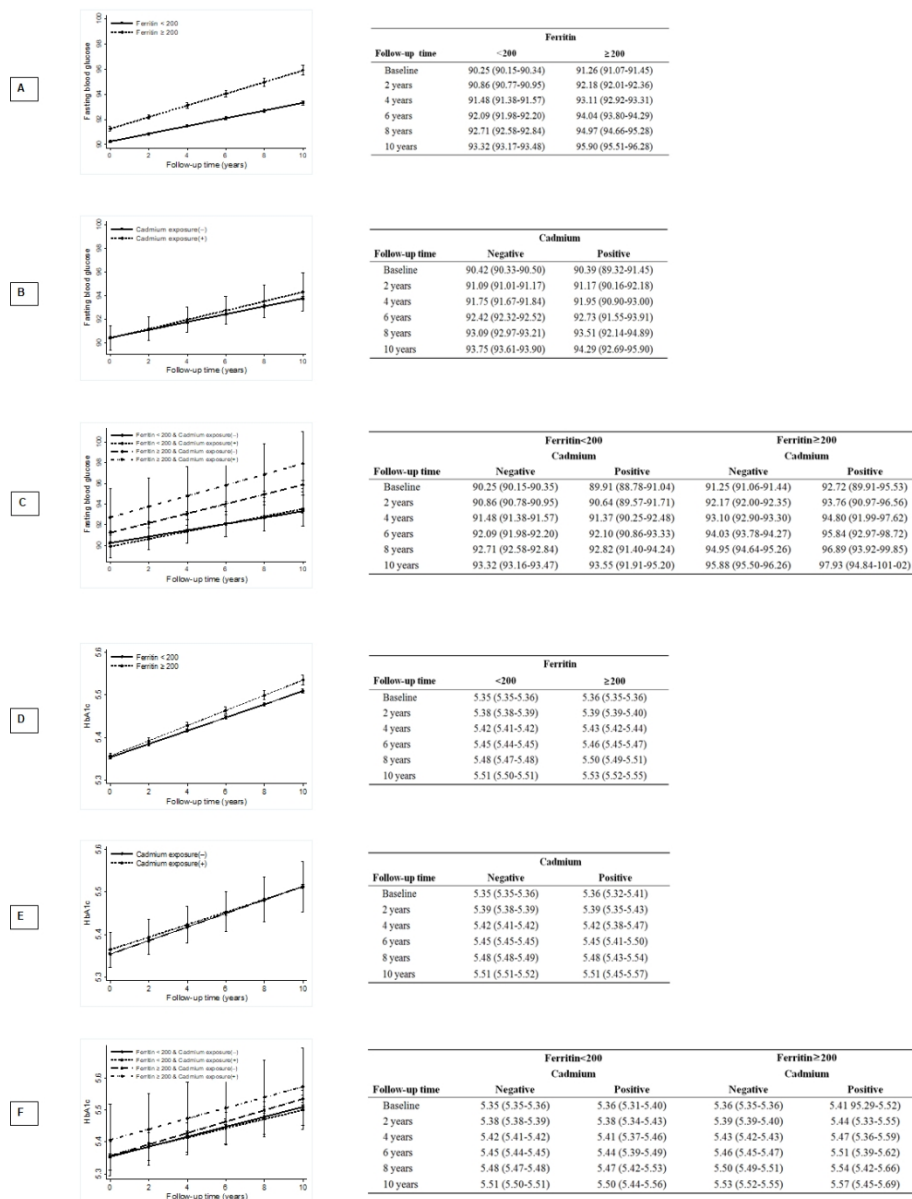

Figure 3. Mixed models were used to evaluate the effects of cadmium exposure and ferritin on fasting blood glucose and HbA1c in cohort B. (A) Changes in fasting blood glucose according to serum ferritin levels (B) Changes in fasting blood glucose according to lead exposure (C) Changes in fasting blood glucose according to serum ferritin levels and lead exposure (D) Changes in HbA1c according to serum ferritin levels (E) Changes in HbA1c according to lead exposure (F) Changes in HbA1c according to serum ferritin levels and lead exposure

238x312mm (120 x 120 DPI)

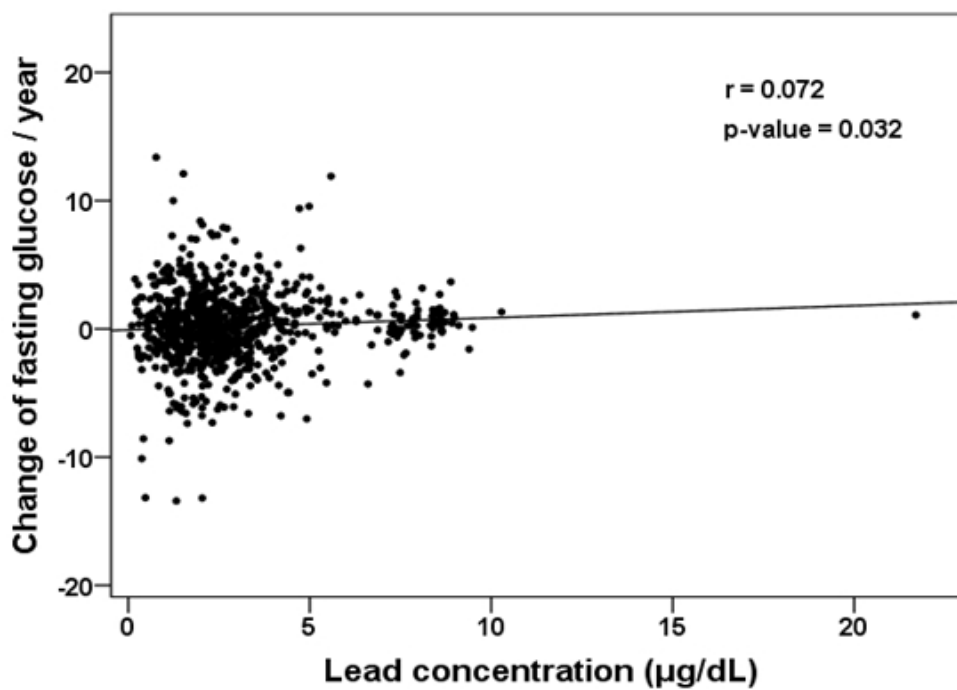

Figure 4. Scatter plot showing the annual changes of FBS by lead concentration ( $R=0.072$ ,  $p = 0.032$ )

118x83mm (120 x 120 DPI)



# Reporting checklist for cohort study.

Based on the STROBE cohort guidelines.

## Instructions to authors

Complete this checklist by entering the page numbers from your manuscript where readers will find each of the items listed below.

Your article may not currently address all the items on the checklist. Please modify your text to include the missing information. If you are certain that an item does not apply, please write "n/a" and provide a short explanation.

Upload your completed checklist as an extra file when you submit to a journal.

In your methods section, say that you used the STROBE cohort reporting guidelines, and cite them as:

von Elm E, Altman DG, Egger M, Pocock SJ, Gøtzsche PC, Vandenbroucke JP. The Strengthening the Reporting of Observational Studies in Epidemiology (STROBE) Statement: guidelines for reporting observational studies.

|                           |                                                                                                        | Page   |
|---------------------------|--------------------------------------------------------------------------------------------------------|--------|
|                           | Reporting Item                                                                                         | Number |
| <b>Title and abstract</b> |                                                                                                        |        |
| Title                     | <a href="#">#1a</a> Indicate the study's design with a commonly used term in the title or the abstract | 1      |

|    |                      |                     |                                                                 |   |
|----|----------------------|---------------------|-----------------------------------------------------------------|---|
| 1  | 1Abstract            | <a href="#">#1b</a> | Provide in the abstract an informative and balanced             | 2 |
| 2  |                      |                     |                                                                 |   |
| 3  |                      |                     |                                                                 |   |
| 4  |                      |                     | summary of what was done and what was found                     |   |
| 5  |                      |                     |                                                                 |   |
| 6  | <b>Introduction</b>  |                     |                                                                 |   |
| 7  |                      |                     |                                                                 |   |
| 8  |                      |                     |                                                                 |   |
| 9  |                      |                     |                                                                 |   |
| 10 | Background /         | <a href="#">#2</a>  | Explain the scientific background and rationale for the         | 5 |
| 11 |                      |                     |                                                                 |   |
| 12 | rationale            |                     | investigation being reported                                    |   |
| 13 |                      |                     |                                                                 |   |
| 14 |                      |                     |                                                                 |   |
| 15 | Objectives           | <a href="#">#3</a>  | State specific objectives, including any prespecified           | 6 |
| 16 |                      |                     |                                                                 |   |
| 17 |                      |                     | hypotheses                                                      |   |
| 18 |                      |                     |                                                                 |   |
| 19 |                      |                     |                                                                 |   |
| 20 | <b>Methods</b>       |                     |                                                                 |   |
| 21 |                      |                     |                                                                 |   |
| 22 |                      |                     |                                                                 |   |
| 23 | Study design         | <a href="#">#4</a>  | Present key elements of study design early in the paper         | 7 |
| 24 |                      |                     |                                                                 |   |
| 25 |                      |                     |                                                                 |   |
| 26 | Setting              | <a href="#">#5</a>  | Describe the setting, locations, and relevant dates, including  | 7 |
| 27 |                      |                     |                                                                 |   |
| 28 |                      |                     | periods of recruitment, exposure, follow-up, and data           |   |
| 29 |                      |                     | collection                                                      |   |
| 30 |                      |                     |                                                                 |   |
| 31 |                      |                     |                                                                 |   |
| 32 |                      |                     |                                                                 |   |
| 33 |                      |                     |                                                                 |   |
| 34 | Eligibility criteria | <a href="#">#6a</a> | Give the eligibility criteria, and the sources and methods of   | 7 |
| 35 |                      |                     |                                                                 |   |
| 36 |                      |                     | selection of participants. Describe methods of follow-up.       |   |
| 37 |                      |                     |                                                                 |   |
| 38 |                      |                     |                                                                 |   |
| 39 | Eligibility criteria | <a href="#">#6b</a> | For matched studies, give matching criteria and number of       | 7 |
| 40 |                      |                     |                                                                 |   |
| 41 |                      |                     | exposed and unexposed                                           |   |
| 42 |                      |                     |                                                                 |   |
| 43 |                      |                     |                                                                 |   |
| 44 |                      |                     |                                                                 |   |
| 45 | Variables            | <a href="#">#7</a>  | Clearly define all outcomes, exposures, predictors, potential   | 7 |
| 46 |                      |                     |                                                                 |   |
| 47 |                      |                     | confounders, and effect modifiers. Give diagnostic criteria, if |   |
| 48 |                      |                     | applicable                                                      |   |
| 49 |                      |                     |                                                                 |   |
| 50 |                      |                     |                                                                 |   |
| 51 |                      |                     |                                                                 |   |
| 52 |                      |                     |                                                                 |   |
| 53 | 8Data sources /      | <a href="#">#8</a>  | For each variable of interest give sources of data and details  | 7 |
| 54 |                      |                     |                                                                 |   |
| 55 | measurement          |                     | of methods of assessment (measurement). Describe                |   |
| 56 |                      |                     |                                                                 |   |
| 57 |                      |                     | comparability of assessment methods if there is more than       |   |
| 58 |                      |                     |                                                                 |   |
| 59 |                      |                     |                                                                 |   |
| 60 |                      |                     |                                                                 |   |

one group. Give information separately for for exposed and unexposed groups if applicable.

|    |                |                      |                                                               |
|----|----------------|----------------------|---------------------------------------------------------------|
| 1  |                |                      |                                                               |
| 2  |                |                      |                                                               |
| 3  |                |                      |                                                               |
| 4  |                |                      |                                                               |
| 5  |                |                      |                                                               |
| 6  | Bias           | <a href="#">#9</a>   | Describe any efforts to address potential sources of bias 7   |
| 7  |                |                      |                                                               |
| 8  |                |                      |                                                               |
| 9  | Study size     | <a href="#">#10</a>  | Explain how the study size was arrived at 7                   |
| 10 |                |                      |                                                               |
| 11 |                |                      |                                                               |
| 12 | Quantitative   | <a href="#">#11</a>  | Explain how quantitative variables were handled in the 7      |
| 13 |                |                      |                                                               |
| 14 | variables      |                      | analyses. If applicable, describe which groupings were        |
| 15 |                |                      |                                                               |
| 16 |                |                      |                                                               |
| 17 |                |                      | chosen, and why                                               |
| 18 |                |                      |                                                               |
| 19 | Statistical    | <a href="#">#12a</a> | Describe all statistical methods, including those used to 8   |
| 20 |                |                      |                                                               |
| 21 | methods        |                      | control for confounding                                       |
| 22 |                |                      |                                                               |
| 23 |                |                      |                                                               |
| 24 |                |                      |                                                               |
| 25 | Statistical    | <a href="#">#12b</a> | Describe any methods used to examine subgroups and 8          |
| 26 |                |                      |                                                               |
| 27 | methods        |                      | interactions                                                  |
| 28 |                |                      |                                                               |
| 29 |                |                      |                                                               |
| 30 | Statistical    | <a href="#">#12c</a> | Explain how missing data were addressed8 NA                   |
| 31 |                |                      |                                                               |
| 32 | methods        |                      |                                                               |
| 33 |                |                      |                                                               |
| 34 |                |                      |                                                               |
| 35 |                |                      |                                                               |
| 36 | Statistical    | <a href="#">#12d</a> | If applicable, explain how loss to follow-up was addressed NA |
| 37 |                |                      |                                                               |
| 38 | methods        |                      |                                                               |
| 39 |                |                      |                                                               |
| 40 |                |                      |                                                               |
| 41 | Statistical    | <a href="#">#12e</a> | Describe any sensitivity analyses 8                           |
| 42 |                |                      |                                                               |
| 43 | methods        |                      |                                                               |
| 44 |                |                      |                                                               |
| 45 |                |                      |                                                               |
| 46 | <b>Results</b> |                      |                                                               |
| 47 |                |                      |                                                               |
| 48 |                |                      |                                                               |
| 49 | Participants   | <a href="#">#13a</a> | Report numbers of individuals at each stage of study—eg 9     |
| 50 |                |                      |                                                               |
| 51 |                |                      | numbers potentially eligible, examined for eligibility,       |
| 52 |                |                      |                                                               |
| 53 |                |                      | confirmed eligible, included in the study, completing follow- |
| 54 |                |                      |                                                               |
| 55 |                |                      |                                                               |
| 56 |                |                      |                                                               |
| 57 |                |                      |                                                               |
| 58 |                |                      |                                                               |
| 59 |                |                      |                                                               |
| 60 |                |                      |                                                               |

up, and analysed. Give information separately for for  
exposed and unexposed groups if applicable.

|                  |                      |                                                                                                                                                                                                                   |    |
|------------------|----------------------|-------------------------------------------------------------------------------------------------------------------------------------------------------------------------------------------------------------------|----|
| Participants     | <a href="#">#13b</a> | Give reasons for non-participation at each stage                                                                                                                                                                  | NA |
| Participants     | <a href="#">#13c</a> | Consider use of a flow diagram                                                                                                                                                                                    | 9  |
| Descriptive data | <a href="#">#14a</a> | Give characteristics of study participants (eg demographic, clinical, social) and information on exposures and potential confounders. Give information separately for exposed and unexposed groups if applicable. | 9  |
| Descriptive data | <a href="#">#14b</a> | Indicate number of participants with missing data for each variable of interest                                                                                                                                   | NA |
| Descriptive data | <a href="#">#14c</a> | Summarise follow-up time (eg, average and total amount)                                                                                                                                                           | 9  |
| Outcome data     | <a href="#">#15</a>  | Report numbers of outcome events or summary measures over time. Give information separately for exposed and unexposed groups if applicable.                                                                       | 9  |
| Main results     | <a href="#">#16a</a> | Give unadjusted estimates and, if applicable, confounder-adjusted estimates and their precision (eg, 95% confidence interval). Make clear which confounders were adjusted for and why they were included          | 9  |
| Main results     | <a href="#">#16b</a> | Report category boundaries when continuous variables were categorized                                                                                                                                             | 9  |
| Main results     | <a href="#">#16c</a> | If relevant, consider translating estimates of relative risk into absolute risk for a meaningful time period                                                                                                      | 9  |

|    |                          |                     |                                                                |       |
|----|--------------------------|---------------------|----------------------------------------------------------------|-------|
| 1  | Other analyses           | <a href="#">#17</a> | Report other analyses done—e.g., analyses of subgroups         | 9-10  |
| 2  |                          |                     | and interactions, and sensitivity analyses                     |       |
| 3  |                          |                     |                                                                |       |
| 4  |                          |                     |                                                                |       |
| 5  |                          |                     |                                                                |       |
| 6  | <b>Discussion</b>        |                     |                                                                |       |
| 7  |                          |                     |                                                                |       |
| 8  |                          |                     |                                                                |       |
| 9  |                          |                     |                                                                |       |
| 10 | Key results              | <a href="#">#18</a> | Summarise key results with reference to study objectives       | 10    |
| 11 |                          |                     |                                                                |       |
| 12 |                          |                     |                                                                |       |
| 13 | Limitations              | <a href="#">#19</a> | Discuss limitations of the study, taking into account sources  | 13    |
| 14 |                          |                     | of potential bias or imprecision. Discuss both direction and   |       |
| 15 |                          |                     | magnitude of any potential bias.                               |       |
| 16 |                          |                     |                                                                |       |
| 17 |                          |                     |                                                                |       |
| 18 |                          |                     |                                                                |       |
| 19 |                          |                     |                                                                |       |
| 20 | Interpretation           | <a href="#">#20</a> | Give a cautious overall interpretation considering objectives, | 13    |
| 21 |                          |                     | limitations, multiplicity of analyses, results from similar    |       |
| 22 |                          |                     | studies, and other relevant evidence.                          |       |
| 23 |                          |                     |                                                                |       |
| 24 |                          |                     |                                                                |       |
| 25 |                          |                     |                                                                |       |
| 26 |                          |                     |                                                                |       |
| 27 |                          |                     |                                                                |       |
| 28 | Generalisability         | <a href="#">#21</a> | Discuss the generalisability (external validity) of the study  | 10-13 |
| 29 |                          |                     | results                                                        |       |
| 30 |                          |                     |                                                                |       |
| 31 |                          |                     |                                                                |       |
| 32 |                          |                     |                                                                |       |
| 33 | <b>Other Information</b> |                     |                                                                |       |
| 34 |                          |                     |                                                                |       |
| 35 |                          |                     |                                                                |       |
| 36 | Funding                  | <a href="#">#22</a> | Give the source of funding and the role of the funders for the | 16    |
| 37 |                          |                     | present study and, if applicable, for the original study on    |       |
| 38 |                          |                     | which the present article is based                             |       |
| 39 |                          |                     |                                                                |       |
| 40 |                          |                     |                                                                |       |
| 41 |                          |                     |                                                                |       |
| 42 |                          |                     |                                                                |       |
| 43 |                          |                     |                                                                |       |

None The STROBE checklist is distributed under the terms of the Creative Commons Attribution License CC-BY. This checklist can be completed online using <https://www.goodreports.org/>, a tool made by the [EQUATOR Network](#) in collaboration with [Penelope.ai](#)

# BMJ Open

## The relationship between heavy metal exposure and type 2 diabetes: A large-scale cohort study

|                                 |                                                                                                                                                                                                                                                                                                                                                                                                                                                                            |
|---------------------------------|----------------------------------------------------------------------------------------------------------------------------------------------------------------------------------------------------------------------------------------------------------------------------------------------------------------------------------------------------------------------------------------------------------------------------------------------------------------------------|
| Journal:                        | <i>BMJ Open</i>                                                                                                                                                                                                                                                                                                                                                                                                                                                            |
| Manuscript ID                   | bmjopen-2020-039541.R1                                                                                                                                                                                                                                                                                                                                                                                                                                                     |
| Article Type:                   | Original research                                                                                                                                                                                                                                                                                                                                                                                                                                                          |
| Date Submitted by the Author:   | 15-Sep-2020                                                                                                                                                                                                                                                                                                                                                                                                                                                                |
| Complete List of Authors:       | Ji, Jun Ho ; Samsung Changwon Hospital, Internal medicine<br>Jin, Mi Hyeon ; Samsung Changwon Hospital<br>Kang, Jung-Hun ; Gyeongsang National University College of Medicine, Internal Medicine<br>Lee, Soon Il ; Dankook University College of Medicine, Internal Medicine<br>Lee, Suee ; Dong-A University Medical Center, Internal medicine<br>Kim, Sung-Hyun ; Dong-A University Medical Center, Internal Medicine<br>Oh, Sung Yong; Dong-A University Medical Center |
| <b>Primary Subject Heading</b>: | Occupational and environmental medicine                                                                                                                                                                                                                                                                                                                                                                                                                                    |
| Secondary Subject Heading:      | Diabetes and endocrinology                                                                                                                                                                                                                                                                                                                                                                                                                                                 |
| Keywords:                       | Diabetes & endocrinology < INTERNAL MEDICINE, SOCIAL MEDICINE, EPIDEMIOLOGY                                                                                                                                                                                                                                                                                                                                                                                                |
|                                 |                                                                                                                                                                                                                                                                                                                                                                                                                                                                            |

SCHOLARONE™  
Manuscripts



I, the Submitting Author has the right to grant and does grant on behalf of all authors of the Work (as defined in the below author licence), an exclusive licence and/or a non-exclusive licence for contributions from authors who are: i) UK Crown employees; ii) where BMJ has agreed a CC-BY licence shall apply, and/or iii) in accordance with the terms applicable for US Federal Government officers or employees acting as part of their official duties; on a worldwide, perpetual, irrevocable, royalty-free basis to BMJ Publishing Group Ltd ("BMJ") its licensees and where the relevant Journal is co-owned by BMJ to the co-owners of the Journal, to publish the Work in this journal and any other BMJ products and to exploit all rights, as set out in our [licence](#).

The Submitting Author accepts and understands that any supply made under these terms is made by BMJ to the Submitting Author unless you are acting as an employee on behalf of your employer or a postgraduate student of an affiliated institution which is paying any applicable article publishing charge ("APC") for Open Access articles. Where the Submitting Author wishes to make the Work available on an Open Access basis (and intends to pay the relevant APC), the terms of reuse of such Open Access shall be governed by a Creative Commons licence – details of these licences and which [Creative Commons](#) licence will apply to this Work are set out in our licence referred to above.

Other than as permitted in any relevant BMJ Author's Self Archiving Policies, I confirm this Work has not been accepted for publication elsewhere, is not being considered for publication elsewhere and does not duplicate material already published. I confirm all authors consent to publication of this Work and authorise the granting of this licence.

# The relationship between heavy metal exposure and type 2 diabetes: A large-scale cohort study

Jun Ho Ji<sup>1</sup>, Mi Hyeon Jin<sup>2</sup>, Jung-Hun Kang<sup>3</sup>, Soon Il Lee<sup>4</sup>,

Suee Lee<sup>5</sup>, Sung-Hyun Kim<sup>5</sup>, Sung Yong Oh<sup>5#</sup>

<sup>1</sup>Department of Internal Medicine, Samsung Changwon Hospital, Sungkyunkwan University School of Medicine, Changwon, Korea;

<sup>2</sup>Department of Biostatistics, Samsung Changwon Hospital, Sungkyunkwan University School of Medicine, Changwon, Korea;

<sup>3</sup>Department of Internal Medicine, Gyeongsang National University School of Medicine, Jinju, Korea;

<sup>4</sup>Department of Internal Medicine, Dankook University College of Medicine, Cheonan;

<sup>5</sup>Department of Internal Medicine, Dong-A University College of Medicine, Busan

**Running title:** Relationship between heavy metal exposure and diabetes

**Word count:** 3489

**Corresponding author:** Sung Yong Oh

Address: Department of Internal Medicine, Dong-A University College of Medicine, 26 Daesingongwon-Ro, Seo-Gu, Busan 49201, Korea

Mobile: +82-10-8624-9818

E-mail: drosy@dau.ac.kr



## 1 Abstract

2 **Objectives:** To investigate associations of heavy-metal exposure with serum ferritin level, physical  
3 measurements, and type 2 diabetes mellitus (DM).

4 **Design:** A retrospective longitudinal cohort study.

5 **Setting:** Changwon, the location of this study, is a representative industrial city in Korea. Data were  
6 obtained from medical checkups between 2002 and 2018.

7 **Participants:** A total of 34,814 male subjects were included. Of them, 1,035 subjects with lead  
8 exposure, 200 subjects with cadmium exposure, and the remaining 33,579 were assigned into cohort  
9 A, cohort B, and control cohort, respectively. Data including personal history of alcohol and smoking,  
10 age, HbA1c, fasting glucose, ferritin, height, weight, follow-up duration, and blood levels of lead and  
11 cadmium within one year after exposure were collected.

12 **Primary outcome measure:** In subjects without diabetes, changes in FBS and HbA1c were analyzed  
13 through repeated tests at intervals of one year or longer after occupational exposure to heavy metals.

14 **Results:** In cohort A, DM was diagnosed in 33 subjects. There was a significant difference in lead  
15 concentration between subjects diagnosed with DM and those without DM during the follow-up period  
16 ( $3.94 \pm 2.92$  mg/dL versus  $2.81 \pm 2.03$  mg/dL,  $p = 0.002$ ). Simple exposure to heavy metals (lead and  
17 cadmium) was not found to be associated with DM in Cox regression models (lead exposure hazard  
18 ratio [HR]: 1.01, 95% CI: 0.58-1.77,  $p = 0.971$ ; cadmium exposure HR: 1.48, 95% CI: 0.61-3.55,  $p =$   
19 0.385). Annual changes in fasting blood glucose according to lead concentration at the beginning of  
20 exposure showed a weak positive correlation ( $r = 0.072$ ,  $p = 0.032$ ).

21 **Conclusion:** Our findings demonstrate that simple occupational exposure to heavy metals of lead and  
22 cadmium is not associated with incidence of DM. However, lead concentration at the beginning of  
23 exposure might be an indicator of DM and glucose elevation.

24  
25 **Keywords:** diabetes, heavy-metal exposure, HbA1c, body mass index, ferritin

## Strengths and limitations of this study

- Limited by single institute data obtained from occupational medical checkup.
- This study was a large-scale study to determine blood concentrations of heavy metals (initial exposure to occupational heavy metal and exposure over a long period of time) and changes in fasting glucose and HbA1c levels.
- The remarkable point of this study is that females are not included. Ferritin is a known risk factor for diabetes and a chronic inflammatory marker. However, due to the demographic nature of occupational health checkup for most women of childbearing age, iron deficiency caused by menstruation can act as a confounding variable.

## 1 Introduction

2 Diabetes mellitus (DM), a common and rising global problem, is one of leading causes of death,  
3 blindness, and chronic renal failure. It is also a major risk factor for vascular diseases such as  
4 myocardial infarction, stroke, and peripheral vascular disease. The increase in social cost because of  
5 DM-related morbidity or mortality has intensified efforts to reduce the incidence of DM. The rising  
6 incidence of DM is considered to be associated with alterations in lifestyles and other contributing  
7 factors, including exposure to several environmental pollutants and industrial chemicals.

8 With rapid industrial development, exposure levels to various environmental toxic materials have  
9 risen along with DM incidence. Environmental substances that cause endocrine disruptions have been  
10 defined as endocrine-disrupting chemicals (EDC) by the U.S. Environmental Protection Agency (EPA)  
11 [1]. Metals are naturally existing inorganic elements that are present in very small amounts in the  
12 body. They are essential for vital processes. Heavy metals are generally defined as metals with  
13 relatively high densities, atomic weights, or atomic numbers. Heavy metals and metalloids (e.g., lead,  
14 mercury, cadmium, and metalloid arsenic) might affect hormonal activity, suggesting that these  
15 compounds are EDCs generalized considered as toxicants. These heavy metals have negative effects  
16 on physiology. They might be associated with the incidence of DM in some populations. In this study,  
17 we particularly focused on the association between exposure to heavy metals and DM. In recent  
18 decades, environmental exposure to heavy metals has been declining because many countries have  
19 begun to pay attention to environmental problems rather than to the development of industry. However,  
20 unintended exposure to heavy metals in the environment such as older households and drinking water  
21 as in the case of Flint, Michigan, USA [2], is still possible. Such exposure can be due to illegal,  
22 unauthorized disposal of toxic materials including heavy metals from industries. In Korea, occupational  
23 exposure to heavy metals is more common than random environmental exposure.

24 For occupational exposure to heavy metals, relatively few studies have reported whether the degree  
25 of exposure has direct or indirect effects on the body or specific diseases. A few population-based  
26 studies have focused on the association between metal exposure and diabetes, showing inconsistent  
27 results [3-9]. Most of previous studies have examined the association of DM with heavy-metal

1 concentrations in blood or urine at one specific moment [6, 7].

2 Intense exposure to heavy metals can result in high levels of heavy metals in blood or urine, whereas  
3 light exposure results in extremely low levels. Although long-term light exposure to heavy metals might  
4 only lead to low levels of heavy metals in blood or urine, heavy metals deposited in organs may be  
5 harmful. Deposition of heavy metals in the liver and pancreas can alter gluconeogenesis in the liver and  
6 affect insulin secretion, eventually influencing the incidence of DM. Although this study was designed  
7 as a retrospective study of long-term occupational exposure to heavy metals (lead and cadmium)  
8 instead of measuring concentration of heavy metals in organs such as the liver, bone, and pancreas,  
9 we measured blood concentrations of heavy metals at the beginning of exposure (within one year) and  
10 compared changes in fasting glucose, HbA1c, and incidence of DM with those of the general population  
11 who were not exposed to heavy metals during the same period.

## 1 **Material and Methods**

### 2 1) Study population

3 Changwon, the location of this study, is a representative industrial city in Korea. It has many occupations  
4 involving heavy-metal exposure, including battery-manufacturing plants. This cohort study was based  
5 on data of the general population (n = 403,253) who underwent medical checkups at Samsung  
6 Changwon Hospital between 2002 and 2018. A schematic flow chart for the selection of subjects is  
7 shown in Fig 1. All participants underwent a physical exam with blood sample taken in the morning  
8 following an overnight fast. They also filled out a questionnaire. Among these 403,253 subjects, 89,826  
9 who had taken a blood test for ferritin were included while 38,039 women were excluded. In  
10 occupational screening, most women were fertile. Results of ferritin might be inaccurate because of  
11 menstruation. A total of 269 subjects were excluded because of unavailability of HbA1c or fasting blood  
12 glucose (FBS) data. Furthermore, 2709 subjects who were already diagnosed with DM were excluded  
13 (DM was defined as FBS  $\geq$  126 mg/dl, HbA1c  $\geq$  6.5%, or history of DM in the questionnaire). Additionally,  
14 28,151 subjects were excluded because they only had one screening result without follow-up data.  
15 Finally, 34,814 subjects were included in the analysis. Of these, 1,035 subjects with lead exposure, 200  
16 subjects with cadmium exposure, and the remaining 33,579 subjects were assigned to cohort A, cohort  
17 B, and control cohort, respectively. This study collected subjects' data including age, HbA1c, FBS,  
18 ferritin, height, body weight, follow-up duration, and concentrations of heavy metals (lead and cadmium).  
19 The study protocol was approved by the Institutional Review Board (IRB) of Samsung Changwon  
20 Medical Center (SCMC-2019-04-014). All participants provided written informed consent for using their  
21 data.

### 22 2) Data collection

23 This study was based on data from occupational health checkups already carried out. Such health  
24 checkup data included numerical objective data such as blood test, imaging test, and physical exam as  
25 well as questionnaire of subjects. The authors used a questionnaire that included several items such  
26 as personal history, physical activity, systemic symptoms, sleep pattern, stress, anxiety, depression,

1 gambling, and job stress. All data were computerized. After obtaining IRB approval, two authors (JHJ  
2 and MHJ) independently analyzed these data.

### 3 3) Measuring blood levels of lead and cadmium

4 To measure blood levels of lead and cadmium, 3 ml of blood was collected from each subject into  
5 vacuum bottles using heparin as an anticoagulant in the morning following an overnight fast. Blood  
6 samples were diluted 1:15 and 1:10 to measurement of lead and cadmium concentrations, respectively,  
7 with 2.5 ml of 10% Triton X-100, 0.1 ml of concentrated nitric acid, and 1 ml of 10% ammonium di-  
8 hydrogen phosphate as a modifier. Graphite-furnace atomic absorption spectrometry with Zeeman  
9 background correction (PinAAcle 9i00z Atomic absorption spectrometer, PerkinElmer, USA) was used  
10 to measure lead and cadmium levels in all subjects within the first year of heavy-metal exposure.

### 11 4) Statistical analyses

12 Continuous variables are presented as means  $\pm$  standard deviation. Categorical variables are  
13 presented as the number of cases and percentage. An independent t-test was used to evaluate the  
14 significance of mean differences between continuous variables for demographical factors such as age  
15 and body mass index (BMI). Cox proportional hazard model was used to identify potential predictors  
16 among baseline characteristics for type 2 DM in subjects who were not diagnosed with DM. Exposure  
17 levels of lead and cadmium in consecutive blood tests were set as independent variables while FBS  
18 and HbA1c levels were set as dependent variables. A mixed model was used to assess effects of heavy-  
19 metal exposure and ferritin on FBS and HbA1c, respectively. Annual changes of FBS and HbA1c with  
20 concentrations of lead are shown in a scatter plot. Stata 14.0 software (Stata Corporation, College  
21 Station, TX, USA) was used for all statistical analyses.

### 22 5) Operational definitions

- 23 1. Type 2 DM – Those who had a history of diabetes diagnosis with anti-diabetic medication or  
24 satisfied ADA (American Diabetes Association) criteria: HbA1c  $\geq$  6.5% or fasting plasma  
25 glucose  $\geq$  126 mg/dl in a blood test after 8-hour fast.

1  
2  
3  
4 1 2. Newly diagnosed diabetes – Among subjects without a history of diabetes who had HbA1c <  
5  
6 2 6.5% and fasting plasma glucose < 100 mg/dl in the first health checkup after joining the  
7  
8 3 company, diabetes was newly diagnosed (HbA1c  $\geq$  6.5% or fasting plasma glucose  $\geq$  126  
9  
10 4 mg/dl) in the follow-up health checkup conducted at least one year apart.

11  
12 5 3. Heavy metal exposure subjects – Subjects with exposure to heavy metals were those who  
13  
14 6 were working in the lead industry, those who were in charge of lead welding and mounting in  
15  
16 7 shipyard, subjects who were working in Ni-Cd battery manufacturing factories.

18  
19 8 6) Patient and Public involvement

20  
21  
22 9 Patient and public were not involved in the development of the research question or the design of the  
23  
24 10 study. No patient and public involved in the recruitment to and conduct of the study. As this study used  
25  
26 11 de-identified results, the authors do not plan to disseminate the study results to study participants  
27  
28 12 separately, but we plan to publish the paper with open access.

29  
30  
31 13  
32  
33  
34  
35  
36  
37  
38  
39  
40  
41  
42  
43  
44  
45  
46  
47  
48  
49  
50  
51  
52  
53  
54  
55  
56  
57  
58  
59  
60

## 1 Results

### 2 1) Baseline characteristics of the study subjects

3 Baseline characteristics of subjects in each cohort are shown in Table 1. Of 34,818 subjects, 1,034  
4 were diagnosed with DM during the follow-up while 33,780 were not diagnosed with DM. In cohort A  
5 (1,035 lead-exposed subjects), 1,034 were confirmed to have DM. Of these 1,034 subjects, 33 were  
6 exposed to lead. In the control group without heavy-metal exposure, age, HbA1c, FBS, and ferritin level  
7 were associated with DM as expected. In heavy-metal exposed subjects, only HbA1c, FBS, and BMI  
8 were significantly associated with DM. An interesting aspect in cohort A was that the concentration of  
9 lead initially (within one year) was significantly higher in subjects who were later diagnosed with DM  
10 ( $2.81 \pm 2.03$  mg/dL in non-diabetes and  $3.94 \pm 2.92$  mg/dL in diabetes,  $p = 0.002$ ). In contrast, early  
11 blood levels of cadmium did not differ between the group of subjects progressing to have DM and those  
12 not progressing to have DM. Drinking and smoking were observed similar to the previous results in  
13 diabetes incidence. Overall, the incidence of diabetes was higher in drinkers than in non-drinkers and  
14 higher in smokers than in ex-smokers or never smokers. However, the total number of subjects exposed  
15 to heavy metals was small, resulting in no statistical significance. The follow-up period was shorter while  
16 the mean age was higher in subjects progressing to have DM in both cohorts. In the lead-exposed  
17 group, the mean follow-up duration was  $3.18 \pm 3.63$  years for the group with DM and  $4.78 \pm 2.77$  years  
18 ( $p = 0.001$ ) for the non-diabetic group. In the cadmium-exposed group, the mean follow-up duration was  
19  $5.45 \pm 4.76$  years for the DM group and  $6.96 \pm 3.77$  years ( $p = 0.207$ ) for the non-diabetic group.

### 20 2) Risk of developing DM from lead/cadmium exposure and serum ferritin

21 Cox-regression models showed crude and adjusted hazard ratios of variables for predicting the  
22 development of DM (Table 2). Age, HbA1c, FBS, BMI, current smoking, and ferritin were predictors for  
23 developing DM in both crude and adjusted models. However, simple exposure to lead or cadmium was  
24 not associated with DM. Ferritin level had a positive relationship with FBS and HbA1c elevation during  
25 the follow-up period in both cohorts A and B (Figures 2-A, 2-B, 3-A, 3-B). FBS elevation in subjects with  
26 simple lead exposure showed a slower pattern than that in those without lead exposure (Figure 2-C).



1  
2  
3  
4 1 However, simple lead exposure did not have a significant effect on HbA1c elevation (Figure 2-D). The  
5  
6 2 result of early exposure to cadmium did not differ from that of early exposure to lead. In cohort B, ferritin  
7  
8 3 also had a significant effect on rates of elevation of FBS and HbA1c (Figure 3-A, Figure 3-B). Early  
9  
10 4 exposure to cadmium was positively correlated with the rate of FBS change, but negatively correlated  
11  
12 5 with HbA1c change (Figures 3-C, 3-D). The unusual finding in both cohorts was that all subjects were  
13  
14 6 healthy without DM at the time of enrollment. However, subjects with elevated ferritin and heavy-metal  
15  
16 7 exposure had higher baseline values of FBS and HbA1c than those who did not (Figures 2-E, 2-F, 3-E,  
17  
18 8 3-F). Regarding concentrations of heavy metals, annual variations of FBS according to initial  
19  
20 9 concentrations of lead showed a weak but positive correlation ( $r = 0.072$ ,  $p = 0.032$ , Figure 4).  
21  
22 10  
23  
24  
25 11  
26  
27  
28  
29  
30  
31  
32  
33  
34  
35  
36  
37  
38  
39  
40  
41  
42  
43  
44  
45  
46  
47  
48  
49  
50  
51  
52  
53  
54  
55  
56  
57  
58  
59  
60

## 1 Discussion

2 Many studies have attempted to explain the relationship between heavy-metal exposure and  
3 hyperglycemia. There are several plausible hypotheses as background of such research. First,  
4 oxidative stress caused by heavy metals can directly damage beta cells of the pancreas, leading to  
5 elevated serum glucose levels [10-17]. Such oxidative stress may also increase blood glucose  
6 levels by decreasing insulin release, impairing insulin receptors, disrupting glucose uptake,  
7 increasing hepatic gluconeogenesis and pancreatic glucagon secretion, and decreasing  
8 peripheral glucose use [16, 18-22]. Another hypothesis is about competitive inhibition of the toxic  
9 metals. It states that essential trace metals at normal levels play a key role in glucose homeostasis  
10 because these metals are essential cofactors for glucose metabolism, pancreatic beta cell function, and  
11 insulin signaling cascade [18, 19, 23, 24]. Toxic metals compete with these essential metals for various  
12 physiological functions and affect type 2 DM risk [25, 26]. It has also been reported that toxic metals  
13 can affect various substances, including glucose transporter type 4, nuclear factor kappa B, mitogen-  
14 activated protein kinases, and phosphoinositide 3-kinase involved in insulin signaling, thereby  
15 increasing the risk of DM [27-31]. The last hypothesis is that exposure to metals, especially heavy  
16 metals, can increase body weight based on population studies. Because weight gain is a known risk  
17 factor for DM, exposure to heavy metals might be associated with DM [32-36]. Many studies on the  
18 relationship between heavy-metal exposure and DM have been performed based on these findings.  
19 However, they show inconsistent results [3-9]. It can be inferred that a direct association between heavy  
20 metals and DM has not been confirmed yet. Even if such association is relevant, it is very weak. Prior  
21 epidemiologic studies that explain reported inconsistent results connecting heavy metals to DM have  
22 limitations. Most previous studies had cross-sectional designs [3-5, 7-9]. A cross-sectional study is  
23 characterized by analysis carried out at a specific point in time. It does not reflect changes over time.  
24 In the case of heavy-metal exposure, chronic long-time exposure is more common than acute exposure.  
25 Therefore, the time of exposure to heavy metals is important. The elapsed time since the first exposure  
26 should be also considered. A Chinese study has reported that insulin secretion is decreased more in  
27 the group exposed to cadmium for more than 10 years than in the group exposed to cadmium for less

1  
2  
3  
4 1 than 10 years [37]. Previous studies have also been conducted with a case-control design [3, 9, 38,  
5  
6 2 39]. It is well-known that a small case-control study tends to be less expensive and shorter in duration.  
7  
8 3 However, it has a low level of evidence.  
9

10 4 This study investigated relationships of serum ferritin level, exposure to heavy metals, and DM during  
11  
12 5 health screening in subjects who worked in battery, paint, and bullet manufacturing facilities, shipyards,  
13  
14 6 or workplaces requiring welding. Although this study included data from a single institution, it was  
15  
16 7 designed as a retrospective longitudinal study using a large number of health screening subjects, thus  
17  
18 8 overcoming limitations of prior studies. The following results were obtained: (1) Simple exposure to  
19  
20 9 heavy metals did not increase the risk of developing DM over time. However, the concentration of lead  
21  
22 10 at the time of initial lead exposure was higher in subjects diagnosed with DM later on; (2) Serum ferritin  
23  
24 11 was a predictor of DM as previously reported [40], However, serum ferritin was not a predictor of DM in  
25  
26 12 subjects exposed to lead or cadmium; (3) High blood concentration of lead at the beginning of lead  
27  
28 13 exposure was proportional to the rate of increase in FBS per year. It was noteworthy that when the  
29  
30 14 blood lead concentration measured within a year after exposure was high, the rate of FBS increased  
31  
32 15 gradually with time. A high blood lead concentration means that lead exposure intensity is strong. Thus,  
33  
34 16 lead exposure intensity might be a risk factor for DM. This aligns with our other study results, in which  
35  
36 17 simple exposure to heavy metals is not related to the incidence of DM or the elevation of FBS/HbA1c.  
37  
38 18 Concentrations of heavy metals in our cohort were slightly higher than those in normal Korean adults  
39  
40 19 based on a demographic study on environmental exposure to heavy metals by Kim et al. [41]. This  
41  
42 20 suggests that our cohort was occupationally exposed to heavy metals. However, their exposure  
43  
44 21 intensity was not high enough to significantly affect the incidence of DM. Similar to our results, a Korean  
45  
46 22 study has demonstrated that low-dose lifetime environmental exposure to lead and cadmium might not  
47  
48 23 affect the incidence of DM. Another interesting aspect of this study can be observed in Table 1. In lead-  
49  
50 24 or cadmium-exposed group, serum ferritin levels in the diabetic group were significantly higher than  
51  
52 25 those in the non-diabetic group, but not in subjects exposed to lead or cadmium (serum ferritin was  
53  
54 26 lower in the diabetic group). The reason for these results cannot be explained exactly. Oxidative stress  
55  
56 27 through the formation of free radicals [12-16,18], a mechanism by which heavy metals cause DM, might  
57  
58 28 be the mechanism involved in the development of DM [42, 43]. Some large-scale US studies have

1  
2  
3  
4 1 shown that high blood levels of persistent organic pollutants (POPs) that are not heavy metals but are  
5  
6 2 bio-accumulating as heavy metals with chronic environmental exposure problem globally, pose an  
7  
8 3 increased risk for DM [44]. The mechanism by which POPs induce DM is similar to that for DM induced  
9  
10 4 by heavy metals [45, 46]. Similar to studies on associations of heavy metals and DM, studies on  
11  
12 5 associations of POPs with DM also show discrepant results [47-49].  
13

14 6 Current findings should be interpreted with caution because of several limitations. Since this study was  
15  
16 7 based on data from subjects undergoing health checkups, we could not identify or analyze risk factors  
17  
18 8 of DM, including hypertension, family history, and dyslipidemia. The second limitation was that blood  
19  
20 9 concentrations of heavy metals were measured only once at the beginning of exposure. Follow-up  
21  
22 10 observation such as diagnosis of DM was done longitudinally without reflecting changes in serum  
23  
24 11 concentrations of heavy metals as in a cross-sectional study. The limited population of our study cohort  
25  
26 12 was another limitation. Because of possible iron deficiency during menstruation, female subjects were  
27  
28 13 excluded. Young subjects who had low incidence of DM were also included mainly because of  
29  
30 14 occupational characteristics of a workplace with metal exposure. Although this study excluded female  
31  
32 15 subjects, it would be interesting to investigate the relationship between occupational heavy metal  
33  
34 16 exposure and diabetes in women. Despite menstruation of iron deficiency, it is a known that serum  
35  
36 17 ferritin is associated with the risk of developing diabetes in fertile women. Thus, further study with female  
37  
38 18 subjects is warranted.  
39

40 19 In conclusion, our findings demonstrate that simple exposure to lead or cadmium is not associated with  
41  
42 20 the prevalence of DM. On the other hand, blood concentration of lead at the beginning of exposure  
43  
44 21 might be an indicator of DM prevalence and glucose elevation. Our results suggest that low-dose,  
45  
46 22 chronic occupational exposure to lead or cadmium may not affect the incidence of DM. However, if the  
47  
48 23 exposure intensity is high, screening for DM should be done.  
49

50 24

51 25  
52  
53  
54  
55  
56  
57  
58  
59  
60

1  
2  
3  
4  
5  
6  
7  
8  
9  
10  
11  
12  
13  
14  
15  
16  
17  
18  
19  
20  
21  
22  
23  
24  
25  
26  
27  
28  
29  
30  
31  
32  
33  
34  
35  
36  
37  
38  
39  
40  
41  
42  
43  
44  
45  
46  
47  
48  
49  
50  
51  
52  
53  
54  
55  
56  
57  
58  
59  
60

1 **A competing interests statement:** The authors have no conflicts of interest to disclose.

2

For peer review only

1  
2  
3  
4 1 **Authors' contribution:**  
5

6  
7 2 Conception or design: JHJ  
8

9 3 Acquisition, analysis, or interpretation of data: JHJ  
10

11 4 Drafting the work or revising: JHJ,MHJ,JHK,SIL,SL,SHK,SYO  
12

13 5 Final approval of the manuscript: JHJ,MHJ,JHK,SIL,SL,SHK,SYO  
14

15 6  
16

17 7  
18

19 8  
20

21 9  
22

23 10  
24  
25  
26  
27  
28  
29  
30  
31  
32  
33  
34  
35  
36  
37  
38  
39  
40  
41  
42  
43  
44  
45  
46  
47  
48  
49  
50  
51  
52  
53  
54  
55  
56  
57  
58  
59  
60

For peer review only

1  
2  
3  
4  
5  
6  
7  
8  
9  
10  
11  
12  
13  
14  
15  
16  
17  
18  
19  
20  
21  
22  
23  
24  
25  
26  
27  
28  
29  
30  
31  
32  
33  
34  
35  
36  
37  
38  
39  
40  
41  
42  
43  
44  
45  
46  
47  
48  
49  
50  
51  
52  
53  
54  
55  
56  
57  
58  
59  
60

1 **A funding statement:** This study was supported by Dong-A University Research fund 2020.

2

3 **Acknowledgements:** Thanks to all the patients who participated in this study.

4

5 **Data availability:** [drosy@dau.ac.kr](mailto:drosy@dau.ac.kr) / [junofanclub@hanmail.net](mailto:junofanclub@hanmail.net). We will response to request including  
6 raw data form of excel file.

7

8

9

10

11

12

13

14

15

16

17

For peer review only

1  
2  
3  
4 = **Figure legends** =  
5

6  
7 **Figure 1.** Schematic flow diagram  
8

9 **Figure 2.** Mixed models were used to evaluate the effects of lead exposure and ferritin on FBS and  
10 HbA1c  
11

12  
13  
14 A – Changes in fasting blood glucose according to serum ferritin levels in cohort A  
15

16 B – Changes in HbA1c according to serum ferritin levels in cohort A  
17

18  
19 C – Changes in fasting blood glucose according to lead exposure in cohort A  
20

21 D – Changes in HbA1c according to lead exposure in cohort A  
22

23  
24 E – Changes in fasting blood glucose according to serum ferritin levels and lead exposure in cohort A  
25

26 F – Changes in HbA1c according to serum ferritin levels and lead exposure in cohort A  
27

28  
29 **Figure 3.** Mixed models were used to evaluate the effects of cadmium exposure and ferritin on FBS  
30 and HbA1c  
31

32  
33  
34 A – Changes in fasting blood glucose according to serum ferritin levels in cohort B  
35

36 B – Changes in HbA1c according to serum ferritin levels in cohort B  
37

38  
39 C – Changes in fasting blood glucose according to lead exposure in cohort B  
40

41 D – Changes in HbA1c according to lead exposure in cohort B  
42

43  
44 E – Changes in fasting blood glucose according to serum ferritin levels and lead exposure in cohort B  
45

46 F – Changes in HbA1c according to serum ferritin levels and lead exposure in cohort B  
47

48  
49 **Figure 4.** Scatter plot showing the annual changes of fasting blood glucose by lead concentration  
50  
51 ( $r=0.072$ ,  $p = 0.032$ )  
52  
53  
54  
55  
56  
57



1  
2  
3  
4  
5  
6  
7  
8  
9  
10  
11  
12  
13  
14  
15  
16  
17  
18  
19  
20  
21  
22  
23  
24  
25  
26  
27  
28  
29  
30  
31  
32  
33  
34  
35  
36  
37  
38  
39  
40  
41  
42  
43  
44  
45  
46  
47  
48  
49  
50  
51  
52  
53  
54  
55  
56  
57  
58  
59  
60

= Table legends =

**Table1.** Baseline characteristics

**Table2.** Cox regression models: Crude and adjusted HRs of baseline characteristics predicting the development of type 2 diabetes mellitus

For peer review only

Table 1. Baseline characteristics

|                                         | Lead (Cohort A)            |                       |         |                           |                    |         |
|-----------------------------------------|----------------------------|-----------------------|---------|---------------------------|--------------------|---------|
|                                         | No exposure<br>(n=33,779)  |                       |         | Exposure<br>(n=1,035)     |                    |         |
|                                         | Non diabetes<br>(n=32,778) | Diabetes<br>(n=1,001) | P-value | Non diabetes<br>(n=1,002) | Diabetes<br>(n=33) | P-value |
| Age                                     | 34.99 ± 7.99               | 37.96 ± 8.16          | <0.001  | 32.18 ± 8.36              | 34.19 ± 7.92       | 0.174   |
| HbA1c (%)                               | 5.32 ± 0.30                | 5.76 ± 0.59           | <0.001  | 5.33 ± 0.29               | 5.88 ± 0.81        | <0.001  |
| Fasting blood sugar<br>(mg/dL)          | 89.98 ± 8.65               | 103.49 ± 18.90        | <0.001  | 91.37 ± 9.11              | 114.36 ± 32.71     | <0.001  |
| Ferritin (ng/mL)                        | 145.71 ± 93.76             | 165.55 ± 119.90       | <0.001  | 152.51 ± 99.86            | 139.77 ± 89.57     | 0.470   |
| Smoking<br>(n=3,727)                    |                            |                       | <0.001  |                           |                    | 0.511   |
| Never smoker                            | 9,716                      | 212                   |         | 367                       | 8                  |         |
| Ex-smoker                               | 6,210                      | 173                   |         | 183                       | 8                  |         |
| Current smoker                          | 12,958                     | 460                   |         | 416                       | 46                 |         |
| Alcohol (n=34,814)                      |                            |                       | 0.003   |                           |                    | 0.620   |
| No                                      | 3,515                      | 137                   |         | 30                        | 0                  |         |
| Yes                                     | 29,263                     | 864                   |         | 972                       | 33                 |         |
| Body mass index<br>(Kg/m <sup>2</sup> ) | 24.04 ± 3.03               | 25.89 ± 3.54          | <0.001  | 24.04 ± 3.17              | 26.04 ± 2.87       | <0.001  |
| Lead concentration<br>(mg/dL)           | -                          | -                     | -       | 2.81 ± 2.03               | 3.94 ± 2.92        | 0.002   |
| Follow-up duration<br>(year)            | 5.65 ± 3.48                | 5.09 ± 3.67           | <0.001  | 4.78 ± 2.77               | 3.18 ± 3.63        | 0.001   |
|                                         | Cadmium (Cohort B)         |                       |         |                           |                    |         |
|                                         | No exposure<br>(n=34,614)  |                       |         | Exposure<br>(n=200)       |                    |         |
|                                         | Non diabetes<br>(n=33,591) | Diabetes<br>(n=1,023) | P-value | Non diabetes<br>(n=189)   | Diabetes<br>(n=11) | P-value |
| Age                                     | 34.91 ± 8.02               | 37.84 ± 8.19          | <0.001  | 34.77 ± 8.28              | 38.04 ± 7.22       | 0.203   |
| HbA1c (%)                               | 5.32 ± 0.30                | 5.76 ± 0.60           | <0.001  | 5.31 ± 0.31               | 5.65 ± 0.89        | 0.002   |
| Fasting blood sugar<br>(mg/dL)          | 90.01 ± 8.66               | 103.83 ± 19.55        | <0.001  | 91.52 ± 9.43              | 104.00 ± 22.05     | <0.001  |
| Ferritin (ng/mL)                        | 146.03 ± 94.00             | 165.27 ± 119.32       | <0.001  | 124.24 ± 81.76            | 113.93 ± 85.87     | 0.686   |
| Smoking<br>(n=3,727)                    |                            |                       | <0.001  |                           |                    | 0.033   |
| Never smoker                            | 10,002                     | 219                   |         | 81                        | 1                  |         |
| Ex-smoker                               | 6,359                      | 177                   |         | 34                        | 4                  |         |
| Current smoker                          | 13,308                     | 470                   |         | 66                        | 6                  |         |
| Alcohol (n=34,814)                      |                            |                       | 0.004   |                           |                    | >0.999  |
| No                                      | 3,540                      | 137                   |         | 5                         | 0                  |         |
| Yes                                     | 30,051                     | 886                   |         | 184                       | 11                 |         |
| Body mass index<br>(Kg/m <sup>2</sup> ) | 24.04 ± 3.04               | 25.88 ± 3.53          | <0.001  | 24.00 ± 3.20              | 26.78 ± 2.67       | 0.005   |
| Cadmium<br>concentration<br>(mg/dL)     | -                          | -                     | -       | 0.20 ± 0.26               | 0.17 ± 0.11        | 0.731   |
| Follow-up duration<br>(year)            | 5.61 ± 3.46                | 5.02 ± 3.67           | <0.001  | 6.96 ± 3.77               | 5.45 ± 4.76        | 0.207   |

1

**Table 2. Cox regression models: Crude and adjusted HRs of baseline characteristics predicting the development of type 2 diabetes mellitus**

|                                             | Crude            |         | Adjusted<br>(N=30,589) |         |
|---------------------------------------------|------------------|---------|------------------------|---------|
|                                             | HR (95% CI)      | P-value | HR (95% CI)            | P-value |
| <b>Age (year)</b>                           | 1.05 (1.04-1.06) | <0.001  | 1.01 (1.00-1.03)       | 0.012   |
| <b>HbA1c (%) × 10</b>                       | 1.54 (1.51-1.57) | <0.001  | 1.35 (1.32-1.39)       | <0.001  |
| <b>Fasting blood sugar (mg/dL)</b>          | 1.12 (1.11-1.12) | <0.001  | 1.07 (1.06-1.08)       | <0.001  |
| <b>Body mass index (Kg/m<sup>2</sup>)</b>   | 1.21 (1.19-1.22) | <0.001  | 1.10 (0.078-1.12)      | <0.001  |
| <b>Ferritin (ng/mL, reference: &lt;200)</b> | 2.25 (1.94-2.62) | <0.001  | 1.51 (1.28-1.79)       | <0.001  |
| <b>Lead exposure</b>                        | 1.05 (0.68-1.63) | 0.812   | 1.01 (0.58-1.77)       | 0.971   |
| <b>Cadmium exposure</b>                     | 1.08 (0.54-2.17) | 0.828   | 1.48 (0.61-3.55)       | 0.385   |
| <b>Smoking</b>                              |                  |         |                        |         |
| Ex-smoker                                   | 1.22 (0.98-1.51) | 0.071   | 1.05 (0.85-1.31)       | 0.634   |
| Current smoker                              | 1.61 (1.35-1.92) | <0.001  | 1.45 (1.22-1.73)       | <0.01   |
| <b>Drinking</b>                             | 0.83 (0.68-1.01) | 0.062   | 1.07 (0.53-2.17)       | 0.842   |

1

2

3

4

## References

1. Diamanti-Kandarakis E, Bourguignon JP, Giudice LC, Hauser R, Prins GS, Soto AM, Zoeller RT, Gore AC: **Endocrine-disrupting chemicals: an Endocrine Society scientific statement.** *Endocr Rev* 2009, **30**(4):293-342.
2. Hanna-Attisha M, LaChance J, Sadler RC, Champney Schnepf A: **Elevated Blood Lead Levels in Children Associated With the Flint Drinking Water Crisis: A Spatial Analysis of Risk and Public Health Response.** *Am J Public Health* 2016, **106**(2):283-290.
3. Feng W, Cui X, Liu B, Liu C, Xiao Y, Lu W, Guo H, He M, Zhang X, Yuan J *et al*: **Association of urinary metal profiles with altered glucose levels and diabetes risk: a population-based study in China.** *PloS one* 2015, **10**(4):e0123742.
4. Menke A, Guallar E, Cowie CC: **Metals in Urine and Diabetes in U.S. Adults.** *Diabetes* 2016, **65**(1):164-171.
5. Barregard L, Bergstrom G, Fagerberg B: **Cadmium exposure in relation to insulin production, insulin sensitivity and type 2 diabetes: a cross-sectional and prospective study in women.** *Environmental research* 2013, **121**:104-109.
6. Hansen AF, Simic A, Asvold BO, Romundstad PR, Midthjell K, Syversen T, Flaten TP: **Trace elements in early phase type 2 diabetes mellitus-A population-based study. The HUNT study in Norway.** *J Trace Elem Med Biol* 2017, **40**:46-53.
7. Moon SS: **Association of lead, mercury and cadmium with diabetes in the Korean population: the Korea National Health and Nutrition Examination Survey (KNHANES) 2009-2010.** *Diabet Med* 2013, **30**(4):e143-148.
8. Borne Y, Fagerberg B, Persson M, Sallsten G, Forsgard N, Hedblad B, Barregard L, Engstrom G: **Cadmium exposure and incidence of diabetes mellitus--results from the Malmo Diet and Cancer study.** *PloS one* 2014, **9**(11):e112277.
9. Forte G, Bocca B, Peruzzu A, Tolu F, Asara Y, Farace C, Oggiano R, Madeddu R: **Blood metals concentration in type 1 and type 2 diabetics.** *Biol Trace Elem Res* 2013, **156**(1-3):79-90.
10. Gerber PA, Rutter GA: **The Role of Oxidative Stress and Hypoxia in Pancreatic Beta-Cell Dysfunction in Diabetes Mellitus.** *Antioxid Redox Signal* 2017, **26**(10):501-518.
11. Kaneto H, Katakami N, Kawamori D, Miyatsuka T, Sakamoto K, Matsuoka TA, Matsuhisa M, Yamasaki Y: **Involvement of oxidative stress in the pathogenesis of diabetes.** *Antioxid Redox Signal* 2007, **9**(3):355-366.
12. Kubisch HM, Wang J, Bray TM, Phillips JP: **Targeted overexpression of Cu/Zn superoxide dismutase protects pancreatic beta-cells against oxidative stress.** *Diabetes* 1997, **46**(10):1563-1566.
13. Yen CC, Lu FJ, Huang CF, Chen WK, Liu SH, Lin-Shiau SY: **The diabetogenic effects of the combination of humic acid and arsenic: in vitro and in vivo studies.** *Toxicol Lett* 2007,

- 1  
2  
3  
4  
5 1 **172(3):91-105.**
- 6 2 14. Das KK, Das SN, Dhundasi SA: **Nickel, its adverse health effects & oxidative stress.** *Indian*  
7 3 *J Med Res* 2008, **128(4):412-425.**
- 8  
9 4 15. Izquierdo-Vega JA, Soto CA, Sanchez-Pena LC, De Vizcaya-Ruiz A, Del Razo LM:  
10 5 **Diabetogenic effects and pancreatic oxidative damage in rats subchronically exposed**  
11 6 **to arsenite.** *Toxicol Lett* 2006, **160(2):135-142.**
- 12  
13 7 16. Valko M, Morris H, Cronin MT: **Metals, toxicity and oxidative stress.** *Curr Med Chem* 2005,  
14 8 **12(10):1161-1208.**
- 15  
16 9 17. Kurata Y, Katsuta O, Doi T, Kawasuso T, Hiratsuka H, Tsuchitani M, Umemura T: **Chronic**  
17 10 **cadmium treatment induces islet B cell injury in ovariectomized cynomolgus monkeys.**  
18 11 *Jpn J Vet Res* 2003, **50(4):175-183.**
- 19  
20 12 18. Chen YW, Yang CY, Huang CF, Hung DZ, Leung YM, Liu SH: **Heavy metals, islet function**  
21 13 **and diabetes development.** *Islets* 2009, **1(3):169-176.**
- 22  
23 14 19. Khan AR, Awan FR: **Metals in the pathogenesis of type 2 diabetes.** *J Diabetes Metab*  
24 15 *Disord* 2014, **13(1):16.**
- 25  
26 16 20. Sharma B, Singh S, Siddiqi NJ: **Biomedical implications of heavy metals induced**  
27 17 **imbalances in redox systems.** *Biomed Res Int* 2014, **2014:640754.**
- 28  
29 18 21. Beyersmann D, Hartwig A: **Carcinogenic metal compounds: recent insight into molecular**  
30 19 **and cellular mechanisms.** *Arch Toxicol* 2008, **82(8):493-512.**
- 31  
32 20 22. Kajimoto Y, Matsuoka T, Kaneto H, Watada H, Fujitani Y, Kishimoto M, Sakamoto K,  
33 21 Matsuoka M, Kawamori R, Yamasaki Y *et al*: **Induction of glycation suppresses glucokinase**  
34 22 **gene expression in HIT-T15 cells.** *Diabetologia* 1999, **42(12):1417-1424.**
- 35  
36 23 23. Kaur B, Henry J: **Micronutrient status in type 2 diabetes: a review.** *Adv Food Nutr Res*  
37 24 2014, **71:55-100.**
- 38  
39 25 24. Siddiqui K, Bawazeer N, Joy SS: **Variation in macro and trace elements in progression of**  
40 26 **type 2 diabetes.** *ScientificWorldJournal* 2014, **2014:461591.**
- 41  
42 27 25. Ahamed M, Siddiqui MK: **Environmental lead toxicity and nutritional factors.** *Clin Nutr*  
43 28 2007, **26(4):400-408.**
- 44  
45 29 26. Flora SJ: **Structural, chemical and biological aspects of antioxidants for strategies against**  
46 30 **metal and metalloid exposure.** *Oxid Med Cell Longev* 2009, **2(4):191-206.**
- 47  
48 31 27. Walton FS, Harmon AW, Paul DS, Drobna Z, Patel YM, Styblo M: **Inhibition of insulin-**  
49 32 **dependent glucose uptake by trivalent arsenicals: possible mechanism of arsenic-**  
50 33 **induced diabetes.** *Toxicol Appl Pharmacol* 2004, **198(3):424-433.**
- 51  
52 34 28. Han JC, Park SY, Hah BG, Choi GH, Kim YK, Kwon TH, Kim EK, Lachal M, Jung CY, Lee W:  
53 35 **Cadmium induces impaired glucose tolerance in rat by down-regulating GLUT4**  
54 36 **expression in adipocytes.** *Arch Biochem Biophys* 2003, **413(2):213-220.**
- 55  
56 37 29. Somwar R, Koterski S, Sweeney G, Sciotti R, Djuric S, Berg C, Trevillyan J, Scherer PE,

- 1  
2  
3  
4  
5 1 Rondinone CM, Klip A: **A dominant-negative p38 MAPK mutant and novel selective**  
6 2 **inhibitors of p38 MAPK reduce insulin-stimulated glucose uptake in 3T3-L1 adipocytes**  
7 3 **without affecting GLUT4 translocation.** *The Journal of biological chemistry* 2002,  
8 4 **277(52):50386-50395.**
- 9 5 30. Souza K, Maddock DA, Zhang Q, Chen J, Chiu C, Mehta S, Wan Y: **Arsenite activation of**  
11 6 **P13K/AKT cell survival pathway is mediated by p38 in cultured human keratinocytes.**  
12 7 *Molecular medicine* 2001, **7(11):767-772.**
- 13 8 31. Zawalich WS, Zawalich KC: **A link between insulin resistance and hyperinsulinemia:**  
14 9 **inhibitors of phosphatidylinositol 3-kinase augment glucose-induced insulin secretion**  
15 10 **from islets of lean, but not obese, rats.** *Endocrinology* 2000, **141(9):3287-3295.**
- 16 11 32. Leasure JL, Giddabasappa A, Chaney S, Johnson JE, Jr., Pothakos K, Lau YS, Fox DA: **Low-**  
17 12 **level human equivalent gestational lead exposure produces sex-specific motor and**  
18 13 **coordination abnormalities and late-onset obesity in year-old mice.** *Environmental health*  
19 14 *perspectives* 2008, **116(3):355-361.**
- 20 15 33. Faulk C, Barks A, Sanchez BN, Zhang Z, Anderson OS, Peterson KE, Dolinoy DC: **Perinatal**  
21 16 **lead (Pb) exposure results in sex-specific effects on food intake, fat, weight, and insulin**  
22 17 **response across the murine life-course.** *PloS one* 2014, **9(8):e104273.**
- 23 18 34. Nie X, Wang N, Chen Y, Chen C, Han B, Zhu C, Chen Y, Xia F, Cang Z, Lu M *et al*: **Blood**  
24 19 **cadmium in Chinese adults and its relationships with diabetes and obesity.**  
25 20 *Environmental science and pollution research international* 2016, **23(18):18714-18723.**
- 26 21 35. Rothenberg SE, Korrnick SA, Fayad R: **The influence of obesity on blood mercury levels for**  
27 22 **U.S. non-pregnant adults and children: NHANES 2007-2010.** *Environmental research* 2015,  
28 23 **138:173-180.**
- 29 24 36. Padilla MA, Elobeid M, Ruden DM, Allison DB: **An examination of the association of**  
30 25 **selected toxic metals with total and central obesity indices: NHANES 99-02.** *International*  
31 26 *journal of environmental research and public health* 2010, **7(9):3332-3347.**
- 32 27 37. Lei LJ, Jin TY, Zhou YF: **[The effects of cadmium on the levels of insulin in smelters].**  
33 28 *Zhonghua Lao Dong Wei Sheng Zhi Ye Bing Za Zhi* 2006, **24(1):3-6.**
- 34 29 38. Serdar MA, Bakir F, Hasimi A, Celik T, Akin O, Kenar L, Aykut O, Yildirimkaya M: **Trace and**  
35 30 **toxic element patterns in nonsmoker patients with noninsulin-dependent diabetes**  
36 31 **mellitus, impaired glucose tolerance, and fasting glucose.** *Int J Diabetes Dev Ctries* 2009,  
37 32 **29(1):35-40.**
- 38 33 39. Afridi HI, Kazi TG, Brabazon D, Naher S, Talpur FN: **Comparative metal distribution in scalp**  
39 34 **hair of Pakistani and Irish referents and diabetes mellitus patients.** *Clin Chim Acta* 2013,  
40 35 **415:207-214.**
- 41 36 40. Jiang R, Manson JE, Meigs JB, Ma J, Rifai N, Hu FB: **Body iron stores in relation to risk of**  
42 37 **type 2 diabetes in apparently healthy women.** *JAMA* 2004, **291(6):711-717.**

- 1  
2  
3  
4  
5 1 41. Kim NS, Lee BK: **National estimates of blood lead, cadmium, and mercury levels in the**  
6 2 **Korean general adult population.** *Int Arch Occup Environ Health* 2011, **84**(1):53-63.  
7 3 42. Andrews PA: **Disorders of iron metabolism.** *N Engl J Med* 2000, **342**(17):1293; author reply  
8 4 1294.  
9 5 43. Oberley LW: **Free radicals and diabetes.** *Free Radic Biol Med* 1988, **5**(2):113-124.  
10 6 44. Lee DH, Lee IK, Song K, Steffes M, Toscano W, Baker BA, Jacobs DR, Jr.: **A strong dose-**  
11 7 **response relation between serum concentrations of persistent organic pollutants and**  
12 8 **diabetes: results from the National Health and Examination Survey 1999-2002.** *Diabetes*  
13 9 *Care* 2006, **29**(7):1638-1644.  
14 10 45. Hectors TL, Vanparys C, van der Ven K, Martens GA, Jorens PG, Van Gaal LF, Covaci A, De  
15 11 Coen W, Blust R: **Environmental pollutants and type 2 diabetes: a review of mechanisms**  
16 12 **that can disrupt beta cell function.** *Diabetologia* 2011, **54**(6):1273-1290.  
17 13 46. Enan E, Liu PC, Matsumura F: **2,3,7,8-Tetrachlorodibenzo-p-dioxin causes reduction of**  
18 14 **glucose transporting activities in the plasma membranes of adipose tissue and pancreas**  
19 15 **from the guinea pig.** *The Journal of biological chemistry* 1992, **267**(28):19785-19791.  
20 16 47. Longnecker MP, Michalek JE: **Serum dioxin level in relation to diabetes mellitus among**  
21 17 **Air Force veterans with background levels of exposure.** *Epidemiology* 2000, **11**(1):44-48.  
22 18 48. Henriksen GL, Ketchum NS, Michalek JE, Swaby JA: **Serum dioxin and diabetes mellitus in**  
23 19 **veterans of Operation Ranch Hand.** *Epidemiology* 1997, **8**(3):252-258.  
24 20 49. Steenland K, Piacitelli L, Deddens J, Fingerhut M, Chang LI: **Cancer, heart disease, and**  
25 21 **diabetes in workers exposed to 2,3,7,8-tetrachlorodibenzo-p-dioxin.** *J Natl Cancer Inst*  
26 22 1999, **91**(9):779-786.  
27  
28  
29  
30  
31  
32  
33  
34  
35  
36  
37  
38  
39  
40  
41  
42  
43  
44  
45  
46  
47  
48  
49  
50  
51  
52  
53  
54  
55  
56  
57  
58  
59  
60

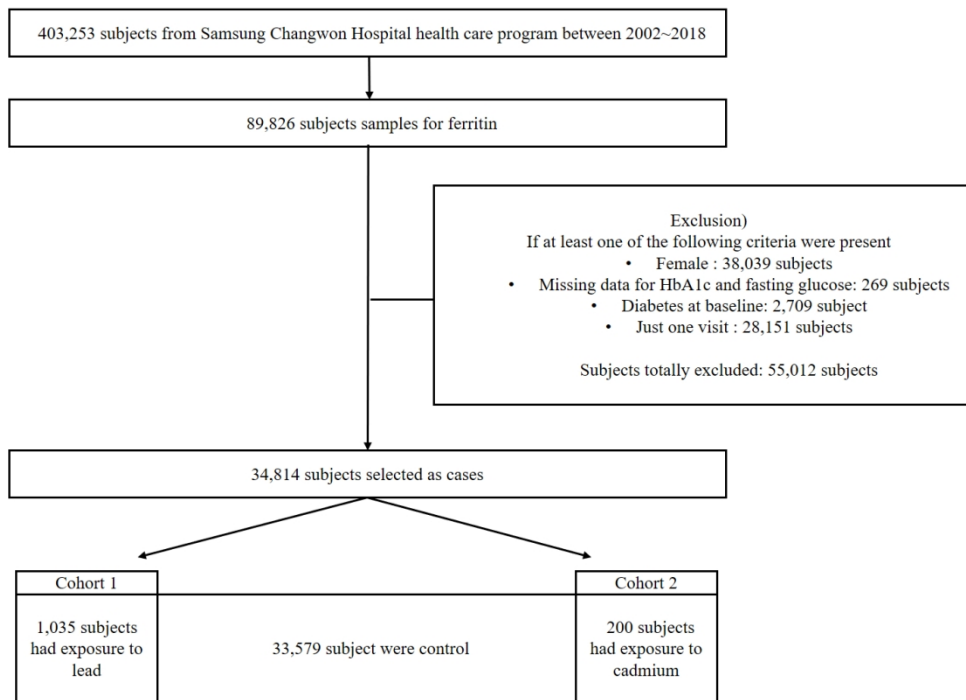

Figure 1. Schematic flow diagram

124x89mm (300 x 300 DPI)



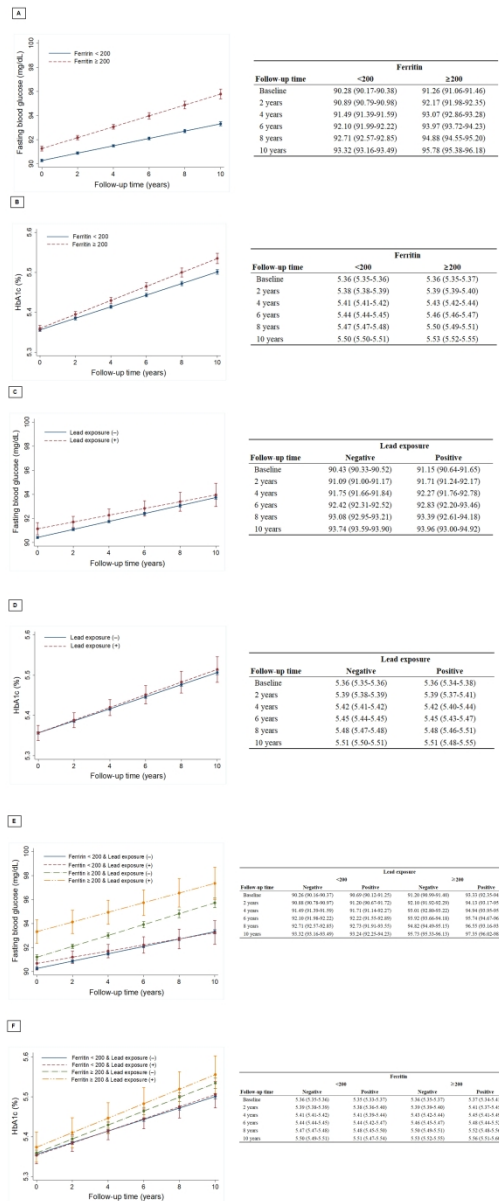

Figure 2. Mixed models were used to evaluate the effects of lead exposure and ferritin on FBS and HbA1c  
 A – Changes in fasting blood glucose according to serum ferritin levels in cohort A  
 B – Changes in HbA1c according to serum ferritin levels in cohort A  
 C – Changes in fasting blood glucose according to lead exposure in cohort A  
 D – Changes in HbA1c according to lead exposure in cohort A  
 E – Changes in fasting blood glucose according to serum ferritin levels and lead exposure in cohort A  
 F – Changes in HbA1c according to serum ferritin levels and lead exposure in cohort A

154x360mm (300 x 300 DPI)

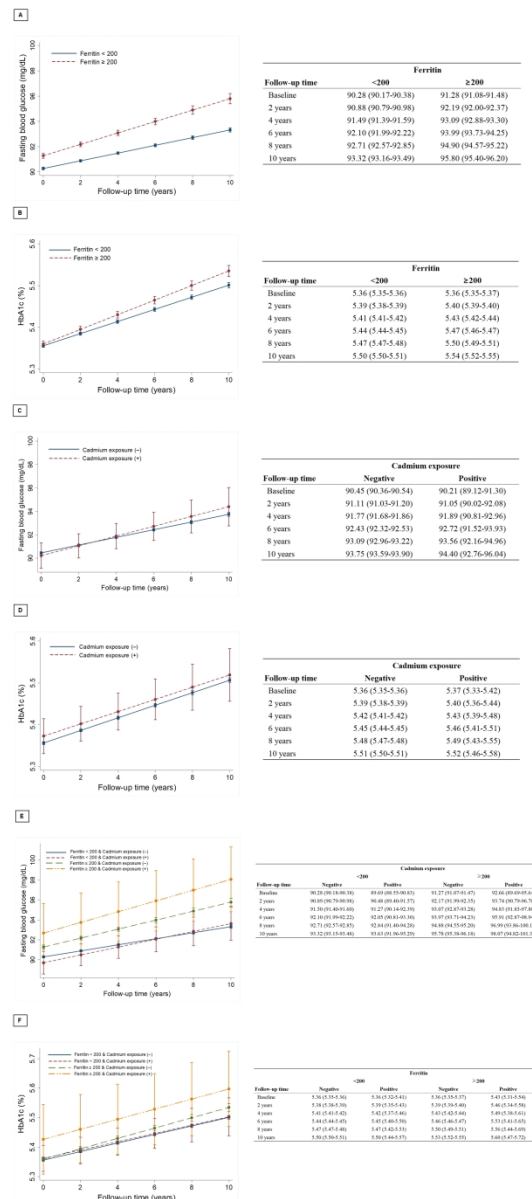

Figure 3. Mixed models were used to evaluate the effects of cadmium exposure and ferritin on FBS and HbA1c

A – Changes in fasting blood glucose according to serum ferritin levels in cohort B

B – Changes in HbA1c according to serum ferritin levels in cohort B

C– Changes in fasting blood glucose according to lead exposure in cohort B

D – Changes in HbA1c according to lead exposure in cohort B

E – Changes in fasting blood glucose according to serum ferritin levels and lead exposure in cohort B

F – Changes in HbA1c according to serum ferritin levels and lead exposure in cohort B

155x347mm (300 x 300 DPI)

1  
2  
3  
4  
5  
6  
7  
8  
9  
10  
11  
12  
13  
14  
15  
16  
17  
18  
19  
20  
21  
22  
23  
24  
25  
26  
27  
28  
29  
30  
31  
32  
33  
34  
35  
36  
37  
38  
39  
40  
41  
42  
43  
44  
45  
46  
47  
48  
49  
50  
51  
52  
53  
54  
55  
56  
57  
58  
59  
60

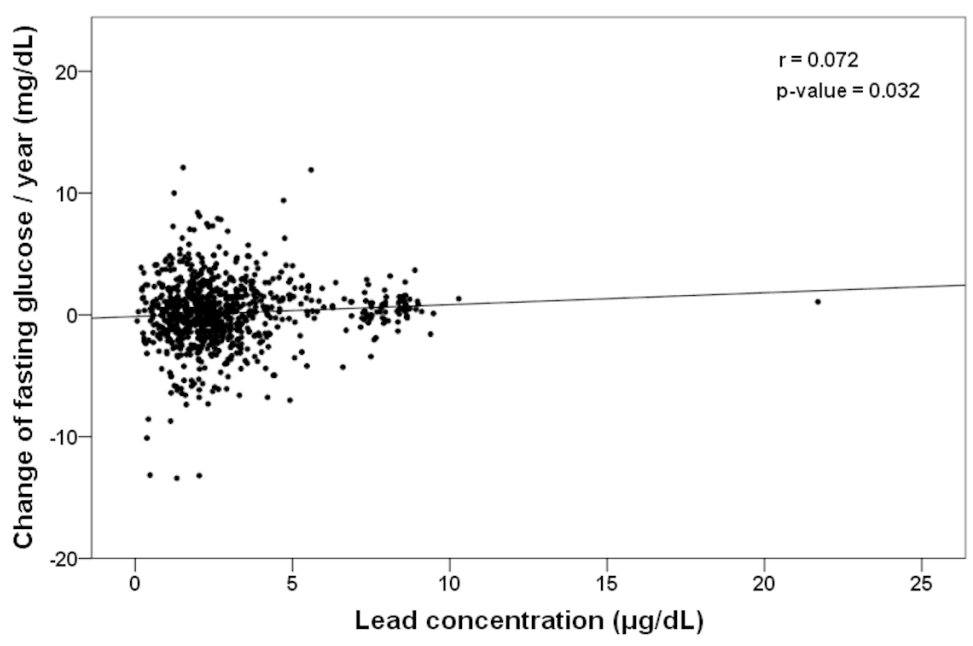

Figure 4. Scatter plot showing the annual changes of fasting blood glucose by lead concentration (r=0.072, p = 0.032)

99x67mm (300 x 300 DPI)

# Reporting checklist for cohort study.

Based on the STROBE cohort guidelines.

## Instructions to authors

Complete this checklist by entering the page numbers from your manuscript where readers will find each of the items listed below.

Your article may not currently address all the items on the checklist. Please modify your text to include the missing information. If you are certain that an item does not apply, please write "n/a" and provide a short explanation.

Upload your completed checklist as an extra file when you submit to a journal.

In your methods section, say that you used the STROBE cohort reporting guidelines, and cite them as:

von Elm E, Altman DG, Egger M, Pocock SJ, Gøtzsche PC, Vandenbroucke JP. The Strengthening the Reporting of Observational Studies in Epidemiology (STROBE) Statement: guidelines for reporting observational studies.

|                           |                                                                                                        | Page   |
|---------------------------|--------------------------------------------------------------------------------------------------------|--------|
|                           | Reporting Item                                                                                         | Number |
| <b>Title and abstract</b> |                                                                                                        |        |
| Title                     | <a href="#">#1a</a> Indicate the study's design with a commonly used term in the title or the abstract | 1      |

|    |                      |                     |                                                                 |   |
|----|----------------------|---------------------|-----------------------------------------------------------------|---|
| 1  | 1Abstract            | <a href="#">#1b</a> | Provide in the abstract an informative and balanced             | 2 |
| 2  |                      |                     |                                                                 |   |
| 3  |                      |                     |                                                                 |   |
| 4  |                      |                     | summary of what was done and what was found                     |   |
| 5  |                      |                     |                                                                 |   |
| 6  | <b>Introduction</b>  |                     |                                                                 |   |
| 7  |                      |                     |                                                                 |   |
| 8  |                      |                     |                                                                 |   |
| 9  |                      |                     |                                                                 |   |
| 10 | Background /         | <a href="#">#2</a>  | Explain the scientific background and rationale for the         | 4 |
| 11 |                      |                     |                                                                 |   |
| 12 | rationale            |                     | investigation being reported                                    |   |
| 13 |                      |                     |                                                                 |   |
| 14 |                      |                     |                                                                 |   |
| 15 | Objectives           | <a href="#">#3</a>  | State specific objectives, including any prespecified           | 5 |
| 16 |                      |                     |                                                                 |   |
| 17 |                      |                     | hypotheses                                                      |   |
| 18 |                      |                     |                                                                 |   |
| 19 |                      |                     |                                                                 |   |
| 20 | <b>Methods</b>       |                     |                                                                 |   |
| 21 |                      |                     |                                                                 |   |
| 22 |                      |                     |                                                                 |   |
| 23 | Study design         | <a href="#">#4</a>  | Present key elements of study design early in the paper         | 6 |
| 24 |                      |                     |                                                                 |   |
| 25 |                      |                     |                                                                 |   |
| 26 | Setting              | <a href="#">#5</a>  | Describe the setting, locations, and relevant dates, including  | 6 |
| 27 |                      |                     |                                                                 |   |
| 28 |                      |                     | periods of recruitment, exposure, follow-up, and data           |   |
| 29 |                      |                     | collection                                                      |   |
| 30 |                      |                     |                                                                 |   |
| 31 |                      |                     |                                                                 |   |
| 32 |                      |                     |                                                                 |   |
| 33 |                      |                     |                                                                 |   |
| 34 | Eligibility criteria | <a href="#">#6a</a> | Give the eligibility criteria, and the sources and methods of   | 6 |
| 35 |                      |                     |                                                                 |   |
| 36 |                      |                     | selection of participants. Describe methods of follow-up.       |   |
| 37 |                      |                     |                                                                 |   |
| 38 |                      |                     |                                                                 |   |
| 39 | Eligibility criteria | <a href="#">#6b</a> | For matched studies, give matching criteria and number of       | 6 |
| 40 |                      |                     |                                                                 |   |
| 41 |                      |                     | exposed and unexposed                                           |   |
| 42 |                      |                     |                                                                 |   |
| 43 |                      |                     |                                                                 |   |
| 44 |                      |                     |                                                                 |   |
| 45 | Variables            | <a href="#">#7</a>  | Clearly define all outcomes, exposures, predictors, potential   | 6 |
| 46 |                      |                     |                                                                 |   |
| 47 |                      |                     | confounders, and effect modifiers. Give diagnostic criteria, if |   |
| 48 |                      |                     | applicable                                                      |   |
| 49 |                      |                     |                                                                 |   |
| 50 |                      |                     |                                                                 |   |
| 51 |                      |                     |                                                                 |   |
| 52 |                      |                     |                                                                 |   |
| 53 | 8Data sources /      | <a href="#">#8</a>  | For each variable of interest give sources of data and details  | 6 |
| 54 |                      |                     |                                                                 |   |
| 55 | measurement          |                     | of methods of assessment (measurement). Describe                |   |
| 56 |                      |                     |                                                                 |   |
| 57 |                      |                     | comparability of assessment methods if there is more than       |   |
| 58 |                      |                     |                                                                 |   |
| 59 |                      |                     |                                                                 |   |
| 60 |                      |                     |                                                                 |   |

one group. Give information separately for for exposed and unexposed groups if applicable.

|    |                |                      |                                                               |
|----|----------------|----------------------|---------------------------------------------------------------|
| 1  |                |                      |                                                               |
| 2  |                |                      |                                                               |
| 3  |                |                      |                                                               |
| 4  |                |                      |                                                               |
| 5  |                |                      |                                                               |
| 6  | Bias           | <a href="#">#9</a>   | Describe any efforts to address potential sources of bias 6   |
| 7  |                |                      |                                                               |
| 8  |                |                      |                                                               |
| 9  | Study size     | <a href="#">#10</a>  | Explain how the study size was arrived at 6                   |
| 10 |                |                      |                                                               |
| 11 |                |                      |                                                               |
| 12 | Quantitative   | <a href="#">#11</a>  | Explain how quantitative variables were handled in the 6      |
| 13 |                |                      |                                                               |
| 14 | variables      |                      | analyses. If applicable, describe which groupings were        |
| 15 |                |                      |                                                               |
| 16 |                |                      |                                                               |
| 17 |                |                      | chosen, and why                                               |
| 18 |                |                      |                                                               |
| 19 | Statistical    | <a href="#">#12a</a> | Describe all statistical methods, including those used to 7   |
| 20 |                |                      |                                                               |
| 21 | methods        |                      | control for confounding                                       |
| 22 |                |                      |                                                               |
| 23 |                |                      |                                                               |
| 24 |                |                      |                                                               |
| 25 | Statistical    | <a href="#">#12b</a> | Describe any methods used to examine subgroups and 7          |
| 26 |                |                      |                                                               |
| 27 | methods        |                      | interactions                                                  |
| 28 |                |                      |                                                               |
| 29 |                |                      |                                                               |
| 30 | Statistical    | <a href="#">#12c</a> | Explain how missing data were addressed8 NA                   |
| 31 |                |                      |                                                               |
| 32 | methods        |                      |                                                               |
| 33 |                |                      |                                                               |
| 34 |                |                      |                                                               |
| 35 |                |                      |                                                               |
| 36 | Statistical    | <a href="#">#12d</a> | If applicable, explain how loss to follow-up was addressed NA |
| 37 |                |                      |                                                               |
| 38 | methods        |                      |                                                               |
| 39 |                |                      |                                                               |
| 40 |                |                      |                                                               |
| 41 | Statistical    | <a href="#">#12e</a> | Describe any sensitivity analyses 7                           |
| 42 |                |                      |                                                               |
| 43 | methods        |                      |                                                               |
| 44 |                |                      |                                                               |
| 45 |                |                      |                                                               |
| 46 | <b>Results</b> |                      |                                                               |
| 47 |                |                      |                                                               |
| 48 |                |                      |                                                               |
| 49 | Participants   | <a href="#">#13a</a> | Report numbers of individuals at each stage of study—eg 9     |
| 50 |                |                      |                                                               |
| 51 |                |                      | numbers potentially eligible, examined for eligibility,       |
| 52 |                |                      |                                                               |
| 53 |                |                      | confirmed eligible, included in the study, completing follow- |
| 54 |                |                      |                                                               |
| 55 |                |                      |                                                               |
| 56 |                |                      |                                                               |
| 57 |                |                      |                                                               |
| 58 |                |                      |                                                               |
| 59 |                |                      |                                                               |
| 60 |                |                      |                                                               |

up, and analysed. Give information separately for for  
exposed and unexposed groups if applicable.

|    |                  |                      |                                                                     |
|----|------------------|----------------------|---------------------------------------------------------------------|
| 1  |                  |                      |                                                                     |
| 2  |                  |                      |                                                                     |
| 3  |                  |                      |                                                                     |
| 4  |                  |                      |                                                                     |
| 5  |                  |                      |                                                                     |
| 6  | Participants     | <a href="#">#13b</a> | Give reasons for non-participation at each stage 9                  |
| 7  |                  |                      |                                                                     |
| 8  |                  |                      |                                                                     |
| 9  | Participants     | <a href="#">#13c</a> | Consider use of a flow diagram 6,9                                  |
| 10 |                  |                      |                                                                     |
| 11 |                  |                      | (fig.1)                                                             |
| 12 |                  |                      |                                                                     |
| 13 |                  |                      |                                                                     |
| 14 | Descriptive data | <a href="#">#14a</a> | Give characteristics of study participants (eg demographic, 9       |
| 15 |                  |                      |                                                                     |
| 16 |                  |                      | clinical, social) and information on exposures and potential        |
| 17 |                  |                      |                                                                     |
| 18 |                  |                      | confounders. Give information separately for exposed and            |
| 19 |                  |                      |                                                                     |
| 20 |                  |                      | unexposed groups if applicable.                                     |
| 21 |                  |                      |                                                                     |
| 22 |                  |                      |                                                                     |
| 23 |                  |                      |                                                                     |
| 24 | Descriptive data | <a href="#">#14b</a> | Indicate number of participants with missing data for each 9        |
| 25 |                  |                      |                                                                     |
| 26 |                  |                      | variable of interest                                                |
| 27 |                  |                      |                                                                     |
| 28 |                  |                      |                                                                     |
| 29 | Descriptive data | <a href="#">#14c</a> | Summarise follow-up time (eg, average and total amount) 9           |
| 30 |                  |                      |                                                                     |
| 31 |                  |                      |                                                                     |
| 32 | Outcome data     | <a href="#">#15</a>  | Report numbers of outcome events or summary measures 9              |
| 33 |                  |                      |                                                                     |
| 34 |                  |                      | over time. Give information separately for exposed and              |
| 35 |                  |                      |                                                                     |
| 36 |                  |                      | unexposed groups if applicable.                                     |
| 37 |                  |                      |                                                                     |
| 38 |                  |                      |                                                                     |
| 39 |                  |                      |                                                                     |
| 40 | Main results     | <a href="#">#16a</a> | Give unadjusted estimates and, if applicable, confounder- 9         |
| 41 |                  |                      |                                                                     |
| 42 |                  |                      | adjusted estimates and their precision (eg, 95% confidence          |
| 43 |                  |                      |                                                                     |
| 44 |                  |                      | interval). Make clear which confounders were adjusted for           |
| 45 |                  |                      |                                                                     |
| 46 |                  |                      | and why they were included                                          |
| 47 |                  |                      |                                                                     |
| 48 |                  |                      |                                                                     |
| 49 |                  |                      |                                                                     |
| 50 | Main results     | <a href="#">#16b</a> | Report category boundaries when continuous variables were 9         |
| 51 |                  |                      |                                                                     |
| 52 |                  |                      | categorized                                                         |
| 53 |                  |                      |                                                                     |
| 54 |                  |                      |                                                                     |
| 55 | Main results     | <a href="#">#16c</a> | If relevant, consider translating estimates of relative risk into 9 |
| 56 |                  |                      |                                                                     |
| 57 |                  |                      | absolute risk for a meaningful time period                          |
| 58 |                  |                      |                                                                     |
| 59 |                  |                      |                                                                     |
| 60 |                  |                      |                                                                     |

|    |                          |                     |                                                                |       |
|----|--------------------------|---------------------|----------------------------------------------------------------|-------|
| 1  | Other analyses           | <a href="#">#17</a> | Report other analyses done—e.g., analyses of subgroups         | 9-10  |
| 2  |                          |                     | and interactions, and sensitivity analyses                     |       |
| 3  |                          |                     |                                                                |       |
| 4  |                          |                     |                                                                |       |
| 5  |                          |                     |                                                                |       |
| 6  | <b>Discussion</b>        |                     |                                                                |       |
| 7  |                          |                     |                                                                |       |
| 8  |                          |                     |                                                                |       |
| 9  |                          |                     |                                                                |       |
| 10 | Key results              | <a href="#">#18</a> | Summarise key results with reference to study objectives       | 11    |
| 11 |                          |                     |                                                                |       |
| 12 |                          |                     |                                                                |       |
| 13 | Limitations              | <a href="#">#19</a> | Discuss limitations of the study, taking into account sources  | 13    |
| 14 |                          |                     | of potential bias or imprecision. Discuss both direction and   |       |
| 15 |                          |                     | magnitude of any potential bias.                               |       |
| 16 |                          |                     |                                                                |       |
| 17 |                          |                     |                                                                |       |
| 18 |                          |                     |                                                                |       |
| 19 |                          |                     |                                                                |       |
| 20 | Interpretation           | <a href="#">#20</a> | Give a cautious overall interpretation considering objectives, | 13    |
| 21 |                          |                     | limitations, multiplicity of analyses, results from similar    |       |
| 22 |                          |                     | studies, and other relevant evidence.                          |       |
| 23 |                          |                     |                                                                |       |
| 24 |                          |                     |                                                                |       |
| 25 |                          |                     |                                                                |       |
| 26 |                          |                     |                                                                |       |
| 27 |                          |                     |                                                                |       |
| 28 | Generalisability         | <a href="#">#21</a> | Discuss the generalisability (external validity) of the study  | 10-13 |
| 29 |                          |                     | results                                                        |       |
| 30 |                          |                     |                                                                |       |
| 31 |                          |                     |                                                                |       |
| 32 |                          |                     |                                                                |       |
| 33 | <b>Other Information</b> |                     |                                                                |       |
| 34 |                          |                     |                                                                |       |
| 35 |                          |                     |                                                                |       |
| 36 | Funding                  | <a href="#">#22</a> | Give the source of funding and the role of the funders for the | 16    |
| 37 |                          |                     | present study and, if applicable, for the original study on    |       |
| 38 |                          |                     | which the present article is based                             |       |
| 39 |                          |                     |                                                                |       |
| 40 |                          |                     |                                                                |       |
| 41 |                          |                     |                                                                |       |
| 42 |                          |                     |                                                                |       |
| 43 |                          |                     |                                                                |       |

None The STROBE checklist is distributed under the terms of the Creative Commons Attribution License CC-BY. This checklist can be completed online using <https://www.goodreports.org/>, a tool made by the [EQUATOR Network](#) in collaboration with [Penelope.ai](#)



# BMJ Open

## The relationship between heavy metal exposure and type 2 diabetes: A large-scale retrospective cohort study using occupational health examinations

|                                 |                                                                                                                                                                                                                                                                                                                                                                                                                                                                            |
|---------------------------------|----------------------------------------------------------------------------------------------------------------------------------------------------------------------------------------------------------------------------------------------------------------------------------------------------------------------------------------------------------------------------------------------------------------------------------------------------------------------------|
| Journal:                        | <i>BMJ Open</i>                                                                                                                                                                                                                                                                                                                                                                                                                                                            |
| Manuscript ID                   | bmjopen-2020-039541.R2                                                                                                                                                                                                                                                                                                                                                                                                                                                     |
| Article Type:                   | Original research                                                                                                                                                                                                                                                                                                                                                                                                                                                          |
| Date Submitted by the Author:   | 24-Nov-2020                                                                                                                                                                                                                                                                                                                                                                                                                                                                |
| Complete List of Authors:       | Ji, Jun Ho ; Samsung Changwon Hospital, Internal medicine<br>Jin, Mi Hyeon ; Samsung Changwon Hospital<br>Kang, Jung-Hun ; Gyeongsang National University College of Medicine, Internal Medicine<br>Lee, Soon Il ; Dankook University College of Medicine, Internal Medicine<br>Lee, Suee ; Dong-A University Medical Center, Internal medicine<br>Kim, Sung-Hyun ; Dong-A University Medical Center, Internal Medicine<br>Oh, Sung Yong; Dong-A University Medical Center |
| <b>Primary Subject Heading</b>: | Occupational and environmental medicine                                                                                                                                                                                                                                                                                                                                                                                                                                    |
| Secondary Subject Heading:      | Diabetes and endocrinology                                                                                                                                                                                                                                                                                                                                                                                                                                                 |
| Keywords:                       | Diabetes & endocrinology < INTERNAL MEDICINE, SOCIAL MEDICINE, EPIDEMIOLOGY                                                                                                                                                                                                                                                                                                                                                                                                |
|                                 |                                                                                                                                                                                                                                                                                                                                                                                                                                                                            |

SCHOLARONE™  
Manuscripts



I, the Submitting Author has the right to grant and does grant on behalf of all authors of the Work (as defined in the below author licence), an exclusive licence and/or a non-exclusive licence for contributions from authors who are: i) UK Crown employees; ii) where BMJ has agreed a CC-BY licence shall apply, and/or iii) in accordance with the terms applicable for US Federal Government officers or employees acting as part of their official duties; on a worldwide, perpetual, irrevocable, royalty-free basis to BMJ Publishing Group Ltd ("BMJ") its licensees and where the relevant Journal is co-owned by BMJ to the co-owners of the Journal, to publish the Work in this journal and any other BMJ products and to exploit all rights, as set out in our [licence](#).

The Submitting Author accepts and understands that any supply made under these terms is made by BMJ to the Submitting Author unless you are acting as an employee on behalf of your employer or a postgraduate student of an affiliated institution which is paying any applicable article publishing charge ("APC") for Open Access articles. Where the Submitting Author wishes to make the Work available on an Open Access basis (and intends to pay the relevant APC), the terms of reuse of such Open Access shall be governed by a Creative Commons licence – details of these licences and which [Creative Commons](#) licence will apply to this Work are set out in our licence referred to above.

Other than as permitted in any relevant BMJ Author's Self Archiving Policies, I confirm this Work has not been accepted for publication elsewhere, is not being considered for publication elsewhere and does not duplicate material already published. I confirm all authors consent to publication of this Work and authorise the granting of this licence.

1  
2  
3  
4 1 **The relationship between heavy metal exposure and type 2 diabetes: A**  
5  
6  
7 2 **large-scale retrospective cohort study using occupational health**  
8  
9 3 **examinations**

11 4 Jun Ho Ji<sup>1</sup>, Mi Hyeon Jin<sup>2</sup>, Jung-Hun Kang<sup>3</sup>, Soon Il Lee<sup>4</sup>,

14 5 Suee Lee<sup>5</sup>, Sung-Hyun Kim<sup>5</sup>, Sung Yong Oh<sup>5#</sup>

17  
18  
19  
20  
21 8 <sup>1</sup>Department of Internal Medicine, Samsung Changwon Hospital, Sungkyunkwan University School of  
22 9 Medicine, Changwon, Korea;

23  
24  
25 10 <sup>2</sup>Department of Biostatistics, Samsung Changwon Hospital, Sungkyunkwan University School of  
26 11 Medicine, Changwon, Korea;

27  
28  
29 12 <sup>3</sup>Department of Internal Medicine, Gyeongsang National University Scholl of Medicine, Jinju, Korea;

30  
31  
32 13 <sup>4</sup>Department of Internal Medicine, Dankook University College of Medicine, Cheonan;

33  
34  
35 14 <sup>5</sup>Department of Internal Medicine, Dong-A University College of Medicine, Busan

36  
37 15  
38  
39 16 **Running title:** Relationship between heavy metal exposure and diabetes

40  
41 17 **Word count:** 3489

42  
43  
44 18 **Corresponding author:** Sung Yong Oh

45  
46  
47 19 Address: Department of Internal Medicine, Dong-A University College of Medicine, 26 Daesingongwon-  
48 20 Ro, Seo-Gu, Busan 49201, Korea

49  
50  
51 21 Mobile: +82-10-8624-9818

52  
53  
54 22 E-mail: drosy@dau.ac.kr

## 1 Abstract

2 **Objectives:** To investigate the associations between heavy metal exposure and serum ferritin levels,  
3 physical measurements, and type 2 diabetes mellitus (DM).

4 **Design:** A retrospective cohort study.

5 **Setting:** Changwon, the location of this study, is a Korean representative industrial city. Data were  
6 obtained from medical check-ups between 2002 and 2018.

7 **Participants:** A total of 34,814 male subjects were included. Of them, 1,035 subjects with lead  
8 exposure, 200 subjects with cadmium exposure, and the 33,579 remaining were assigned to cohort A,  
9 cohort B, and the control cohort, respectively. Data including personal history of alcohol and smoking,  
10 age, height, weight, the follow-up duration, HbA1c, fasting blood sugar (FBS), ferritin levels, and lead  
11 and cadmium levels within one year after exposure were collected.

12 **Primary outcome measure:** In subjects without diabetes, changes in FBS and HbA1c were analyzed  
13 through repeated tests at intervals of one year or longer after the occupational exposure to heavy metals.

14 **Results:** In cohort A, DM was diagnosed in 33 subjects. There was a significant difference in lead  
15 concentrations between the subjects diagnosed with DM and those without DM during the follow-up  
16 period ( $3.94 \pm 2.92$  mg/dL versus  $2.81 \pm 2.03$  mg/dL,  $p = 0.002$ ). Simple exposure to heavy metals (lead  
17 and cadmium) was not associated with DM in Cox regression models (lead exposure hazard ratio [HR]  
18 1.01, 95% CI 0.58 – 1.77,  $p = 0.971$ ; cadmium exposure HR 1.48, 95% CI: 0.61 – 3.55,  $p = 0.385$ ). Annual  
19 changes in FBS according to lead concentration at the beginning of exposure showed a positive  
20 correlation ( $r = 0.072$ ,  $p = 0.032$ ).

21 **Conclusion:** Our findings demonstrated that simple occupational exposure to heavy metals lead and  
22 cadmium was not associated with the incidence of DM. However, lead concentrations at the beginning  
23 of the exposure might be an indicator of DM and glucose elevations.

24  
25 **Keywords:** diabetes, heavy metal exposure, HbA1c, body mass index, ferritin

## Strengths and limitations of this study

- This study was limited by the single institute data obtained from occupational medical evaluations.
- Another important limitation of the study was the exclusion of females of childbearing age who have decreased serum ferritin due to menstruation.
- This study was a large-scale study to determine the blood concentrations of heavy metals (initial exposure to occupational heavy metal and exposure over a long period of time) and changes in FBS and HbA1c levels.
- This study showed changes in blood glucose and HbA1c over time after exposure to heavy metals.

## 1 - Introduction

Diabetes mellitus (DM), a common and rising global problem, is one of the leading causes of death, blindness, and chronic renal failure. It is also a major risk factor for vascular diseases such as myocardial infarction, stroke, and peripheral vascular disease. The increase in social cost due to DM-related morbidity or mortality has intensified efforts to reduce the incidence of DM. The rising incidence of DM is considered to be associated with alterations in lifestyles and other contributing factors, including exposure to several environmental pollutants and industrial chemicals.

With rapid industrial development, exposure to various environmental toxic materials has risen along with DM incidence. Environmental substances that cause endocrine disruption have been defined as endocrine-disrupting chemicals (EDC) by the U.S. Environmental Protection Agency (EPA) [1]. Metals are naturally existing inorganic elements that are present in very small amounts in the body. They are essential for vital processes. Heavy metals are generally defined as metals with relatively high densities, atomic weights, or atomic numbers. Heavy metals and metalloids (e.g., lead, mercury, cadmium, and metalloid arsenic) can affect hormonal activity, suggesting that these compounds are EDCs generally considered to be toxicants. These heavy metals have negative effects on physiology. They might be associated with the incidence of DM in some populations. In this study, we particularly focused on the association between exposure to heavy metals and DM. In recent decades, environmental exposure to heavy metals has declined because many countries have begun to pay attention to environmental problems rather than industrial development. However, the unintended exposure to heavy metals in the environment such as older household structures and in drinking water in Flint, MI, USA [2], is still possible. Such exposure can be due to the illegal, unauthorized disposal of toxic materials including heavy metals from industries. In Korea, occupational exposure to heavy metals is more common than random environmental exposure.

In occupational exposure to heavy metals, relatively few studies have reported whether the degree of exposure has direct or indirect effects on the body or specific diseases. A few population-based studies have focused on the association between metal exposure and diabetes, showing inconsistent results [3-9]. Most previous studies have examined the association of DM with heavy metal

1 concentrations in the blood or urine at one specific time [6, 7].

2 Intense exposure to heavy metals can result in high levels of heavy metals in the blood or urine,  
3 whereas light exposure results in extremely low levels. Although long-term, light exposure to heavy  
4 metals might only lead to low levels of heavy metals in the blood or urine, heavy metals deposited in  
5 organs may be harmful. The deposition of heavy metals in the liver and pancreas can alter  
6 gluconeogenesis in the liver and affect insulin secretion, eventually influencing the incidence of DM.  
7 Although this study was designed as a retrospective study of long-term occupational exposure to heavy  
8 metals (lead and cadmium), instead of measuring the concentration of heavy metals in organs such as  
9 the liver, bone, and pancreas, the blood concentrations of heavy metals at the beginning of the exposure  
10 (within one year) were measured and compared to changes in FBS, HbA1c, and the incidence of DM  
11 in the general population who were not exposed to heavy metals during the same period.

## 1 **Material and Methods**

### 2 1) Study population

3 Changwon, the location of this study, is a representative industrial city in Korea. Many occupations  
4 involve heavy metal exposure, including employees of battery-manufacturing plants. This cohort study  
5 was based on the data from occupational health examinations ( $n = 403,253$ ) conducted from 2002 to  
6 2018 in subjects with jobs related to heavy metals. A schematic flow chart for the selection of subjects  
7 is shown in Figure 1. All participants underwent a physical examination with a blood sample taken in  
8 the morning following an overnight fast. They also filled out a questionnaire. Among these 403,253  
9 subjects, 89,826 who had ferritin blood levels measured were included and 38,039 women were  
10 excluded. In occupational screening, most women were fertile. The ferritin results might be low because  
11 of menstruation. A total of 269 subjects were excluded because of the unavailability of HbA1c or FBS  
12 data. Furthermore, 2709 subjects who were already diagnosed with DM were excluded (DM was  
13 defined as  $FBS \geq 126$  mg/dl,  $HbA1c \geq 6.5\%$ , or a history of DM reported in the questionnaire).  
14 Additionally, 28,151 subjects were excluded because they only had only one screening result without  
15 follow-up data. Finally, 34,814 subjects were included in the analysis. Of these, 1,035 subjects with lead  
16 exposure, 200 subjects with cadmium exposure, and the 33,579 remaining subjects were assigned to  
17 cohort A, cohort B, and the control cohort, respectively. This study collected subject data including age,  
18 HbA1c, FBS, ferritin levels, height, body weight, the follow-up duration, and the concentrations of heavy  
19 metals (lead and cadmium). The study protocol was approved by the Institutional Review Board (IRB)  
20 of Samsung Changwon Medical Center (SCMC-2019-04-014). All participants provided written  
21 informed consent for the use of their data.

### 22 2) Data collection

23 This study was based on data from occupational health examinations already conducted. The health  
24 check-up data included objective numerical data such as blood tests, imaging tests, and physical  
25 examinations, as well as the questionnaire responses of the subjects. The questionnaire included items  
26 on personal history, physical activity, systemic symptoms, sleep patterns, stress, anxiety, depression,



1 gambling, and job stress. All data were computerized. The authors analysed the demographic  
2 information, physical examination results, past history, and laboratory results (HbA1c, blood glucose,  
3 ferritin, lead, and cadmium levels). After obtaining IRB approval, two authors (JHJ and MHJ)  
4 independently analysed the data.

### 5 3) Measuring blood levels of lead and cadmium

6 To measure the blood levels of lead and cadmium, 3 ml of blood was collected from each subject into  
7 vacuum bottles using heparin as an anticoagulant in the morning following an overnight fast. Blood  
8 samples were diluted 1:15 and 1:10 to measure the lead and cadmium concentrations, respectively,  
9 with 2.5 ml of 10% Triton X-100, 0.1 ml of concentrated nitric acid, and 1 ml of 10% ammonium di-  
10 hydrogen phosphate as a modifier. Graphite-furnace atomic absorption spectrometry with Zeeman  
11 background correction (PinAAcle 9i00z Atomic absorption spectrometer, PerkinElmer, Norwalk,  
12 Connecticut, USA) was used to measure the lead and cadmium levels in all subjects within the first year  
13 of heavy metal exposure. The minimum detectable limits of lead and cadmium were measured to the  
14 third decimal place (0.001mg/dl), and concentrations below that were considered to be zero.

### 15 4) Statistical analyses

16 The continuous variables are presented as means  $\pm$  standard deviation. The categorical variables are  
17 presented as the number of cases and percentages. An independent t-test was used to evaluate the  
18 significance of the mean differences between the continuous variables for demographical factors such  
19 as age and body mass index (BMI). The Cox proportional hazard model was used to identify potential  
20 predictors in the baseline characteristics for type 2 DM in subjects who were not diagnosed with DM. In  
21 the Cox hazard model, the independent variables were set to the exposure levels of lead and cadmium  
22 and the known risk factors (age, BMI, smoking, drinking, HbA1c, FBS, and ferritin) of diabetes were set  
23 as dependent variables. A mixed model was used to assess the effects of heavy metal exposure and  
24 ferritin on FBS and HbA1c, respectively. The annual changes in FBS and HbA1c with lead  
25 concentrations are shown in a scatter plot. Stata 14.0 software (Stata Corporation, College Station, TX,  
26 USA) was used for all statistical analyses.

1  
2  
3  
4 1 5) Operational definitions  
5

6  
7 2 1. Type 2 DM was defined in patients with a diabetes diagnosis history taking anti-diabetic  
8  
9 3 medication or satisfying the American Diabetes Association (ADA) criteria of HbA1c  $\geq$  6.5%  
10  
11 4 or FBS  $\geq$  126 mg/dl in a blood test after an 8-hour fast.  
12

13  
14 5 2. Newly diagnosed diabetes was defined in subjects without a history of diabetes who had an  
15  
16 6 HbA1c of  $<$  6.5% and an FBS of  $<$  100 mg/dl in the first health check-up after joining the  
17  
18 7 company and were newly diagnosed with diabetes (HbA1c  $\geq$  6.5% or FBS  $\geq$  126 mg/dl) in  
19  
20 8 a follow-up health check-up conducted at least one year later.  
21

22  
23 9 3. The heavy metal exposure subjects were those who worked in the lead industry, those who  
24  
25 10 were in charge of lead welding and mounting in shipyards, and subjects who worked in Ni-Cd  
26  
27 11 battery manufacturing factories.  
28

29  
30 12 4. Simple occupational exposure to lead or cadmium, called simple exposure, referred to subjects  
31  
32 13 who worked on-site at the workplace regardless of the intensity of the exposure.  
33

34 14 5. The beginning of exposure referred to the first occupational health examination conducted  
35  
36 15 within a year of working in the workplace related to heavy metal exposure.  
37

38  
39 16 6) Patient and public involvement  
40

41 17 The patients and the public were not involved in the development of the research question or the design  
42  
43 18 of the study. No patients or public members were involved in the recruitment or conduct of the study.  
44  
45 19 Since this study used de-identified results, the authors do not plan to disseminate the study results to  
46  
47 20 the study participants individually but plan to publish the paper with open access.  
48

49  
50 21

51  
52 22

53  
54 23

55  
56 24  
57

## Results

### 1) Baseline characteristics of the study subjects

The baseline characteristics of the subjects in each cohort are shown in Table 1. Of 34,818 subjects, 1,034 were diagnosed with DM during the follow-up and 33,780 were not diagnosed with DM. In cohort A (1,035 subjects with lead-exposure and 33,779 subjects with no lead exposure), 1,034 were confirmed to have DM. Of these 1,034 subjects, 33 were exposed to lead. In the control group without heavy metal exposure, age, HbA1c, FBS, and ferritin levels were associated with DM, as expected. In heavy metal-exposed subjects, only HbA1c, FBS, and BMI were significantly associated with DM. An interesting aspect in cohort A was that the initial concentration of lead (within one year) was significantly higher in subjects who were later diagnosed with DM ( $2.81 \pm 2.03$  mg/dL in patients not diagnosed with diabetes and  $3.94 \pm 2.92$  mg/dL in patients diagnosed with diabetes,  $p = 0.002$ ). In contrast, the early cadmium blood levels did not differ between the group of subjects progressing to DM and those who did not progress to DM. The rates of drinking and smoking in patients with diabetes was similar to that in previous studies. Overall, the incidence of diabetes was higher in drinkers than in non-drinkers and higher in smokers than in ex-smokers or never smokers. However, the total number of subjects exposed to heavy metals was small, resulting in no statistical significance. The follow-up period was shorter and the mean age was higher in subjects progressing to DM in both cohorts. In the lead-exposed group, the mean follow-up duration was  $3.18 \pm 3.63$  years for the group with DM and  $4.78 \pm 2.77$  years ( $p = 0.001$ ) for the non-diabetes group. In the cadmium-exposed group, the mean follow-up duration was  $5.45 \pm 4.76$  years for the DM group and  $6.96 \pm 3.77$  years ( $p = 0.207$ ) for the non-diabetes group.

### 2) Risk of developing DM from lead/cadmium exposure and serum ferritin levels

The Cox-regression models showed the crude and adjusted hazard ratios of the variables predicting the development of DM (Table 2). Age, HbA1c, FBS, BMI, current smoking, and ferritin were predictors for developing DM in both the crude and adjusted models. However, simple exposure to lead or cadmium was not associated with DM. Ferritin levels had a positive relationship with FBS and HbA1c elevations during the follow-up period in both cohorts A and B (Figures 2-A, 2-B, 3-A, 3-B). FBS elevations in subjects with simple lead exposure were slower than in those without lead exposure

1  
2  
3  
4 1 (Figure 2-C). However, simple lead exposure did not have a significant effect on HbA1c elevation  
5  
6 2 (Figure 2-D). The association of early cadmium exposure on the FBS/HbA1c change was not different  
7  
8 3 from that of lead. In cohort B, ferritin also had significant effects on the elevation of FBS and HbA1c  
9  
10 4 (Figure 3-A, Figure 3-B). Early exposure to cadmium was positively correlated with the rate of FBS  
11  
12 5 change but negatively correlated with HbA1c change (Figures 3-C, 3-D). The unusual finding in both  
13  
14 6 cohorts was that all subjects were healthy, without DM at the time of enrolment. However, subjects with  
15  
16 7 elevated ferritin and heavy metal exposure had higher baseline FBS and HbA1c values than those who  
17  
18 8 did not (Figures 2-E, 2-F, 3-E, 3-F). Regarding the concentrations of heavy metals, annual variations in  
19  
20 9 FBS according to the initial lead concentrations showed weak but positive correlations ( $r = 0.072$ ,  $p =$   
21  
22 10  $0.032$ , Figure 4).

## 1 Discussion

2 Many studies have attempted to explain the relationship between heavy metal exposure and  
3 hyperglycaemia. Several plausible hypotheses have resulted from such research. First, oxidative stress  
4 caused by heavy metals can directly damage beta cells of the pancreas, leading to elevated serum  
5 glucose levels [10-17]. Such oxidative stress may also increase blood glucose levels by decreasing  
6 insulin release, impairing insulin receptors, disrupting glucose uptake, increasing hepatic  
7 gluconeogenesis and pancreatic glucagon secretion, and decreasing peripheral glucose use [16, 18-  
8 22]. Another hypothesis is related to the competitive inhibition of toxic metals. It states that essential  
9 trace metals at normal levels play a key role in glucose homeostasis because these metals are essential  
10 cofactors for glucose metabolism, pancreatic beta-cell function, and the insulin signalling cascade [18,  
11 19, 23, 24]. Toxic metals compete with these essential metals for various physiological functions and  
12 affect type 2 DM risk [25, 26]. It has also been reported that toxic metals can affect various substances,  
13 including glucose transporter type 4, nuclear factor kappa B, mitogen-activated protein kinases, and  
14 phosphoinositide 3-kinase involved in insulin signalling, thereby increasing the risk of DM [27-31]. The  
15 last hypothesis is that exposure to metals, especially heavy metals, can increase body weight, a theory  
16 based on population studies. Because weight gain is a known risk factor for DM, exposure to heavy  
17 metals might be associated with DM [32-36]. Many studies on the relationship between heavy metal  
18 exposure and DM have been performed based on these findings. However, they showed inconsistent  
19 results [3-9]. Thus, it can be inferred that a direct association between heavy metals and DM has not  
20 yet been confirmed. Even if such association is relevant, it is very weak. The prior epidemiologic studies  
21 reporting inconsistent results connecting heavy metals to DM have limitations. Most previous studies  
22 had cross-sectional designs [3-5, 7-9]. A cross-sectional study is characterized by an analysis  
23 conducted at a specific point in time. It does not reflect changes over time. In the case of heavy metal  
24 exposure, chronic long-time exposure is more common than acute exposure. Therefore, the time of  
25 exposure to heavy metals is important. The time elapsed since the first exposure should be also  
26 considered. A Chinese study reported that insulin secretion was decreased more in the group exposed  
27 to cadmium for more than 10 years than in the group exposed to cadmium for less than 10 years [37].  
28 Previous studies have also been conducted with a case-control design [3, 9, 38, 39]. It is well-known

1  
2  
3  
4 1 that a small case-control study tends to be less expensive and shorter in duration. However, it has a  
5  
6 2 low level of evidence.

7  
8  
9 3 This study investigated the relationships between serum ferritin levels, exposure to heavy metals, and  
10  
11 4 DM during the health screening of subjects who worked in battery, paint, and bullet manufacturing  
12  
13 5 facilities, shipyards, or workplaces requiring welding. Although this study included data from a single  
14  
15 6 institution, it was designed as a retrospective longitudinal study using a large number of health  
16  
17 7 screening subjects, thus overcoming the limitations of prior studies. The following results were obtained.  
18  
19 8 (1) Simple exposure to heavy metals did not increase the risk of developing DM over time. However,  
20  
21 9 the concentration of lead at the time of initial lead exposure was higher in subjects later diagnosed with  
22  
23 10 DM. (2) Serum ferritin was a predictor of DM, as previously reported [40]. However, serum ferritin was  
24  
25 11 not a predictor of DM in subjects exposed to lead or cadmium. (3) A high blood lead concentration at  
26  
27 12 the beginning of the lead exposure was proportional to the rate of increase in FBS per year. It was  
28  
29 13 noteworthy that when the blood lead concentration measured within a year after exposure was high,  
30  
31 14 the rate of FBS increased gradually with time. A high blood lead concentration means that the lead  
32  
33 15 exposure intensity is strong in a short time. Thus, lead exposure intensity might be a risk factor for DM.  
34  
35 16 This aligns with our other study results, in which simple exposure to heavy metals was not related to  
36  
37 17 the incidence of DM or elevations in FBS and HbA1c. The concentrations of heavy metals in our cohort  
38  
39 18 were slightly higher than those in the Korean general adult population in a demographic study on  
40  
41 19 environmental exposure to heavy metals by Kim et al. [41]. This suggests that our cohort was  
42  
43 20 occupationally exposed to heavy metals. However, their exposure intensity was not high enough to  
44  
45 21 significantly affect the incidence of DM. Similar to our results, a Korean study demonstrated that low-  
46  
47 22 dose lifetime environmental exposure to lead and cadmium might not affect the incidence of DM.  
48  
49 23 Another interesting aspect of this study is shown in Table 1. In the lead- and cadmium-exposed groups,  
50  
51 24 serum ferritin levels in the group with diabetes were significantly higher than those in the non-diabetes  
52  
53 25 group, but not in subjects exposed to lead or cadmium (serum ferritin was lower in the diabetes group).  
54  
55 26 The reason for these results cannot be precisely explained. Oxidative stress caused by the production  
56  
57 27 of free radicals [12-16,18], a mechanism by which heavy metals cause DM, might be the mechanism  
58  
59 28 involved in the development of DM [42, 43]. Some large-scale US studies have shown that high blood

1  
2  
3  
4 1 levels of persistent organic pollutants (POPs), which are not heavy metals but bio-accumulate as heavy  
5  
6 2 metals with chronic environmental exposure globally, pose an increased risk for DM [44]. The  
7  
8 3 mechanism by which POPs induce DM is similar to that for DM induced by heavy metals [45, 46]. Similar  
9  
10 4 to studies on the associations of heavy metals and DM, studies on the associations of POPs with DM  
11  
12 5 also showed discrepant results [47-49].  
13

14 6 The current findings should be interpreted with caution because of several limitations. Since this study  
15  
16 7 was based on data from subjects undergoing health check-ups, we could not identify or analyse the risk  
17  
18 8 factors of DM, including hypertension, family history, and dyslipidaemia. The second limitation was that  
19  
20 9 the blood concentrations of heavy metals were measured only once at the beginning of the exposure.  
21  
22 10 Follow-up observations such as the diagnosis of DM were done longitudinally without reflecting changes  
23  
24 11 in the serum concentrations of heavy metals as in a cross-sectional study. The limited study cohort  
25  
26 12 population was another limitation. Because of possible iron deficiency during menstruation, female  
27  
28 13 subjects were excluded. Due to the nature of the industry dealing with heavy metals, it is a limited study  
29  
30 14 cohort to include only young subjects in the study. Although this study excluded female subjects, it  
31  
32 15 would be interesting to investigate the relationship between occupational heavy metal exposure and  
33  
34 16 diabetes in women. Although menstruation can cause iron deficiency, serum ferritin is associated with  
35  
36 17 the risk of developing diabetes in fertile women. Thus, further studies with female subjects are  
37  
38 18 warranted.  
39

40 19 In conclusion, our findings demonstrated that simple exposure to lead or cadmium was not associated  
41  
42 20 with the prevalence of DM. However, blood lead concentrations at the beginning of exposure might be  
43  
44 21 a predictor of DM development and glucose elevations. Our results suggest that low-dose, chronic  
45  
46 22 occupational exposure to lead or cadmium may not affect the incidence of DM. However, if the exposure  
47  
48 23 intensity is high, screening for DM should be performed.  
49

50 24  
51  
52

53 25  
54  
55

56 26  
57  
58  
59  
60

1  
2  
3  
4  
5  
6  
7  
8  
9  
10  
11  
12  
13  
14  
15  
16  
17  
18  
19  
20  
21  
22  
23  
24  
25  
26  
27  
28  
29  
30  
31  
32  
33  
34  
35  
36  
37  
38  
39  
40  
41  
42  
43  
44  
45  
46  
47  
48  
49  
50  
51  
52  
53  
54  
55  
56  
57  
58  
59  
60

1 **A competing interests statement:** Non declared

2

For peer review only



1  
2  
3  
4 1 **Authors' contribution:**  
5

6  
7 2 Conception or design: JHJ  
8

9 3 Acquisition, analysis, or interpretation of data: JHJ  
10

11 4 Drafting the work or revising: JHJ,MHJ,JHK,SIL,SL,SHK,SYO  
12

13 5 Final approval of the manuscript: JHJ,MHJ,JHK,SIL,SL,SHK,SYO  
14

15 6  
16

17 7  
18

19 8  
20

21 9  
22

23 10  
24  
25  
26  
27  
28  
29  
30  
31  
32  
33  
34  
35  
36  
37  
38  
39  
40  
41  
42  
43  
44  
45  
46  
47  
48  
49  
50  
51  
52  
53  
54  
55  
56  
57  
58  
59  
60

For peer review only

1  
2  
3  
4  
5  
6  
7  
8  
9  
10  
11  
12  
13  
14  
15  
16  
17  
18  
19  
20  
21  
22  
23  
24  
25  
26  
27  
28  
29  
30  
31  
32  
33  
34  
35  
36  
37  
38  
39  
40  
41  
42  
43  
44  
45  
46  
47  
48  
49  
50  
51  
52  
53  
54  
55  
56  
57  
58  
59  
60

1 **A funding statement:** This study was supported by Dong-A University Research fund 2020.

2

3 **Acknowledgements:** Thanks to all the patients who participated in this study.

4

5 **Data availability:** [drosy@dau.ac.kr](mailto:drosy@dau.ac.kr) / [junofanclub@hanmail.net](mailto:junofanclub@hanmail.net). We will response to request including  
6 raw data form of excel file.

7

8

9

10

11

12

13

14

15

16

17

For peer review only

1  
2  
3  
4 = **Figure legends** =  
5

6  
7 **Figure 1.** Schematic flow diagram  
8

9 **Figure 2.** Mixed models were used to evaluate the effects of lead exposure and ferritin on FBS and  
10 HbA1c  
11

12  
13  
14 A – Changes in fasting blood glucose according to serum ferritin levels in cohort A  
15

16 B – Changes in HbA1c according to serum ferritin levels in cohort A  
17

18  
19 C – Changes in fasting blood glucose according to lead exposure in cohort A  
20

21 D – Changes in HbA1c according to lead exposure in cohort A  
22

23  
24 E – Changes in fasting blood glucose according to serum ferritin levels and lead exposure in cohort A  
25

26  
27 F – Changes in HbA1c according to serum ferritin levels and lead exposure in cohort A  
28

29 **Figure 3.** Mixed models were used to evaluate the effects of cadmium exposure and ferritin on FBS  
30 and HbA1c  
31

32  
33  
34 A – Changes in fasting blood glucose according to serum ferritin levels in cohort B  
35

36 B – Changes in HbA1c according to serum ferritin levels in cohort B  
37

38  
39 C – Changes in fasting blood glucose according to lead exposure in cohort B  
40

41 D – Changes in HbA1c according to lead exposure in cohort B  
42

43  
44 E – Changes in fasting blood glucose according to serum ferritin levels and lead exposure in cohort B  
45

46  
47 F – Changes in HbA1c according to serum ferritin levels and lead exposure in cohort B  
48

49 **Figure 4.** Scatter plot showing the annual changes of fasting blood glucose by lead concentration  
50  
51 ( $r=0.072$ ,  $p = 0.032$ )  
52  
53  
54  
55  
56  
57

1  
2  
3  
4  
5  
6  
7  
8  
9  
10  
11  
12  
13  
14  
15  
16  
17  
18  
19  
20  
21  
22  
23  
24  
25  
26  
27  
28  
29  
30  
31  
32  
33  
34  
35  
36  
37  
38  
39  
40  
41  
42  
43  
44  
45  
46  
47  
48  
49  
50  
51  
52  
53  
54  
55  
56  
57  
58  
59  
60

= Table legends =

1  
2  
3  
4  
5  
6

**Table1.** Baseline characteristics

**Table2.** Cox regression models: Crude and adjusted HRs of baseline characteristics predicting the development of type 2 diabetes mellitus

For peer review only

Table 1. Baseline characteristics

|                                         | Lead (Cohort A)            |                       |         |                           |                    |         |
|-----------------------------------------|----------------------------|-----------------------|---------|---------------------------|--------------------|---------|
|                                         | No exposure<br>(n=33,779)  |                       |         | Exposure<br>(n=1,035)     |                    |         |
|                                         | Non diabetes<br>(n=32,778) | Diabetes<br>(n=1,001) | P-value | Non diabetes<br>(n=1,002) | Diabetes<br>(n=33) | P-value |
| Age                                     | 34.99 ± 7.99               | 37.96 ± 8.16          | <0.001  | 32.18 ± 8.36              | 34.19 ± 7.92       | 0.174   |
| HbA1c (%)                               | 5.32 ± 0.30                | 5.76 ± 0.59           | <0.001  | 5.33 ± 0.29               | 5.88 ± 0.81        | <0.001  |
| Fasting blood sugar<br>(mg/dL)          | 89.98 ± 8.65               | 103.49 ± 18.90        | <0.001  | 91.37 ± 9.11              | 114.36 ± 32.71     | <0.001  |
| Ferritin (ng/mL)                        | 145.71 ± 93.76             | 165.55 ± 119.90       | <0.001  | 152.51 ± 99.86            | 139.77 ± 89.57     | 0.470   |
| Smoking<br>(n=3,727)                    |                            |                       | <0.001  |                           |                    | 0.511   |
| Never smoker                            | 9,716                      | 212                   |         | 367                       | 8                  |         |
| Ex-smoker                               | 6,210                      | 173                   |         | 183                       | 8                  |         |
| Current smoker                          | 12,958                     | 460                   |         | 416                       | 46                 |         |
| Alcohol (n=34,814)                      |                            |                       | 0.003   |                           |                    | 0.620   |
| No                                      | 3,515                      | 137                   |         | 30                        | 0                  |         |
| Yes                                     | 29,263                     | 864                   |         | 972                       | 33                 |         |
| Body mass index<br>(Kg/m <sup>2</sup> ) | 24.04 ± 3.03               | 25.89 ± 3.54          | <0.001  | 24.04 ± 3.17              | 26.04 ± 2.87       | <0.001  |
| Lead concentration<br>(mg/dL)           | -                          | -                     | -       | 2.81 ± 2.03               | 3.94 ± 2.92        | 0.002   |
| Follow-up duration<br>(year)            | 5.65 ± 3.48                | 5.09 ± 3.67           | <0.001  | 4.78 ± 2.77               | 3.18 ± 3.63        | 0.001   |
|                                         | Cadmium (Cohort B)         |                       |         |                           |                    |         |
|                                         | No exposure<br>(n=34,614)  |                       |         | Exposure<br>(n=200)       |                    |         |
|                                         | Non diabetes<br>(n=33,591) | Diabetes<br>(n=1,023) | P-value | Non diabetes<br>(n=189)   | Diabetes<br>(n=11) | P-value |
| Age                                     | 34.91 ± 8.02               | 37.84 ± 8.19          | <0.001  | 34.77 ± 8.28              | 38.04 ± 7.22       | 0.203   |
| HbA1c (%)                               | 5.32 ± 0.30                | 5.76 ± 0.60           | <0.001  | 5.31 ± 0.31               | 5.65 ± 0.89        | 0.002   |
| Fasting blood sugar<br>(mg/dL)          | 90.01 ± 8.66               | 103.83 ± 19.55        | <0.001  | 91.52 ± 9.43              | 104.00 ± 22.05     | <0.001  |
| Ferritin (ng/mL)                        | 146.03 ± 94.00             | 165.27 ± 119.32       | <0.001  | 124.24 ± 81.76            | 113.93 ± 85.87     | 0.686   |
| Smoking<br>(n=3,727)                    |                            |                       | <0.001  |                           |                    | 0.033   |
| Never smoker                            | 10,002                     | 219                   |         | 81                        | 1                  |         |
| Ex-smoker                               | 6,359                      | 177                   |         | 34                        | 4                  |         |
| Current smoker                          | 13,308                     | 470                   |         | 66                        | 6                  |         |
| Alcohol (n=34,814)                      |                            |                       | 0.004   |                           |                    | >0.999  |
| No                                      | 3,540                      | 137                   |         | 5                         | 0                  |         |
| Yes                                     | 30,051                     | 886                   |         | 184                       | 11                 |         |
| Body mass index<br>(Kg/m <sup>2</sup> ) | 24.04 ± 3.04               | 25.88 ± 3.53          | <0.001  | 24.00 ± 3.20              | 26.78 ± 2.67       | 0.005   |
| Cadmium<br>concentration<br>(mg/dL)     | -                          | -                     | -       | 0.20 ± 0.26               | 0.17 ± 0.11        | 0.731   |
| Follow-up duration<br>(year)            | 5.61 ± 3.46                | 5.02 ± 3.67           | <0.001  | 6.96 ± 3.77               | 5.45 ± 4.76        | 0.207   |

1

**Table 2. Cox regression models: Crude and adjusted HRs of baseline characteristics predicting the development of type 2 diabetes mellitus**

|                                             | Crude            |         | Adjusted<br>(N=30,589) |         |
|---------------------------------------------|------------------|---------|------------------------|---------|
|                                             | HR (95% CI)      | P-value | HR (95% CI)            | P-value |
| <b>Age (year)</b>                           | 1.05 (1.04-1.06) | <0.001  | 1.01 (1.00-1.03)       | 0.012   |
| <b>HbA1c (%) × 10</b>                       | 1.54 (1.51-1.57) | <0.001  | 1.35 (1.32-1.39)       | <0.001  |
| <b>Fasting blood sugar (mg/dL)</b>          | 1.12 (1.11-1.12) | <0.001  | 1.07 (1.06-1.08)       | <0.001  |
| <b>Body mass index (Kg/m<sup>2</sup>)</b>   | 1.21 (1.19-1.22) | <0.001  | 1.10 (0.078-1.12)      | <0.001  |
| <b>Ferritin (ng/mL, reference: &lt;200)</b> | 2.25 (1.94-2.62) | <0.001  | 1.51 (1.28-1.79)       | <0.001  |
| <b>Lead exposure</b>                        | 1.05 (0.68-1.63) | 0.812   | 1.01 (0.58-1.77)       | 0.971   |
| <b>Cadmium exposure</b>                     | 1.08 (0.54-2.17) | 0.828   | 1.48 (0.61-3.55)       | 0.385   |
| <b>Smoking</b>                              |                  |         |                        |         |
| Ex-smoker                                   | 1.22 (0.98-1.51) | 0.071   | 1.05 (0.85-1.31)       | 0.634   |
| Current smoker                              | 1.61 (1.35-1.92) | <0.001  | 1.45 (1.22-1.73)       | <0.01   |
| <b>Drinking</b>                             | 0.83 (0.68-1.01) | 0.062   | 1.07 (0.53-2.17)       | 0.842   |

1

2

3

4

## References

1. Diamanti-Kandarakis E, Bourguignon JP, Giudice LC, Hauser R, Prins GS, Soto AM, Zoeller RT, Gore AC: **Endocrine-disrupting chemicals: an Endocrine Society scientific statement.** *Endocr Rev* 2009, **30**(4):293-342.
2. Hanna-Attisha M, LaChance J, Sadler RC, Champney Schnepf A: **Elevated Blood Lead Levels in Children Associated With the Flint Drinking Water Crisis: A Spatial Analysis of Risk and Public Health Response.** *Am J Public Health* 2016, **106**(2):283-290.
3. Feng W, Cui X, Liu B, Liu C, Xiao Y, Lu W, Guo H, He M, Zhang X, Yuan J *et al*: **Association of urinary metal profiles with altered glucose levels and diabetes risk: a population-based study in China.** *PloS one* 2015, **10**(4):e0123742.
4. Menke A, Guallar E, Cowie CC: **Metals in Urine and Diabetes in U.S. Adults.** *Diabetes* 2016, **65**(1):164-171.
5. Barregard L, Bergstrom G, Fagerberg B: **Cadmium exposure in relation to insulin production, insulin sensitivity and type 2 diabetes: a cross-sectional and prospective study in women.** *Environmental research* 2013, **121**:104-109.
6. Hansen AF, Simic A, Asvold BO, Romundstad PR, Midthjell K, Syversen T, Flaten TP: **Trace elements in early phase type 2 diabetes mellitus-A population-based study. The HUNT study in Norway.** *J Trace Elem Med Biol* 2017, **40**:46-53.
7. Moon SS: **Association of lead, mercury and cadmium with diabetes in the Korean population: the Korea National Health and Nutrition Examination Survey (KNHANES) 2009-2010.** *Diabet Med* 2013, **30**(4):e143-148.
8. Borne Y, Fagerberg B, Persson M, Sallsten G, Forsgard N, Hedblad B, Barregard L, Engstrom G: **Cadmium exposure and incidence of diabetes mellitus--results from the Malmo Diet and Cancer study.** *PloS one* 2014, **9**(11):e112277.
9. Forte G, Bocca B, Peruzzu A, Tolu F, Asara Y, Farace C, Oggiano R, Madeddu R: **Blood metals concentration in type 1 and type 2 diabetics.** *Biol Trace Elem Res* 2013, **156**(1-3):79-90.
10. Gerber PA, Rutter GA: **The Role of Oxidative Stress and Hypoxia in Pancreatic Beta-Cell Dysfunction in Diabetes Mellitus.** *Antioxid Redox Signal* 2017, **26**(10):501-518.
11. Kaneto H, Katakami N, Kawamori D, Miyatsuka T, Sakamoto K, Matsuoka TA, Matsuhisa M, Yamasaki Y: **Involvement of oxidative stress in the pathogenesis of diabetes.** *Antioxid Redox Signal* 2007, **9**(3):355-366.
12. Kubisch HM, Wang J, Bray TM, Phillips JP: **Targeted overexpression of Cu/Zn superoxide dismutase protects pancreatic beta-cells against oxidative stress.** *Diabetes* 1997, **46**(10):1563-1566.
13. Yen CC, Lu FJ, Huang CF, Chen WK, Liu SH, Lin-Shiau SY: **The diabetogenic effects of the combination of humic acid and arsenic: in vitro and in vivo studies.** *Toxicol Lett* 2007,

- 1  
2  
3  
4  
5 1 **172(3):91-105.**
- 6 2 14. Das KK, Das SN, Dhundasi SA: **Nickel, its adverse health effects & oxidative stress.** *Indian*  
7 3 *J Med Res* 2008, **128(4):412-425.**
- 8  
9 4 15. Izquierdo-Vega JA, Soto CA, Sanchez-Pena LC, De Vizcaya-Ruiz A, Del Razo LM:  
10 5 **Diabetogenic effects and pancreatic oxidative damage in rats subchronically exposed**  
11 6 **to arsenite.** *Toxicol Lett* 2006, **160(2):135-142.**
- 12  
13 7 16. Valko M, Morris H, Cronin MT: **Metals, toxicity and oxidative stress.** *Curr Med Chem* 2005,  
14 8 **12(10):1161-1208.**
- 15  
16 9 17. Kurata Y, Katsuta O, Doi T, Kawasuso T, Hiratsuka H, Tsuchitani M, Umemura T: **Chronic**  
17 10 **cadmium treatment induces islet B cell injury in ovariectomized cynomolgus monkeys.**  
18 11 *Jpn J Vet Res* 2003, **50(4):175-183.**
- 19  
20 12 18. Chen YW, Yang CY, Huang CF, Hung DZ, Leung YM, Liu SH: **Heavy metals, islet function**  
21 13 **and diabetes development.** *Islets* 2009, **1(3):169-176.**
- 22  
23 14 19. Khan AR, Awan FR: **Metals in the pathogenesis of type 2 diabetes.** *J Diabetes Metab*  
24 15 *Disord* 2014, **13(1):16.**
- 25  
26 16 20. Sharma B, Singh S, Siddiqi NJ: **Biomedical implications of heavy metals induced**  
27 17 **imbalances in redox systems.** *Biomed Res Int* 2014, **2014:640754.**
- 28  
29 18 21. Beyersmann D, Hartwig A: **Carcinogenic metal compounds: recent insight into molecular**  
30 19 **and cellular mechanisms.** *Arch Toxicol* 2008, **82(8):493-512.**
- 31  
32 20 22. Kajimoto Y, Matsuoka T, Kaneto H, Watada H, Fujitani Y, Kishimoto M, Sakamoto K,  
33 21 Matsuoka M, Kawamori R, Yamasaki Y *et al*: **Induction of glycation suppresses glucokinase**  
34 22 **gene expression in HIT-T15 cells.** *Diabetologia* 1999, **42(12):1417-1424.**
- 35  
36 23 23. Kaur B, Henry J: **Micronutrient status in type 2 diabetes: a review.** *Adv Food Nutr Res*  
37 24 2014, **71:55-100.**
- 38  
39 25 24. Siddiqui K, Bawazeer N, Joy SS: **Variation in macro and trace elements in progression of**  
40 26 **type 2 diabetes.** *ScientificWorldJournal* 2014, **2014:461591.**
- 41  
42 27 25. Ahamed M, Siddiqui MK: **Environmental lead toxicity and nutritional factors.** *Clin Nutr*  
43 28 2007, **26(4):400-408.**
- 44  
45 29 26. Flora SJ: **Structural, chemical and biological aspects of antioxidants for strategies against**  
46 30 **metal and metalloid exposure.** *Oxid Med Cell Longev* 2009, **2(4):191-206.**
- 47  
48 31 27. Walton FS, Harmon AW, Paul DS, Drobna Z, Patel YM, Styblo M: **Inhibition of insulin-**  
49 32 **dependent glucose uptake by trivalent arsenicals: possible mechanism of arsenic-**  
50 33 **induced diabetes.** *Toxicol Appl Pharmacol* 2004, **198(3):424-433.**
- 51  
52 34 28. Han JC, Park SY, Hah BG, Choi GH, Kim YK, Kwon TH, Kim EK, Lachal M, Jung CY, Lee W:  
53 35 **Cadmium induces impaired glucose tolerance in rat by down-regulating GLUT4**  
54 36 **expression in adipocytes.** *Arch Biochem Biophys* 2003, **413(2):213-220.**
- 55  
56 37 29. Somwar R, Koterski S, Sweeney G, Sciotti R, Djuric S, Berg C, Trevillyan J, Scherer PE,



- 1  
2  
3  
4  
5 1 Rondinone CM, Klip A: **A dominant-negative p38 MAPK mutant and novel selective**  
6 2 **inhibitors of p38 MAPK reduce insulin-stimulated glucose uptake in 3T3-L1 adipocytes**  
7 3 **without affecting GLUT4 translocation.** *The Journal of biological chemistry* 2002,  
8 4 **277(52):50386-50395.**
- 9 5 30. Souza K, Maddock DA, Zhang Q, Chen J, Chiu C, Mehta S, Wan Y: **Arsenite activation of**  
11 6 **P13K/AKT cell survival pathway is mediated by p38 in cultured human keratinocytes.**  
12 7 *Molecular medicine* 2001, **7(11):767-772.**
- 13 8 31. Zawalich WS, Zawalich KC: **A link between insulin resistance and hyperinsulinemia:**  
14 9 **inhibitors of phosphatidylinositol 3-kinase augment glucose-induced insulin secretion**  
15 10 **from islets of lean, but not obese, rats.** *Endocrinology* 2000, **141(9):3287-3295.**
- 16 11 32. Leasure JL, Giddabasappa A, Chaney S, Johnson JE, Jr., Pothakos K, Lau YS, Fox DA: **Low-**  
17 12 **level human equivalent gestational lead exposure produces sex-specific motor and**  
18 13 **coordination abnormalities and late-onset obesity in year-old mice.** *Environmental health*  
19 14 *perspectives* 2008, **116(3):355-361.**
- 20 15 33. Faulk C, Barks A, Sanchez BN, Zhang Z, Anderson OS, Peterson KE, Dolinoy DC: **Perinatal**  
21 16 **lead (Pb) exposure results in sex-specific effects on food intake, fat, weight, and insulin**  
22 17 **response across the murine life-course.** *PloS one* 2014, **9(8):e104273.**
- 23 18 34. Nie X, Wang N, Chen Y, Chen C, Han B, Zhu C, Chen Y, Xia F, Cang Z, Lu M *et al*: **Blood**  
24 19 **cadmium in Chinese adults and its relationships with diabetes and obesity.**  
25 20 *Environmental science and pollution research international* 2016, **23(18):18714-18723.**
- 26 21 35. Rothenberg SE, Korrnick SA, Fayad R: **The influence of obesity on blood mercury levels for**  
27 22 **U.S. non-pregnant adults and children: NHANES 2007-2010.** *Environmental research* 2015,  
28 23 **138:173-180.**
- 29 24 36. Padilla MA, Elobeid M, Ruden DM, Allison DB: **An examination of the association of**  
30 25 **selected toxic metals with total and central obesity indices: NHANES 99-02.** *International*  
31 26 *journal of environmental research and public health* 2010, **7(9):3332-3347.**
- 32 27 37. Lei LJ, Jin TY, Zhou YF: **[The effects of cadmium on the levels of insulin in smelters].**  
33 28 *Zhonghua Lao Dong Wei Sheng Zhi Ye Bing Za Zhi* 2006, **24(1):3-6.**
- 34 29 38. Serdar MA, Bakir F, Hasimi A, Celik T, Akin O, Kenar L, Aykut O, Yildirimkaya M: **Trace and**  
35 30 **toxic element patterns in nonsmoker patients with noninsulin-dependent diabetes**  
36 31 **mellitus, impaired glucose tolerance, and fasting glucose.** *Int J Diabetes Dev Ctries* 2009,  
37 32 **29(1):35-40.**
- 38 33 39. Afridi HI, Kazi TG, Brabazon D, Naher S, Talpur FN: **Comparative metal distribution in scalp**  
39 34 **hair of Pakistani and Irish referents and diabetes mellitus patients.** *Clin Chim Acta* 2013,  
40 35 **415:207-214.**
- 41 36 40. Jiang R, Manson JE, Meigs JB, Ma J, Rifai N, Hu FB: **Body iron stores in relation to risk of**  
42 37 **type 2 diabetes in apparently healthy women.** *JAMA* 2004, **291(6):711-717.**

- 1  
2  
3  
4  
5 1 41. Kim NS, Lee BK: **National estimates of blood lead, cadmium, and mercury levels in the**  
6 2 **Korean general adult population.** *Int Arch Occup Environ Health* 2011, **84**(1):53-63.  
7 3 42. Andrews PA: **Disorders of iron metabolism.** *N Engl J Med* 2000, **342**(17):1293; author reply  
8 4 1294.  
9 5 43. Oberley LW: **Free radicals and diabetes.** *Free Radic Biol Med* 1988, **5**(2):113-124.  
10 6 44. Lee DH, Lee IK, Song K, Steffes M, Toscano W, Baker BA, Jacobs DR, Jr.: **A strong dose-**  
11 7 **response relation between serum concentrations of persistent organic pollutants and**  
12 8 **diabetes: results from the National Health and Examination Survey 1999-2002.** *Diabetes*  
13 9 *Care* 2006, **29**(7):1638-1644.  
14 10 45. Hectors TL, Vanparys C, van der Ven K, Martens GA, Jorens PG, Van Gaal LF, Covaci A, De  
15 11 Coen W, Blust R: **Environmental pollutants and type 2 diabetes: a review of mechanisms**  
16 12 **that can disrupt beta cell function.** *Diabetologia* 2011, **54**(6):1273-1290.  
17 13 46. Enan E, Liu PC, Matsumura F: **2,3,7,8-Tetrachlorodibenzo-p-dioxin causes reduction of**  
18 14 **glucose transporting activities in the plasma membranes of adipose tissue and pancreas**  
19 15 **from the guinea pig.** *The Journal of biological chemistry* 1992, **267**(28):19785-19791.  
20 16 47. Longnecker MP, Michalek JE: **Serum dioxin level in relation to diabetes mellitus among**  
21 17 **Air Force veterans with background levels of exposure.** *Epidemiology* 2000, **11**(1):44-48.  
22 18 48. Henriksen GL, Ketchum NS, Michalek JE, Swaby JA: **Serum dioxin and diabetes mellitus in**  
23 19 **veterans of Operation Ranch Hand.** *Epidemiology* 1997, **8**(3):252-258.  
24 20 49. Steenland K, Piacitelli L, Deddens J, Fingerhut M, Chang LI: **Cancer, heart disease, and**  
25 21 **diabetes in workers exposed to 2,3,7,8-tetrachlorodibenzo-p-dioxin.** *J Natl Cancer Inst*  
26 22 1999, **91**(9):779-786.  
27  
28  
29  
30  
31  
32  
33  
34  
35  
36  
37  
38  
39  
40  
41  
42  
43  
44  
45  
46  
47  
48  
49  
50  
51  
52  
53  
54  
55  
56  
57  
58  
59  
60



Figure 1. Schematic flow diagram

124x89mm (300 x 300 DPI)

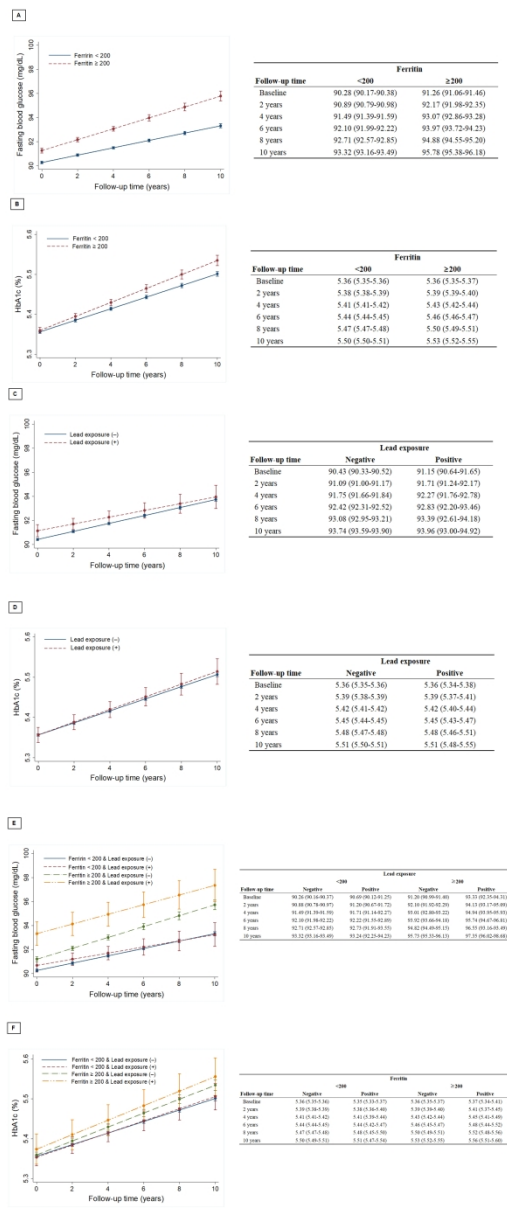

Figure 2. Mixed models were used to evaluate the effects of lead exposure and ferritin on FBS and HbA1c  
 A – Changes in fasting blood glucose according to serum ferritin levels in cohort A  
 B – Changes in HbA1c according to serum ferritin levels in cohort A  
 C – Changes in fasting blood glucose according to lead exposure in cohort A  
 D – Changes in HbA1c according to lead exposure in cohort A  
 E – Changes in fasting blood glucose according to serum ferritin levels and lead exposure in cohort A  
 F – Changes in HbA1c according to serum ferritin levels and lead exposure in cohort A

154x360mm (300 x 300 DPI)

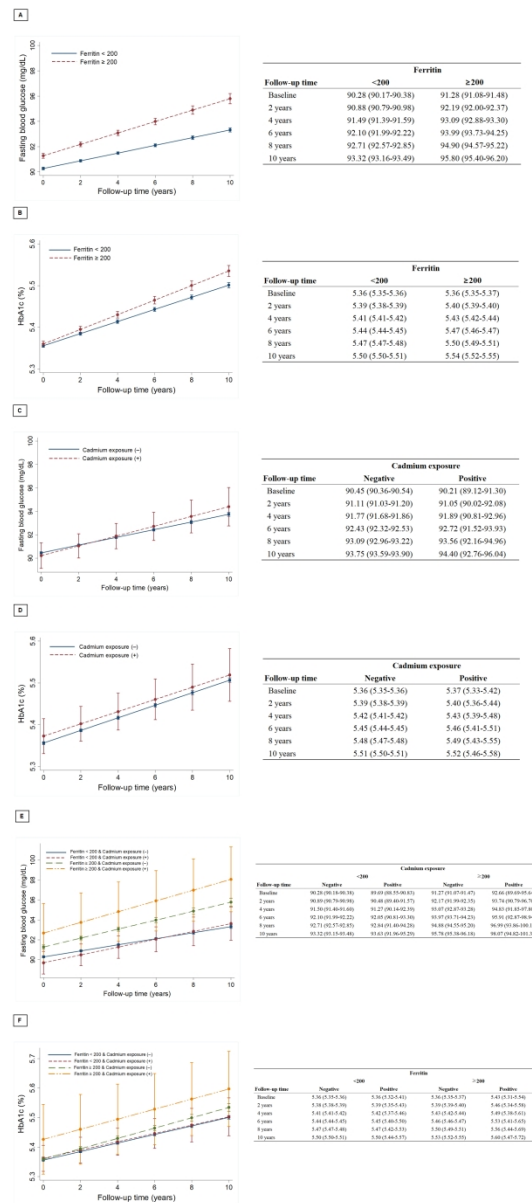

Figure 3. Mixed models were used to evaluate the effects of cadmium exposure and ferritin on FBS and HbA1c

A – Changes in fasting blood glucose according to serum ferritin levels in cohort B

B – Changes in HbA1c according to serum ferritin levels in cohort B

C– Changes in fasting blood glucose according to lead exposure in cohort B

D – Changes in HbA1c according to lead exposure in cohort B

E – Changes in fasting blood glucose according to serum ferritin levels and lead exposure in cohort B

F – Changes in HbA1c according to serum ferritin levels and lead exposure in cohort B

155x347mm (300 x 300 DPI)

1  
2  
3  
4  
5  
6  
7  
8  
9  
10  
11  
12  
13  
14  
15  
16  
17  
18  
19  
20  
21  
22  
23  
24  
25  
26  
27  
28  
29  
30  
31  
32  
33  
34  
35  
36  
37  
38  
39  
40  
41  
42  
43  
44  
45  
46  
47  
48  
49  
50  
51  
52  
53  
54  
55  
56  
57  
58  
59  
60



Figure 4. Scatter plot showing the annual changes of fasting blood glucose by lead concentration (r=0.072, p = 0.032)

99x67mm (300 x 300 DPI)

# Reporting checklist for cohort study.

Based on the STROBE cohort guidelines.

## Instructions to authors

Complete this checklist by entering the page numbers from your manuscript where readers will find each of the items listed below.

Your article may not currently address all the items on the checklist. Please modify your text to include the missing information. If you are certain that an item does not apply, please write "n/a" and provide a short explanation.

Upload your completed checklist as an extra file when you submit to a journal.

In your methods section, say that you used the STROBE cohort reporting guidelines, and cite them as:

von Elm E, Altman DG, Egger M, Pocock SJ, Gøtzsche PC, Vandenbroucke JP. The Strengthening of Reporting of Observational Studies in Epidemiology (STROBE) Statement: guidelines for reporting observational studies.

|                           |                                                                                                        | Page   |
|---------------------------|--------------------------------------------------------------------------------------------------------|--------|
|                           | Reporting Item                                                                                         | Number |
| <b>Title and abstract</b> |                                                                                                        |        |
| Title                     | <a href="#">#1a</a> Indicate the study's design with a commonly used term in the title or the abstract | 1      |

|    |                      |                     |                                                                 |   |
|----|----------------------|---------------------|-----------------------------------------------------------------|---|
| 1  | 1Abstract            | <a href="#">#1b</a> | Provide in the abstract an informative and balanced             | 2 |
| 2  |                      |                     |                                                                 |   |
| 3  |                      |                     |                                                                 |   |
| 4  |                      |                     | summary of what was done and what was found                     |   |
| 5  |                      |                     |                                                                 |   |
| 6  | <b>Introduction</b>  |                     |                                                                 |   |
| 7  |                      |                     |                                                                 |   |
| 8  |                      |                     |                                                                 |   |
| 9  |                      |                     |                                                                 |   |
| 10 | Background /         | <a href="#">#2</a>  | Explain the scientific background and rationale for the         | 4 |
| 11 |                      |                     |                                                                 |   |
| 12 | rationale            |                     | investigation being reported                                    |   |
| 13 |                      |                     |                                                                 |   |
| 14 |                      |                     |                                                                 |   |
| 15 | Objectives           | <a href="#">#3</a>  | State specific objectives, including any prespecified           | 5 |
| 16 |                      |                     |                                                                 |   |
| 17 |                      |                     | hypotheses                                                      |   |
| 18 |                      |                     |                                                                 |   |
| 19 |                      |                     |                                                                 |   |
| 20 | <b>Methods</b>       |                     |                                                                 |   |
| 21 |                      |                     |                                                                 |   |
| 22 |                      |                     |                                                                 |   |
| 23 | Study design         | <a href="#">#4</a>  | Present key elements of study design early in the paper         | 6 |
| 24 |                      |                     |                                                                 |   |
| 25 |                      |                     |                                                                 |   |
| 26 | Setting              | <a href="#">#5</a>  | Describe the setting, locations, and relevant dates, including  | 6 |
| 27 |                      |                     |                                                                 |   |
| 28 |                      |                     | periods of recruitment, exposure, follow-up, and data           |   |
| 29 |                      |                     | collection                                                      |   |
| 30 |                      |                     |                                                                 |   |
| 31 |                      |                     |                                                                 |   |
| 32 |                      |                     |                                                                 |   |
| 33 |                      |                     |                                                                 |   |
| 34 | Eligibility criteria | <a href="#">#6a</a> | Give the eligibility criteria, and the sources and methods of   | 6 |
| 35 |                      |                     |                                                                 |   |
| 36 |                      |                     | selection of participants. Describe methods of follow-up.       |   |
| 37 |                      |                     |                                                                 |   |
| 38 |                      |                     |                                                                 |   |
| 39 | Eligibility criteria | <a href="#">#6b</a> | For matched studies, give matching criteria and number of       | 6 |
| 40 |                      |                     |                                                                 |   |
| 41 |                      |                     | exposed and unexposed                                           |   |
| 42 |                      |                     |                                                                 |   |
| 43 |                      |                     |                                                                 |   |
| 44 |                      |                     |                                                                 |   |
| 45 | Variables            | <a href="#">#7</a>  | Clearly define all outcomes, exposures, predictors, potential   | 6 |
| 46 |                      |                     |                                                                 |   |
| 47 |                      |                     | confounders, and effect modifiers. Give diagnostic criteria, if |   |
| 48 |                      |                     | applicable                                                      |   |
| 49 |                      |                     |                                                                 |   |
| 50 |                      |                     |                                                                 |   |
| 51 |                      |                     |                                                                 |   |
| 52 |                      |                     |                                                                 |   |
| 53 | 8Data sources /      | <a href="#">#8</a>  | For each variable of interest give sources of data and details  | 6 |
| 54 |                      |                     |                                                                 |   |
| 55 | measurement          |                     | of methods of assessment (measurement). Describe                |   |
| 56 |                      |                     |                                                                 |   |
| 57 |                      |                     | comparability of assessment methods if there is more than       |   |
| 58 |                      |                     |                                                                 |   |
| 59 |                      |                     |                                                                 |   |
| 60 |                      |                     |                                                                 |   |



one group. Give information separately for for exposed and unexposed groups if applicable.

|    |                |                      |                                                               |
|----|----------------|----------------------|---------------------------------------------------------------|
| 1  |                |                      |                                                               |
| 2  |                |                      |                                                               |
| 3  |                |                      |                                                               |
| 4  |                |                      |                                                               |
| 5  |                |                      |                                                               |
| 6  | Bias           | <a href="#">#9</a>   | Describe any efforts to address potential sources of bias 6   |
| 7  |                |                      |                                                               |
| 8  |                |                      |                                                               |
| 9  | Study size     | <a href="#">#10</a>  | Explain how the study size was arrived at 6                   |
| 10 |                |                      |                                                               |
| 11 |                |                      |                                                               |
| 12 | Quantitative   | <a href="#">#11</a>  | Explain how quantitative variables were handled in the 6      |
| 13 |                |                      |                                                               |
| 14 | variables      |                      | analyses. If applicable, describe which groupings were        |
| 15 |                |                      |                                                               |
| 16 |                |                      |                                                               |
| 17 |                |                      | chosen, and why                                               |
| 18 |                |                      |                                                               |
| 19 | Statistical    | <a href="#">#12a</a> | Describe all statistical methods, including those used to 7   |
| 20 |                |                      |                                                               |
| 21 | methods        |                      | control for confounding                                       |
| 22 |                |                      |                                                               |
| 23 |                |                      |                                                               |
| 24 |                |                      |                                                               |
| 25 | Statistical    | <a href="#">#12b</a> | Describe any methods used to examine subgroups and 7          |
| 26 |                |                      |                                                               |
| 27 | methods        |                      | interactions                                                  |
| 28 |                |                      |                                                               |
| 29 |                |                      |                                                               |
| 30 | Statistical    | <a href="#">#12c</a> | Explain how missing data were addressed8 NA                   |
| 31 |                |                      |                                                               |
| 32 | methods        |                      |                                                               |
| 33 |                |                      |                                                               |
| 34 |                |                      |                                                               |
| 35 |                |                      |                                                               |
| 36 | Statistical    | <a href="#">#12d</a> | If applicable, explain how loss to follow-up was addressed NA |
| 37 |                |                      |                                                               |
| 38 | methods        |                      |                                                               |
| 39 |                |                      |                                                               |
| 40 |                |                      |                                                               |
| 41 | Statistical    | <a href="#">#12e</a> | Describe any sensitivity analyses 7                           |
| 42 |                |                      |                                                               |
| 43 | methods        |                      |                                                               |
| 44 |                |                      |                                                               |
| 45 |                |                      |                                                               |
| 46 | <b>Results</b> |                      |                                                               |
| 47 |                |                      |                                                               |
| 48 |                |                      |                                                               |
| 49 | Participants   | <a href="#">#13a</a> | Report numbers of individuals at each stage of study—eg 9     |
| 50 |                |                      |                                                               |
| 51 |                |                      | numbers potentially eligible, examined for eligibility,       |
| 52 |                |                      |                                                               |
| 53 |                |                      | confirmed eligible, included in the study, completing follow- |
| 54 |                |                      |                                                               |
| 55 |                |                      |                                                               |
| 56 |                |                      |                                                               |
| 57 |                |                      |                                                               |
| 58 |                |                      |                                                               |
| 59 |                |                      |                                                               |
| 60 |                |                      |                                                               |

up, and analysed. Give information separately for for  
exposed and unexposed groups if applicable.

|    |                  |                      |                                                                     |
|----|------------------|----------------------|---------------------------------------------------------------------|
| 1  |                  |                      |                                                                     |
| 2  |                  |                      |                                                                     |
| 3  |                  |                      |                                                                     |
| 4  |                  |                      |                                                                     |
| 5  |                  |                      |                                                                     |
| 6  | Participants     | <a href="#">#13b</a> | Give reasons for non-participation at each stage 9                  |
| 7  |                  |                      |                                                                     |
| 8  |                  |                      |                                                                     |
| 9  | Participants     | <a href="#">#13c</a> | Consider use of a flow diagram 6,9                                  |
| 10 |                  |                      |                                                                     |
| 11 |                  |                      | (fig.1)                                                             |
| 12 |                  |                      |                                                                     |
| 13 |                  |                      |                                                                     |
| 14 | Descriptive data | <a href="#">#14a</a> | Give characteristics of study participants (eg demographic, 9       |
| 15 |                  |                      |                                                                     |
| 16 |                  |                      | clinical, social) and information on exposures and potential        |
| 17 |                  |                      |                                                                     |
| 18 |                  |                      | confounders. Give information separately for exposed and            |
| 19 |                  |                      |                                                                     |
| 20 |                  |                      | unexposed groups if applicable.                                     |
| 21 |                  |                      |                                                                     |
| 22 |                  |                      |                                                                     |
| 23 |                  |                      |                                                                     |
| 24 | Descriptive data | <a href="#">#14b</a> | Indicate number of participants with missing data for each 9        |
| 25 |                  |                      |                                                                     |
| 26 |                  |                      | variable of interest                                                |
| 27 |                  |                      |                                                                     |
| 28 |                  |                      |                                                                     |
| 29 | Descriptive data | <a href="#">#14c</a> | Summarise follow-up time (eg, average and total amount) 9           |
| 30 |                  |                      |                                                                     |
| 31 |                  |                      |                                                                     |
| 32 | Outcome data     | <a href="#">#15</a>  | Report numbers of outcome events or summary measures 9              |
| 33 |                  |                      |                                                                     |
| 34 |                  |                      | over time. Give information separately for exposed and              |
| 35 |                  |                      |                                                                     |
| 36 |                  |                      | unexposed groups if applicable.                                     |
| 37 |                  |                      |                                                                     |
| 38 |                  |                      |                                                                     |
| 39 |                  |                      |                                                                     |
| 40 | Main results     | <a href="#">#16a</a> | Give unadjusted estimates and, if applicable, confounder- 9         |
| 41 |                  |                      |                                                                     |
| 42 |                  |                      | adjusted estimates and their precision (eg, 95% confidence          |
| 43 |                  |                      |                                                                     |
| 44 |                  |                      | interval). Make clear which confounders were adjusted for           |
| 45 |                  |                      |                                                                     |
| 46 |                  |                      | and why they were included                                          |
| 47 |                  |                      |                                                                     |
| 48 |                  |                      |                                                                     |
| 49 |                  |                      |                                                                     |
| 50 | Main results     | <a href="#">#16b</a> | Report category boundaries when continuous variables were 9         |
| 51 |                  |                      |                                                                     |
| 52 |                  |                      | categorized                                                         |
| 53 |                  |                      |                                                                     |
| 54 |                  |                      |                                                                     |
| 55 | Main results     | <a href="#">#16c</a> | If relevant, consider translating estimates of relative risk into 9 |
| 56 |                  |                      |                                                                     |
| 57 |                  |                      | absolute risk for a meaningful time period                          |
| 58 |                  |                      |                                                                     |
| 59 |                  |                      |                                                                     |
| 60 |                  |                      |                                                                     |

|    |                          |                     |                                                                |       |
|----|--------------------------|---------------------|----------------------------------------------------------------|-------|
| 1  | Other analyses           | <a href="#">#17</a> | Report other analyses done—e.g., analyses of subgroups         | 9-10  |
| 2  |                          |                     | and interactions, and sensitivity analyses                     |       |
| 3  |                          |                     |                                                                |       |
| 4  |                          |                     |                                                                |       |
| 5  |                          |                     |                                                                |       |
| 6  | <b>Discussion</b>        |                     |                                                                |       |
| 7  |                          |                     |                                                                |       |
| 8  |                          |                     |                                                                |       |
| 9  |                          |                     |                                                                |       |
| 10 | Key results              | <a href="#">#18</a> | Summarise key results with reference to study objectives       | 11    |
| 11 |                          |                     |                                                                |       |
| 12 |                          |                     |                                                                |       |
| 13 | Limitations              | <a href="#">#19</a> | Discuss limitations of the study, taking into account sources  | 13    |
| 14 |                          |                     | of potential bias or imprecision. Discuss both direction and   |       |
| 15 |                          |                     | magnitude of any potential bias.                               |       |
| 16 |                          |                     |                                                                |       |
| 17 |                          |                     |                                                                |       |
| 18 |                          |                     |                                                                |       |
| 19 |                          |                     |                                                                |       |
| 20 | Interpretation           | <a href="#">#20</a> | Give a cautious overall interpretation considering objectives, | 13    |
| 21 |                          |                     | limitations, multiplicity of analyses, results from similar    |       |
| 22 |                          |                     | studies, and other relevant evidence.                          |       |
| 23 |                          |                     |                                                                |       |
| 24 |                          |                     |                                                                |       |
| 25 |                          |                     |                                                                |       |
| 26 |                          |                     |                                                                |       |
| 27 |                          |                     |                                                                |       |
| 28 | Generalisability         | <a href="#">#21</a> | Discuss the generalisability (external validity) of the study  | 10-13 |
| 29 |                          |                     | results                                                        |       |
| 30 |                          |                     |                                                                |       |
| 31 |                          |                     |                                                                |       |
| 32 |                          |                     |                                                                |       |
| 33 | <b>Other Information</b> |                     |                                                                |       |
| 34 |                          |                     |                                                                |       |
| 35 |                          |                     |                                                                |       |
| 36 | Funding                  | <a href="#">#22</a> | Give the source of funding and the role of the funders for the | 16    |
| 37 |                          |                     | present study and, if applicable, for the original study on    |       |
| 38 |                          |                     | which the present article is based                             |       |
| 39 |                          |                     |                                                                |       |
| 40 |                          |                     |                                                                |       |
| 41 |                          |                     |                                                                |       |
| 42 |                          |                     |                                                                |       |
| 43 |                          |                     |                                                                |       |

None The STROBE checklist is distributed under the terms of the Creative Commons Attribution License CC-BY. This checklist can be completed online using <https://www.goodreports.org/>, a tool made by the [EQUATOR Network](#) in collaboration with [Penelope.ai](#)

# BMJ Open

## The relationship between heavy metal exposure and type 2 diabetes: A large-scale retrospective cohort study using occupational health examinations

|                                 |                                                                                                                                                                                                                                                                                                                                                                                                                                                                            |
|---------------------------------|----------------------------------------------------------------------------------------------------------------------------------------------------------------------------------------------------------------------------------------------------------------------------------------------------------------------------------------------------------------------------------------------------------------------------------------------------------------------------|
| Journal:                        | <i>BMJ Open</i>                                                                                                                                                                                                                                                                                                                                                                                                                                                            |
| Manuscript ID                   | bmjopen-2020-039541.R3                                                                                                                                                                                                                                                                                                                                                                                                                                                     |
| Article Type:                   | Original research                                                                                                                                                                                                                                                                                                                                                                                                                                                          |
| Date Submitted by the Author:   | 23-Jan-2021                                                                                                                                                                                                                                                                                                                                                                                                                                                                |
| Complete List of Authors:       | Ji, Jun Ho ; Samsung Changwon Hospital, Internal medicine<br>Jin, Mi Hyeon ; Samsung Changwon Hospital<br>Kang, Jung-Hun ; Gyeongsang National University College of Medicine, Internal Medicine<br>Lee, Soon Il ; Dankook University College of Medicine, Internal Medicine<br>Lee, Suee ; Dong-A University Medical Center, Internal medicine<br>Kim, Sung-Hyun ; Dong-A University Medical Center, Internal Medicine<br>Oh, Sung Yong; Dong-A University Medical Center |
| <b>Primary Subject Heading</b>: | Occupational and environmental medicine                                                                                                                                                                                                                                                                                                                                                                                                                                    |
| Secondary Subject Heading:      | Diabetes and endocrinology                                                                                                                                                                                                                                                                                                                                                                                                                                                 |
| Keywords:                       | Diabetes & endocrinology < INTERNAL MEDICINE, SOCIAL MEDICINE, EPIDEMIOLOGY                                                                                                                                                                                                                                                                                                                                                                                                |
|                                 |                                                                                                                                                                                                                                                                                                                                                                                                                                                                            |

SCHOLARONE™  
Manuscripts



I, the Submitting Author has the right to grant and does grant on behalf of all authors of the Work (as defined in the below author licence), an exclusive licence and/or a non-exclusive licence for contributions from authors who are: i) UK Crown employees; ii) where BMJ has agreed a CC-BY licence shall apply, and/or iii) in accordance with the terms applicable for US Federal Government officers or employees acting as part of their official duties; on a worldwide, perpetual, irrevocable, royalty-free basis to BMJ Publishing Group Ltd ("BMJ") its licensees and where the relevant Journal is co-owned by BMJ to the co-owners of the Journal, to publish the Work in this journal and any other BMJ products and to exploit all rights, as set out in our [licence](#).

The Submitting Author accepts and understands that any supply made under these terms is made by BMJ to the Submitting Author unless you are acting as an employee on behalf of your employer or a postgraduate student of an affiliated institution which is paying any applicable article publishing charge ("APC") for Open Access articles. Where the Submitting Author wishes to make the Work available on an Open Access basis (and intends to pay the relevant APC), the terms of reuse of such Open Access shall be governed by a Creative Commons licence – details of these licences and which [Creative Commons](#) licence will apply to this Work are set out in our licence referred to above.

Other than as permitted in any relevant BMJ Author's Self Archiving Policies, I confirm this Work has not been accepted for publication elsewhere, is not being considered for publication elsewhere and does not duplicate material already published. I confirm all authors consent to publication of this Work and authorise the granting of this licence.

1  
2  
3  
4 1 **The relationship between heavy metal exposure and type 2 diabetes: A**  
5  
6  
7 2 **large-scale retrospective cohort study using occupational health**  
8  
9 3 **examinations**

11 4 Jun Ho Ji<sup>1</sup>, Mi Hyeon Jin<sup>2</sup>, Jung-Hun Kang<sup>3</sup>, Soon Il Lee<sup>4</sup>,  
12  
13 5 Suee Lee<sup>5</sup>, Sung-Hyun Kim<sup>5</sup>, Sung Yong Oh<sup>5#</sup>  
14  
15 6

17 7  
18  
19  
20 8 <sup>1</sup>Department of Internal Medicine, Samsung Changwon Hospital, Sungkyunkwan University School of  
21  
22 9 Medicine, Changwon, Korea;

23  
24  
25 10 <sup>2</sup>Department of Biostatistics, Samsung Changwon Hospital, Sungkyunkwan University School of  
26  
27 11 Medicine, Changwon, Korea;

28  
29 12 <sup>3</sup>Department of Internal Medicine, Gyeongsang National University Scholl of Medicine, Jinju, Korea;

30  
31  
32 13 <sup>4</sup>Department of Internal Medicine, Dankook University College of Medicine, Cheonan;

33  
34 14 <sup>5</sup>Department of Internal Medicine, Dong-A University College of Medicine, Busan  
35  
36  
37 15

38  
39 16 **Running title:** Relationship between heavy metal exposure and diabetes

40  
41 17 **Word count:** 3424

42  
43  
44 18 **Corresponding author:** Sung Yong Oh

45  
46  
47 19 Address: Department of Internal Medicine, Dong-A University College of Medicine, 26 Daesingongwon-  
48  
49 20 Ro, Seo-Gu, Busan 49201, Korea

50  
51 21 Mobile: +82-10-8624-9818

52  
53  
54 22 E-mail: drosy@dau.ac.kr

## 1 Abstract

2 **Objectives:** To investigate the associations between heavy metal exposure and serum ferritin levels,  
3 physical measurements, and type 2 diabetes mellitus (DM).

4 **Design:** A retrospective cohort study.

5 **Setting:** Changwon, the location of this study, is a Korean representative industrial city. Data were  
6 obtained from medical check-ups between 2002 and 2018.

7 **Participants:** A total of 34,814 male subjects were included. Of them, 1,035 subjects with lead  
8 exposure, 200 subjects with cadmium exposure, and the 33,579 remaining were assigned to cohort A,  
9 cohort B, and the control cohort, respectively. Data including personal history of alcohol and smoking,  
10 age, height, weight, the follow-up duration, HbA1c, fasting blood sugar (FBS), ferritin levels, and lead  
11 and cadmium levels within one year after exposure were collected.

12 **Primary outcome measure:** In subjects without diabetes, changes in FBS and HbA1c were analyzed  
13 through repeated tests at intervals of one year or longer after the occupational exposure to heavy metals.

14 **Results:** In cohort A, DM was diagnosed in 33 subjects. There was a significant difference in lead  
15 concentrations between the subjects diagnosed with DM and those without DM during the follow-up  
16 period ( $3.94 \pm 2.92$  mg/dL versus  $2.81 \pm 2.03$  mg/dL,  $p = 0.002$ ). Simple exposure to heavy metals (lead  
17 and cadmium) was not associated with DM in Cox regression models (lead exposure hazard ratio [HR]  
18 1.01, 95% CI 0.58 – 1.77,  $p = 0.971$ ; cadmium exposure HR 1.48, 95% CI: 0.61 – 3.55,  $p = 0.385$ ). Annual  
19 changes in FBS according to lead concentration at the beginning of exposure showed a positive  
20 correlation ( $r = 0.072$ ,  $p = 0.032$ ).

21 **Conclusion:** Our findings demonstrated that simple occupational exposure to heavy metals lead and  
22 cadmium was not associated with the incidence of DM. However, lead concentrations at the beginning  
23 of the exposure might be an indicator of DM and glucose elevations.

24  
25 **Keywords:** diabetes, heavy metal exposure, HbA1c, body mass index, ferritin

## Strengths and limitations of this study

- This study was limited by the single institute data obtained from occupational medical evaluations.
- Another important limitation of the study was the exclusion of females of childbearing age who have decreased serum ferritin due to menstruation.
- This study was a large-scale study to determine the blood concentrations of heavy metals (initial exposure to occupational heavy metal and exposure over a long period of time) and changes in FBS and HbA1c levels.
- This study showed changes in blood glucose and HbA1c over time after exposure to heavy metals.



## 1 - Introduction

Diabetes mellitus (DM), a common and rising global problem, is one of the leading causes of death, blindness, and chronic renal failure. It is also a major risk factor for vascular diseases such as myocardial infarction, stroke, and peripheral vascular disease. The increase in social cost due to DM-related morbidity or mortality has intensified efforts to reduce the incidence of DM. The rising incidence of DM is considered to be associated with alterations in lifestyles and other contributing factors, including exposure to several environmental pollutants and industrial chemicals.

With rapid industrial development, exposure to various environmental toxic materials has risen along with DM incidence. Environmental substances that cause endocrine disruption have been defined as endocrine-disrupting chemicals (EDC) by the U.S. Environmental Protection Agency (EPA) [1]. Metals are naturally existing inorganic elements that are present in very small amounts in the body. They are essential for vital processes. Heavy metals are generally defined as metals with relatively high densities, atomic weights, or atomic numbers. Heavy metals and metalloids (e.g., lead, mercury, cadmium, and metalloid arsenic) can affect hormonal activity, suggesting that these compounds are EDCs generally considered to be toxicants. These heavy metals have negative effects on physiology. They might be associated with the incidence of DM in some populations. In this study, we particularly focused on the association between exposure to heavy metals and DM. In recent decades, environmental exposure to heavy metals has declined because many countries have begun to pay attention to environmental problems rather than industrial development. However, the unintended exposure to heavy metals in the environment such as older household structures and in drinking water in Flint, MI, USA [2], is still possible. Such exposure can be due to the illegal, unauthorized disposal of toxic materials including heavy metals from industries. In Korea, occupational exposure to heavy metals is more common than random environmental exposure.

In occupational exposure to heavy metals, relatively few studies have reported whether the degree of exposure has direct or indirect effects on the body or specific diseases. A few population-based studies have focused on the association between metal exposure and diabetes, showing inconsistent results [3-9]. Most previous studies have examined the association of DM with heavy metal

1 concentrations in the blood or urine at one specific time [6, 7].

2 Intense exposure to heavy metals can result in high levels of heavy metals in the blood or urine,  
3 whereas light exposure results in extremely low levels. Although long-term, light exposure to heavy  
4 metals might only lead to low levels of heavy metals in the blood or urine, heavy metals deposited in  
5 organs may be harmful. The deposition of heavy metals in the liver and pancreas can alter  
6 gluconeogenesis in the liver and affect insulin secretion, eventually influencing the incidence of DM.  
7 Although this study was designed as a retrospective study of long-term occupational exposure to heavy  
8 metals (lead and cadmium), instead of measuring the concentration of heavy metals in organs such as  
9 the liver, bone, and pancreas, the blood concentrations of heavy metals at the beginning of the exposure  
10 (within one year) were measured and compared to changes in FBS, HbA1c, and the incidence of DM  
11 in the general population who were not exposed to heavy metals during the same period.

## 1 **Material and Methods**

### 2 1) Study population

3 Changwon, the location of this study, is a representative industrial city in Korea. Many occupations  
4 involve heavy metal exposure, including employees of battery-manufacturing plants. This cohort study  
5 was based on the data from occupational health examinations ( $n = 403,253$ ) conducted from 2002 to  
6 2018 in subjects with jobs related to heavy metals. A schematic flow chart for the selection of subjects  
7 is shown in Figure 1. All participants underwent a physical examination with a blood sample taken in  
8 the morning following an overnight fast. They also filled out a questionnaire. Among these 403,253  
9 subjects, 89,826 who had ferritin blood levels measured were included and 38,039 women were  
10 excluded. In occupational screening, most women were fertile. The ferritin results might be low because  
11 of menstruation. A total of 269 subjects were excluded because of the unavailability of HbA1c or FBS  
12 data. Furthermore, 2709 subjects who were already diagnosed with DM were excluded (DM was  
13 defined as  $FBS \geq 126$  mg/dl,  $HbA1c \geq 6.5\%$ , or a history of DM reported in the questionnaire).  
14 Additionally, 28,151 subjects were excluded because they only had one screening result without follow-  
15 up data. Finally, 34,814 subjects were included in the analysis. Of these, 1,035 subjects with lead  
16 exposure, 200 subjects with cadmium exposure, and the 33,579 remaining subjects were assigned to  
17 cohort A, cohort B, and the control cohort, respectively. This study collected subject data including age,  
18 HbA1c, FBS, ferritin levels, height, body weight, the follow-up duration, and the concentrations of heavy  
19 metals (lead and cadmium). The study protocol was approved by the Institutional Review Board (IRB)  
20 of Samsung Changwon Medical Center (SCMC-2019-04-014). All participants provided written  
21 informed consent for the use of their data.

### 22 2) Data collection

23 This study was based on data from occupational health examinations already conducted. The health  
24 check-up data included objective numerical data such as blood tests, imaging tests, and physical  
25 examinations, as well as the questionnaire responses of the subjects. The questionnaire included items  
26 on personal history, physical activity, systemic symptoms, sleep patterns, stress, anxiety, depression,

1 gambling, and job stress. All data were computerized. The authors analysed the demographic  
2 information, physical examination results, past history, and laboratory results (HbA1c, blood glucose,  
3 ferritin, lead, and cadmium levels). After obtaining IRB approval, two authors (JHJ and MHJ)  
4 independently analysed the data.

### 5 3) Measuring blood levels of lead and cadmium

6 To measure the blood levels of lead and cadmium, 3 ml of blood was collected from each subject into  
7 vacuum bottles using heparin as an anticoagulant in the morning following an overnight fast. Blood  
8 samples were diluted 1:15 and 1:10 to measure the lead and cadmium concentrations, respectively,  
9 with 2.5 ml of 10% Triton X-100, 0.1 ml of concentrated nitric acid, and 1 ml of 10% ammonium di-  
10 hydrogen phosphate as a modifier. Graphite-furnace atomic absorption spectrometry with Zeeman  
11 background correction (PinAAcle 9i00z Atomic absorption spectrometer, PerkinElmer, Norwalk,  
12 Connecticut, USA) was used to measure the lead and cadmium levels in all subjects within the first year  
13 of heavy metal exposure. The minimum detectable limits of lead and cadmium were measured to the  
14 third decimal place (0.001mg/dl), and concentrations below that were considered to be zero.

### 15 4) Statistical analyses

16 The continuous variables are presented as means  $\pm$  standard deviation. The categorical variables are  
17 presented as the number of cases and percentages. An independent t-test was used to evaluate the  
18 significance of the mean differences between the continuous variables for demographical factors such  
19 as age and body mass index (BMI). The Cox proportional hazard model was used to identify potential  
20 predictors in the baseline characteristics for type 2 DM in subjects who were not diagnosed with DM. In  
21 the Cox hazard model, the development of type 2 DM was considered a dependent variable and as  
22 independent variables were set to the exposure levels of lead and cadmium and the known risk factors  
23 (age, BMI, smoking, drinking, HbA1c, FBS, and ferritin). A mixed model was used to assess the effects  
24 of heavy metal exposure and ferritin on FBS and HbA1c, respectively. The annual changes in FBS and  
25 HbA1c with lead concentrations are shown in a scatter plot. Stata 14.0 software (Stata Corporation,  
26 College Station, TX, USA) was used for all statistical analyses.

1  
2  
3  
4 1 5) Operational definitions  
5

6  
7 2 1. Type 2 DM was defined in patients with a diabetes diagnosis history taking anti-diabetic  
8  
9 3 medication or satisfying the American Diabetes Association (ADA) criteria of HbA1c  $\geq$  6.5%  
10  
11 4 or FBS  $\geq$  126 mg/dl in a blood test after an 8-hour fast.  
12

13  
14 5 2. Newly diagnosed diabetes was defined in subjects without a history of diabetes who had an  
15  
16 6 HbA1c of  $<$  6.5% and an FBS of  $<$  100 mg/dl in the first health check-up after joining the  
17  
18 7 company and were newly diagnosed with diabetes (HbA1c  $\geq$  6.5% or FBS  $\geq$  126 mg/dl) in  
19  
20 8 a follow-up health check-up conducted at least one year later.  
21

22  
23 9 3. The heavy metal exposure subjects were those who worked in the lead industry, those who  
24  
25 10 were in charge of lead welding and mounting in shipyards, and subjects who worked in Ni-Cd  
26  
27 11 battery manufacturing factories.  
28

29  
30 12 4. Simple occupational exposure to lead or cadmium, called simple exposure, referred to subjects  
31  
32 13 who worked on-site at the workplace regardless of the intensity of the exposure.  
33

34 14 5. The beginning of exposure referred to the first occupational health examination conducted  
35  
36 15 within a year of working in the workplace related to heavy metal exposure.  
37

38  
39 16 6) Patient and public involvement  
40

41 17 The patients and the public were not involved in the development of the research question or the design  
42  
43 18 of the study. No patients or public members were involved in the recruitment or conduct of the study.  
44  
45 19 Since this study used de-identified results, the authors do not plan to disseminate the study results to  
46  
47 20 the study participants individually but plan to publish the paper with open access.  
48

49  
50 21

51  
52 22

53  
54 23

55  
56 24  
57

## Results

### 1) Baseline characteristics of the study subjects

The baseline characteristics of the subjects in each cohort are shown in Table 1. Of 34,818 subjects, 1,034 were diagnosed with DM during the follow-up and 33,780 were not diagnosed with DM. In cohort A (1,035 subjects with lead-exposure and 33,779 subjects with no lead exposure), 1,034 were confirmed to have DM. Of these 1,034 subjects, 33 were exposed to lead. In the control group without heavy metal exposure, age, HbA1c, FBS, and ferritin levels were associated with DM, as expected. In heavy metal-exposed subjects, only HbA1c, FBS, and BMI were significantly associated with DM. An interesting aspect in cohort A was that the initial concentration of lead (within one year) was significantly higher in subjects who were later diagnosed with DM ( $2.81 \pm 2.03$  mg/dL in patients not diagnosed with diabetes and  $3.94 \pm 2.92$  mg/dL in patients diagnosed with diabetes,  $p = 0.002$ ). In contrast, the early cadmium blood levels did not differ between the group of subjects progressing to DM and those who did not progress to DM. The rates of drinking and smoking in patients with diabetes was similar to that in previous studies. Overall, the incidence of diabetes was higher in drinkers than in non-drinkers and higher in smokers than in ex-smokers or never smokers. However, the total number of subjects exposed to heavy metals was small, resulting in no statistical significance. The follow-up period was shorter and the mean age was higher in subjects progressing to DM in both cohorts. In the lead-exposed group, the mean follow-up duration was  $3.18 \pm 3.63$  years for the group with DM and  $4.78 \pm 2.77$  years ( $p = 0.001$ ) for the non-diabetes group. In the cadmium-exposed group, the mean follow-up duration was  $5.45 \pm 4.76$  years for the DM group and  $6.96 \pm 3.77$  years ( $p = 0.207$ ) for the non-diabetes group.

### 2) Risk of developing DM from lead/cadmium exposure and serum ferritin levels

The Cox-regression models showed the crude and adjusted hazard ratios of the variables predicting the development of DM (Table 2). Age, HbA1c, FBS, BMI, current smoking, and ferritin were predictors for developing DM in both the crude and adjusted models. However, simple exposure to lead or cadmium was not associated with DM. Ferritin levels had a positive relationship with FBS and HbA1c elevations during the follow-up period in both cohorts A and B (Figures 2-A, 2-B, 3-A, 3-B). FBS elevations in subjects with simple lead exposure were slower than in those without lead exposure

1  
2  
3  
4 1 (Figure 2-C). However, simple lead exposure did not have a significant effect on HbA1c elevation  
5  
6 2 (Figure 2-D). The association of early cadmium exposure on the FBS/HbA1c change was not different  
7  
8 3 from that of lead. In cohort B, ferritin also had significant effects on the elevation of FBS and HbA1c  
9  
10 4 (Figure 3-A, Figure 3-B). Early exposure to cadmium was positively correlated with the rate of FBS  
11  
12 5 change but negatively correlated with HbA1c change (Figures 3-C, 3-D). The unusual finding in both  
13  
14 6 cohorts was that all subjects were healthy, without DM at the time of enrolment. However, subjects with  
15  
16 7 elevated ferritin and heavy metal exposure had higher baseline FBS and HbA1c values than those who  
17  
18 8 did not (Figures 2-E, 2-F, 3-E, 3-F). Regarding the concentrations of heavy metals, annual variations in  
19  
20 9 FBS according to the initial lead concentrations showed weak but positive correlations ( $r = 0.072$ ,  $p =$   
21  
22 10  $0.032$ , Figure 4).

## 1 Discussion

2 Many studies have attempted to explain the relationship between heavy metal exposure and  
3 hyperglycaemia. Several plausible hypotheses have resulted from such research. First, oxidative stress  
4 caused by heavy metals can directly damage beta cells of the pancreas, leading to elevated serum  
5 glucose levels [10-17]. Such oxidative stress may also increase blood glucose levels by decreasing  
6 insulin release, impairing insulin receptors, disrupting glucose uptake, increasing hepatic  
7 gluconeogenesis and pancreatic glucagon secretion, and decreasing peripheral glucose use [16, 18-  
8 22]. Another hypothesis is related to the competitive inhibition of toxic metals. It states that essential  
9 trace metals at normal levels play a key role in glucose homeostasis because these metals are essential  
10 cofactors for glucose metabolism, pancreatic beta-cell function, and the insulin signalling cascade [18,  
11 19, 23, 24]. Toxic metals compete with these essential metals for various physiological functions and  
12 affect type 2 DM risk [25, 26]. It has also been reported that toxic metals can affect various substances,  
13 including glucose transporter type 4, nuclear factor kappa B, mitogen-activated protein kinases, and  
14 phosphoinositide 3-kinase involved in insulin signalling, thereby increasing the risk of DM [27-31]. The  
15 last hypothesis is that exposure to metals, especially heavy metals, can increase body weight, a theory  
16 based on population studies. Because weight gain is a known risk factor for DM, exposure to heavy  
17 metals might be associated with DM [32-36]. Many studies on the relationship between heavy metal  
18 exposure and DM have been performed based on these findings. However, they showed inconsistent  
19 results [3-9]. Thus, it can be inferred that a direct association between heavy metals and DM has not  
20 yet been confirmed. Even if such association is relevant, it is very weak. The prior epidemiologic studies  
21 reporting inconsistent results connecting heavy metals to DM have limitations. Most previous studies  
22 had cross-sectional designs [3-5, 7-9]. A cross-sectional study is characterized by an analysis  
23 conducted at a specific point in time. It does not reflect changes over time. In the case of heavy metal  
24 exposure, chronic long-time exposure is more common than acute exposure. Therefore, the time of  
25 exposure to heavy metals is important. The time elapsed since the first exposure should be also  
26 considered. A Chinese study reported that insulin secretion was decreased more in the group exposed  
27 to cadmium for more than 10 years than in the group exposed to cadmium for less than 10 years [37].  
28 Previous studies have also been conducted with a case-control design [3, 9, 38, 39]. It is well-known



1  
2  
3  
4 1 that a small case-control study tends to be less expensive and shorter in duration. However, it has a  
5  
6 2 low level of evidence.

7  
8  
9 3 This study investigated the relationships between serum ferritin levels, exposure to heavy metals, and  
10  
11 4 DM during the health screening of subjects who worked in battery, paint, and bullet manufacturing  
12  
13 5 facilities, shipyards, or workplaces requiring welding. Although this study included data from a single  
14  
15 6 institution, it was designed as a retrospective longitudinal study using a large number of health  
16  
17 7 screening subjects, thus overcoming the limitations of prior studies. The following results were obtained.  
18  
19 8 (1) Simple exposure to heavy metals did not increase the risk of developing DM over time. However,  
20  
21 9 the concentration of lead at the time of initial lead exposure was higher in subjects later diagnosed with  
22  
23 10 DM. (2) Serum ferritin was a predictor of DM, as previously reported [40]. However, serum ferritin was  
24  
25 11 not a predictor of DM in subjects exposed to lead or cadmium. (3) A high blood lead concentration at  
26  
27 12 the beginning of the lead exposure was proportional to the rate of increase in FBS per year. It was  
28  
29 13 noteworthy that when the blood lead concentration measured within a year after exposure was high,  
30  
31 14 the rate of FBS increased gradually with time. A high blood lead concentration means that the lead  
32  
33 15 exposure intensity is strong in a short time. Thus, lead exposure intensity might be a risk factor for DM.  
34  
35 16 This aligns with our other study results, in which simple exposure to heavy metals was not related to  
36  
37 17 the incidence of DM or elevations in FBS and HbA1c. The concentrations of heavy metals in our cohort  
38  
39 18 were slightly higher than those in the Korean general adult population in a demographic study on  
40  
41 19 environmental exposure to heavy metals by Kim et al. [41]. This suggests that our cohort was  
42  
43 20 occupationally exposed to heavy metals. However, their exposure intensity was not high enough to  
44  
45 21 significantly affect the incidence of DM. Similar to our results, a Korean study demonstrated that low-  
46  
47 22 dose lifetime environmental exposure to lead and cadmium might not affect the incidence of DM.  
48  
49 23 Another interesting aspect of this study is shown in Table 1. In the lead- and cadmium-exposed groups,  
50  
51 24 serum ferritin levels in the group with diabetes were significantly higher than those in the non-diabetes  
52  
53 25 group, but not in subjects exposed to lead or cadmium (serum ferritin was lower in the diabetes group).  
54  
55 26 The reason for these results cannot be precisely explained. Oxidative stress caused by the production  
56  
57 27 of free radicals [12-16,18], a mechanism by which heavy metals cause DM, might be the mechanism  
58  
59 28 involved in the development of DM [42, 43]. Some large-scale US studies have shown that high blood

1  
2  
3  
4 1 levels of persistent organic pollutants (POPs), which are not heavy metals but bio-accumulate as heavy  
5  
6 2 metals with chronic environmental exposure globally, pose an increased risk for DM [44]. The  
7  
8 3 mechanism by which POPs induce DM is similar to that for DM induced by heavy metals [45, 46]. Similar  
9  
10 4 to studies on the associations of heavy metals and DM, studies on the associations of POPs with DM  
11  
12 5 also showed discrepant results [47-49].  
13

14 6 The current findings should be interpreted with caution because of several limitations. Since this study  
15  
16 7 was based on data from subjects undergoing health check-ups, we could not identify or analyse the risk  
17  
18 8 factors of DM, including hypertension, family history, and dyslipidaemia. The second limitation was that  
19  
20 9 the blood concentrations of heavy metals were measured only once at the beginning of the exposure.  
21  
22 10 Follow-up observations such as the diagnosis of DM were done longitudinally without reflecting changes  
23  
24 11 in the serum concentrations of heavy metals as in a cross-sectional study. The limited study cohort  
25  
26 12 population was another limitation. Because of possible iron deficiency during menstruation, female  
27  
28 13 subjects were excluded. Due to the nature of the industry dealing with heavy metals, it is a limited study  
29  
30 14 cohort to include only young subjects in the study. Although this study excluded female subjects, it  
31  
32 15 would be interesting to investigate the relationship between occupational heavy metal exposure and  
33  
34 16 diabetes in women. Although menstruation can cause iron deficiency, serum ferritin is associated with  
35  
36 17 the risk of developing diabetes in fertile women [40]. Thus, further studies with female subjects are  
37  
38 18 warranted.  
39

40 19 In conclusion, our findings demonstrated that simple exposure to lead or cadmium was not associated  
41  
42 20 with the prevalence of DM. However, blood lead concentrations at the beginning of exposure might be  
43  
44 21 a predictor of DM development and glucose elevations. Our results suggest that low-dose, chronic  
45  
46 22 occupational exposure to lead or cadmium may not affect the incidence of DM. However, if the exposure  
47  
48 23 intensity is high, screening for DM should be performed.  
49

50 24

51 25

52 26

1  
2  
3  
4  
5  
6  
7  
8  
9  
10  
11  
12  
13  
14  
15  
16  
17  
18  
19  
20  
21  
22  
23  
24  
25  
26  
27  
28  
29  
30  
31  
32  
33  
34  
35  
36  
37  
38  
39  
40  
41  
42  
43  
44  
45  
46  
47  
48  
49  
50  
51  
52  
53  
54  
55  
56  
57  
58  
59  
60

1 **A competing interests statement:** Non declared

2

For peer review only

1  
2  
3  
4 **1 Authors' contribution:**  
5

6  
7 **2** Conception or design: JHJ

8  
9 **3** Acquisition, analysis, or interpretation of data: JHJ

10  
11 **4** Drafting the work or revising: JHJ,MHJ,JHK,SIL,SL,SHK,SYO

12  
13 **5** Final approval of the manuscript: JHJ,MHJ,JHK,SIL,SL,SHK,SYO  
14

15 **6**  
16

17 **7**  
18

19  
20 **8**  
21

22  
23 **9**  
24

25 **10**  
26  
27  
28  
29  
30  
31  
32  
33  
34  
35  
36  
37  
38  
39  
40  
41  
42  
43  
44  
45  
46  
47  
48  
49  
50  
51  
52  
53  
54  
55  
56  
57  
58  
59  
60

For peer review only

1  
2  
3  
4  
5  
6  
7  
8  
9  
10  
11  
12  
13  
14  
15  
16  
17  
18  
19  
20  
21  
22  
23  
24  
25  
26  
27  
28  
29  
30  
31  
32  
33  
34  
35  
36  
37  
38  
39  
40  
41  
42  
43  
44  
45  
46  
47  
48  
49  
50  
51  
52  
53  
54  
55  
56  
57  
58  
59  
60

1 **A funding statement:** This study was supported by Dong-A University Research fund 2020.

2

3 **Acknowledgements:** Thanks to all the patients who participated in this study.

4

5 **Data availability:** Extra data can be accessed via the Dryad data repository at <http://datadryad.org/>  
6 with the doi: 10.5061/dryad.tht76hdz4

7

8

9

10

11

12

13

14

15

16

17

For peer review only

1  
2  
3  
4 = **Figure legends** =  
5

6  
7 **Figure 1.** Schematic flow diagram  
8

9 **Figure 2.** Mixed models were used to evaluate the effects of lead exposure and ferritin on FBS and  
10 HbA1c  
11

12  
13  
14 A – Changes in fasting blood glucose according to serum ferritin levels in cohort A  
15

16 B – Changes in HbA1c according to serum ferritin levels in cohort A  
17

18  
19 C – Changes in fasting blood glucose according to lead exposure in cohort A  
20

21 D – Changes in HbA1c according to lead exposure in cohort A  
22

23  
24 E – Changes in fasting blood glucose according to serum ferritin levels and lead exposure in cohort A  
25

26  
27 F – Changes in HbA1c according to serum ferritin levels and lead exposure in cohort A  
28

29 **Figure 3.** Mixed models were used to evaluate the effects of cadmium exposure and ferritin on FBS  
30 and HbA1c  
31

32  
33  
34 A – Changes in fasting blood glucose according to serum ferritin levels in cohort B  
35

36 B – Changes in HbA1c according to serum ferritin levels in cohort B  
37

38  
39 C – Changes in fasting blood glucose according to lead exposure in cohort B  
40

41 D – Changes in HbA1c according to lead exposure in cohort B  
42

43  
44 E – Changes in fasting blood glucose according to serum ferritin levels and lead exposure in cohort B  
45

46  
47 F – Changes in HbA1c according to serum ferritin levels and lead exposure in cohort B  
48

49 **Figure 4.** Scatter plot showing the annual changes of fasting blood glucose by lead concentration  
50  
51 ( $r=0.072$ ,  $p = 0.032$ )  
52  
53  
54  
55  
56  
57

1  
2  
3  
4  
5  
6  
7  
8  
9  
10  
11  
12  
13  
14  
15  
16  
17  
18  
19  
20  
21  
22  
23  
24  
25  
26  
27  
28  
29  
30  
31  
32  
33  
34  
35  
36  
37  
38  
39  
40  
41  
42  
43  
44  
45  
46  
47  
48  
49  
50  
51  
52  
53  
54  
55  
56  
57  
58  
59  
60

= Table legends =

1  
2  
3  
4  
5  
6

**Table1.** Baseline characteristics

**Table2.** Cox regression models: Crude and adjusted HRs of baseline characteristics predicting the development of type 2 diabetes mellitus

For peer review only

Table 1. Baseline characteristics

|                                         | Lead (Cohort A)            |                       |         |                           |                    |         |
|-----------------------------------------|----------------------------|-----------------------|---------|---------------------------|--------------------|---------|
|                                         | No exposure<br>(n=33,779)  |                       |         | Exposure<br>(n=1,035)     |                    |         |
|                                         | Non diabetes<br>(n=32,778) | Diabetes<br>(n=1,001) | P-value | Non diabetes<br>(n=1,002) | Diabetes<br>(n=33) | P-value |
| Age                                     | 34.99 ± 7.99               | 37.96 ± 8.16          | <0.001  | 32.18 ± 8.36              | 34.19 ± 7.92       | 0.174   |
| HbA1c (%)                               | 5.32 ± 0.30                | 5.76 ± 0.59           | <0.001  | 5.33 ± 0.29               | 5.88 ± 0.81        | <0.001  |
| Fasting blood sugar<br>(mg/dL)          | 89.98 ± 8.65               | 103.49 ± 18.90        | <0.001  | 91.37 ± 9.11              | 114.36 ± 32.71     | <0.001  |
| Ferritin (ng/mL)                        | 145.71 ± 93.76             | 165.55 ± 119.90       | <0.001  | 152.51 ± 99.86            | 139.77 ± 89.57     | 0.470   |
| Smoking<br>(n=3,727)                    |                            |                       | <0.001  |                           |                    | 0.511   |
| Never smoker                            | 9,716                      | 212                   |         | 367                       | 8                  |         |
| Ex-smoker                               | 6,210                      | 173                   |         | 183                       | 8                  |         |
| Current smoker                          | 12,958                     | 460                   |         | 416                       | 46                 |         |
| Alcohol (n=34,814)                      |                            |                       | 0.003   |                           |                    | 0.620   |
| No                                      | 3,515                      | 137                   |         | 30                        | 0                  |         |
| Yes                                     | 29,263                     | 864                   |         | 972                       | 33                 |         |
| Body mass index<br>(Kg/m <sup>2</sup> ) | 24.04 ± 3.03               | 25.89 ± 3.54          | <0.001  | 24.04 ± 3.17              | 26.04 ± 2.87       | <0.001  |
| Lead concentration<br>(mg/dL)           | -                          | -                     | -       | 2.81 ± 2.03               | 3.94 ± 2.92        | 0.002   |
| Follow-up duration<br>(year)            | 5.65 ± 3.48                | 5.09 ± 3.67           | <0.001  | 4.78 ± 2.77               | 3.18 ± 3.63        | 0.001   |
|                                         | Cadmium (Cohort B)         |                       |         |                           |                    |         |
|                                         | No exposure<br>(n=34,614)  |                       |         | Exposure<br>(n=200)       |                    |         |
|                                         | Non diabetes<br>(n=33,591) | Diabetes<br>(n=1,023) | P-value | Non diabetes<br>(n=189)   | Diabetes<br>(n=11) | P-value |
| Age                                     | 34.91 ± 8.02               | 37.84 ± 8.19          | <0.001  | 34.77 ± 8.28              | 38.04 ± 7.22       | 0.203   |
| HbA1c (%)                               | 5.32 ± 0.30                | 5.76 ± 0.60           | <0.001  | 5.31 ± 0.31               | 5.65 ± 0.89        | 0.002   |
| Fasting blood sugar<br>(mg/dL)          | 90.01 ± 8.66               | 103.83 ± 19.55        | <0.001  | 91.52 ± 9.43              | 104.00 ± 22.05     | <0.001  |
| Ferritin (ng/mL)                        | 146.03 ± 94.00             | 165.27 ± 119.32       | <0.001  | 124.24 ± 81.76            | 113.93 ± 85.87     | 0.686   |
| Smoking<br>(n=3,727)                    |                            |                       | <0.001  |                           |                    | 0.033   |
| Never smoker                            | 10,002                     | 219                   |         | 81                        | 1                  |         |
| Ex-smoker                               | 6,359                      | 177                   |         | 34                        | 4                  |         |
| Current smoker                          | 13,308                     | 470                   |         | 66                        | 6                  |         |
| Alcohol (n=34,814)                      |                            |                       | 0.004   |                           |                    | >0.999  |
| No                                      | 3,540                      | 137                   |         | 5                         | 0                  |         |
| Yes                                     | 30,051                     | 886                   |         | 184                       | 11                 |         |
| Body mass index<br>(Kg/m <sup>2</sup> ) | 24.04 ± 3.04               | 25.88 ± 3.53          | <0.001  | 24.00 ± 3.20              | 26.78 ± 2.67       | 0.005   |
| Cadmium<br>concentration<br>(mg/dL)     | -                          | -                     | -       | 0.20 ± 0.26               | 0.17 ± 0.11        | 0.731   |
| Follow-up duration<br>(year)            | 5.61 ± 3.46                | 5.02 ± 3.67           | <0.001  | 6.96 ± 3.77               | 5.45 ± 4.76        | 0.207   |

1



**Table 2. Cox regression models: Crude and adjusted HRs of baseline characteristics predicting the development of type 2 diabetes mellitus**

|                                             | Crude            |         | Adjusted<br>(N=30,589) |         |
|---------------------------------------------|------------------|---------|------------------------|---------|
|                                             | HR (95% CI)      | P-value | HR (95% CI)            | P-value |
| <b>Age (year)</b>                           | 1.05 (1.04-1.06) | <0.001  | 1.01 (1.00-1.03)       | 0.012   |
| <b>HbA1c (%) × 10</b>                       | 1.54 (1.51-1.57) | <0.001  | 1.35 (1.32-1.39)       | <0.001  |
| <b>Fasting blood sugar (mg/dL)</b>          | 1.12 (1.11-1.12) | <0.001  | 1.07 (1.06-1.08)       | <0.001  |
| <b>Body mass index (Kg/m<sup>2</sup>)</b>   | 1.21 (1.19-1.22) | <0.001  | 1.10 (0.078-1.12)      | <0.001  |
| <b>Ferritin (ng/mL, reference: &lt;200)</b> | 2.25 (1.94-2.62) | <0.001  | 1.51 (1.28-1.79)       | <0.001  |
| <b>Lead exposure</b>                        | 1.05 (0.68-1.63) | 0.812   | 1.01 (0.58-1.77)       | 0.971   |
| <b>Cadmium exposure</b>                     | 1.08 (0.54-2.17) | 0.828   | 1.48 (0.61-3.55)       | 0.385   |
| <b>Smoking</b>                              |                  |         |                        |         |
| Ex-smoker                                   | 1.22 (0.98-1.51) | 0.071   | 1.05 (0.85-1.31)       | 0.634   |
| Current smoker                              | 1.61 (1.35-1.92) | <0.001  | 1.45 (1.22-1.73)       | <0.01   |
| <b>Drinking</b>                             | 0.83 (0.68-1.01) | 0.062   | 1.07 (0.53-2.17)       | 0.842   |

1

2

3

4

## References

1. Diamanti-Kandarakis E, Bourguignon JP, Giudice LC, Hauser R, Prins GS, Soto AM, Zoeller RT, Gore AC: **Endocrine-disrupting chemicals: an Endocrine Society scientific statement.** *Endocr Rev* 2009, **30**(4):293-342.
2. Hanna-Attisha M, LaChance J, Sadler RC, Champney Schnepf A: **Elevated Blood Lead Levels in Children Associated With the Flint Drinking Water Crisis: A Spatial Analysis of Risk and Public Health Response.** *Am J Public Health* 2016, **106**(2):283-290.
3. Feng W, Cui X, Liu B, Liu C, Xiao Y, Lu W, Guo H, He M, Zhang X, Yuan J *et al*: **Association of urinary metal profiles with altered glucose levels and diabetes risk: a population-based study in China.** *PloS one* 2015, **10**(4):e0123742.
4. Menke A, Guallar E, Cowie CC: **Metals in Urine and Diabetes in U.S. Adults.** *Diabetes* 2016, **65**(1):164-171.
5. Barregard L, Bergstrom G, Fagerberg B: **Cadmium exposure in relation to insulin production, insulin sensitivity and type 2 diabetes: a cross-sectional and prospective study in women.** *Environmental research* 2013, **121**:104-109.
6. Hansen AF, Simic A, Asvold BO, Romundstad PR, Midthjell K, Syversen T, Flaten TP: **Trace elements in early phase type 2 diabetes mellitus-A population-based study. The HUNT study in Norway.** *J Trace Elem Med Biol* 2017, **40**:46-53.
7. Moon SS: **Association of lead, mercury and cadmium with diabetes in the Korean population: the Korea National Health and Nutrition Examination Survey (KNHANES) 2009-2010.** *Diabet Med* 2013, **30**(4):e143-148.
8. Borne Y, Fagerberg B, Persson M, Sallsten G, Forsgard N, Hedblad B, Barregard L, Engstrom G: **Cadmium exposure and incidence of diabetes mellitus--results from the Malmo Diet and Cancer study.** *PloS one* 2014, **9**(11):e112277.
9. Forte G, Bocca B, Peruzzu A, Tolu F, Asara Y, Farace C, Oggiano R, Madeddu R: **Blood metals concentration in type 1 and type 2 diabetics.** *Biol Trace Elem Res* 2013, **156**(1-3):79-90.
10. Gerber PA, Rutter GA: **The Role of Oxidative Stress and Hypoxia in Pancreatic Beta-Cell Dysfunction in Diabetes Mellitus.** *Antioxid Redox Signal* 2017, **26**(10):501-518.
11. Kaneto H, Katakami N, Kawamori D, Miyatsuka T, Sakamoto K, Matsuoka TA, Matsuhisa M, Yamasaki Y: **Involvement of oxidative stress in the pathogenesis of diabetes.** *Antioxid Redox Signal* 2007, **9**(3):355-366.
12. Kubisch HM, Wang J, Bray TM, Phillips JP: **Targeted overexpression of Cu/Zn superoxide dismutase protects pancreatic beta-cells against oxidative stress.** *Diabetes* 1997, **46**(10):1563-1566.
13. Yen CC, Lu FJ, Huang CF, Chen WK, Liu SH, Lin-Shiau SY: **The diabetogenic effects of the combination of humic acid and arsenic: in vitro and in vivo studies.** *Toxicol Lett* 2007,

- 1  
2  
3  
4  
5 1 **172(3):91-105.**
- 6 2 14. Das KK, Das SN, Dhundasi SA: **Nickel, its adverse health effects & oxidative stress.** *Indian*  
7 3 *J Med Res* 2008, **128(4):412-425.**
- 8  
9 4 15. Izquierdo-Vega JA, Soto CA, Sanchez-Pena LC, De Vizcaya-Ruiz A, Del Razo LM:  
10 5 **Diabetogenic effects and pancreatic oxidative damage in rats subchronically exposed**  
11 6 **to arsenite.** *Toxicol Lett* 2006, **160(2):135-142.**
- 12  
13 7 16. Valko M, Morris H, Cronin MT: **Metals, toxicity and oxidative stress.** *Curr Med Chem* 2005,  
14 8 **12(10):1161-1208.**
- 15  
16 9 17. Kurata Y, Katsuta O, Doi T, Kawasuso T, Hiratsuka H, Tsuchitani M, Umemura T: **Chronic**  
17 10 **cadmium treatment induces islet B cell injury in ovariectomized cynomolgus monkeys.**  
18 11 *Jpn J Vet Res* 2003, **50(4):175-183.**
- 19  
20 12 18. Chen YW, Yang CY, Huang CF, Hung DZ, Leung YM, Liu SH: **Heavy metals, islet function**  
21 13 **and diabetes development.** *Islets* 2009, **1(3):169-176.**
- 22  
23 14 19. Khan AR, Awan FR: **Metals in the pathogenesis of type 2 diabetes.** *J Diabetes Metab*  
24 15 *Disord* 2014, **13(1):16.**
- 25  
26 16 20. Sharma B, Singh S, Siddiqi NJ: **Biomedical implications of heavy metals induced**  
27 17 **imbalances in redox systems.** *Biomed Res Int* 2014, **2014:640754.**
- 28  
29 18 21. Beyersmann D, Hartwig A: **Carcinogenic metal compounds: recent insight into molecular**  
30 19 **and cellular mechanisms.** *Arch Toxicol* 2008, **82(8):493-512.**
- 31  
32 20 22. Kajimoto Y, Matsuoka T, Kaneto H, Watada H, Fujitani Y, Kishimoto M, Sakamoto K,  
33 21 Matsuhiya M, Kawamori R, Yamasaki Y *et al*: **Induction of glycation suppresses glucokinase**  
34 22 **gene expression in HIT-T15 cells.** *Diabetologia* 1999, **42(12):1417-1424.**
- 35  
36 23 23. Kaur B, Henry J: **Micronutrient status in type 2 diabetes: a review.** *Adv Food Nutr Res*  
37 24 2014, **71:55-100.**
- 38  
39 25 24. Siddiqui K, Bawazeer N, Joy SS: **Variation in macro and trace elements in progression of**  
40 26 **type 2 diabetes.** *ScientificWorldJournal* 2014, **2014:461591.**
- 41  
42 27 25. Ahamed M, Siddiqui MK: **Environmental lead toxicity and nutritional factors.** *Clin Nutr*  
43 28 2007, **26(4):400-408.**
- 44  
45 29 26. Flora SJ: **Structural, chemical and biological aspects of antioxidants for strategies against**  
46 30 **metal and metalloid exposure.** *Oxid Med Cell Longev* 2009, **2(4):191-206.**
- 47  
48 31 27. Walton FS, Harmon AW, Paul DS, Drobna Z, Patel YM, Styblo M: **Inhibition of insulin-**  
49 32 **dependent glucose uptake by trivalent arsenicals: possible mechanism of arsenic-**  
50 33 **induced diabetes.** *Toxicol Appl Pharmacol* 2004, **198(3):424-433.**
- 51  
52 34 28. Han JC, Park SY, Hah BG, Choi GH, Kim YK, Kwon TH, Kim EK, Lachaal M, Jung CY, Lee W:  
53 35 **Cadmium induces impaired glucose tolerance in rat by down-regulating GLUT4**  
54 36 **expression in adipocytes.** *Arch Biochem Biophys* 2003, **413(2):213-220.**
- 55  
56 37 29. Somwar R, Koterski S, Sweeney G, Sciotti R, Djuric S, Berg C, Trevillyan J, Scherer PE,

- 1  
2  
3  
4  
5 1 Rondinone CM, Klip A: **A dominant-negative p38 MAPK mutant and novel selective**  
6 2 **inhibitors of p38 MAPK reduce insulin-stimulated glucose uptake in 3T3-L1 adipocytes**  
7 3 **without affecting GLUT4 translocation.** *The Journal of biological chemistry* 2002,  
8 4 **277(52):50386-50395.**
- 9 5 30. Souza K, Maddock DA, Zhang Q, Chen J, Chiu C, Mehta S, Wan Y: **Arsenite activation of**  
11 6 **P13K/AKT cell survival pathway is mediated by p38 in cultured human keratinocytes.**  
12 7 *Molecular medicine* 2001, **7(11):767-772.**
- 13 8 31. Zawalich WS, Zawalich KC: **A link between insulin resistance and hyperinsulinemia:**  
14 9 **inhibitors of phosphatidylinositol 3-kinase augment glucose-induced insulin secretion**  
15 10 **from islets of lean, but not obese, rats.** *Endocrinology* 2000, **141(9):3287-3295.**
- 16 11 32. Leasure JL, Giddabasappa A, Chaney S, Johnson JE, Jr., Pothakos K, Lau YS, Fox DA: **Low-**  
17 12 **level human equivalent gestational lead exposure produces sex-specific motor and**  
18 13 **coordination abnormalities and late-onset obesity in year-old mice.** *Environmental health*  
19 14 *perspectives* 2008, **116(3):355-361.**
- 20 15 33. Faulk C, Barks A, Sanchez BN, Zhang Z, Anderson OS, Peterson KE, Dolinoy DC: **Perinatal**  
21 16 **lead (Pb) exposure results in sex-specific effects on food intake, fat, weight, and insulin**  
22 17 **response across the murine life-course.** *PloS one* 2014, **9(8):e104273.**
- 23 18 34. Nie X, Wang N, Chen Y, Chen C, Han B, Zhu C, Chen Y, Xia F, Cang Z, Lu M *et al*: **Blood**  
24 19 **cadmium in Chinese adults and its relationships with diabetes and obesity.**  
25 20 *Environmental science and pollution research international* 2016, **23(18):18714-18723.**
- 26 21 35. Rothenberg SE, Korrnick SA, Fayad R: **The influence of obesity on blood mercury levels for**  
27 22 **U.S. non-pregnant adults and children: NHANES 2007-2010.** *Environmental research* 2015,  
28 23 **138:173-180.**
- 29 24 36. Padilla MA, Elobeid M, Ruden DM, Allison DB: **An examination of the association of**  
30 25 **selected toxic metals with total and central obesity indices: NHANES 99-02.** *International*  
31 26 *journal of environmental research and public health* 2010, **7(9):3332-3347.**
- 32 27 37. Lei LJ, Jin TY, Zhou YF: **[The effects of cadmium on the levels of insulin in smelters].**  
33 28 *Zhonghua Lao Dong Wei Sheng Zhi Ye Bing Za Zhi* 2006, **24(1):3-6.**
- 34 29 38. Serdar MA, Bakir F, Hasimi A, Celik T, Akin O, Kenar L, Aykut O, Yildirimkaya M: **Trace and**  
35 30 **toxic element patterns in nonsmoker patients with noninsulin-dependent diabetes**  
36 31 **mellitus, impaired glucose tolerance, and fasting glucose.** *Int J Diabetes Dev Ctries* 2009,  
37 32 **29(1):35-40.**
- 38 33 39. Afridi HI, Kazi TG, Brabazon D, Naher S, Talpur FN: **Comparative metal distribution in scalp**  
39 34 **hair of Pakistani and Irish referents and diabetes mellitus patients.** *Clin Chim Acta* 2013,  
40 35 **415:207-214.**
- 41 36 40. Jiang R, Manson JE, Meigs JB, Ma J, Rifai N, Hu FB: **Body iron stores in relation to risk of**  
42 37 **type 2 diabetes in apparently healthy women.** *JAMA* 2004, **291(6):711-717.**

- 1  
2  
3  
4  
5 1 41. Kim NS, Lee BK: **National estimates of blood lead, cadmium, and mercury levels in the**  
6 2 **Korean general adult population.** *Int Arch Occup Environ Health* 2011, **84**(1):53-63.  
7 3 42. Andrews PA: **Disorders of iron metabolism.** *N Engl J Med* 2000, **342**(17):1293; author reply  
8 4 1294.  
9 5 43. Oberley LW: **Free radicals and diabetes.** *Free Radic Biol Med* 1988, **5**(2):113-124.  
10 6 44. Lee DH, Lee IK, Song K, Steffes M, Toscano W, Baker BA, Jacobs DR, Jr.: **A strong dose-**  
11 7 **response relation between serum concentrations of persistent organic pollutants and**  
12 8 **diabetes: results from the National Health and Examination Survey 1999-2002.** *Diabetes*  
13 9 *Care* 2006, **29**(7):1638-1644.  
14 10 45. Hectors TL, Vanparys C, van der Ven K, Martens GA, Jorens PG, Van Gaal LF, Covaci A, De  
15 11 Coen W, Blust R: **Environmental pollutants and type 2 diabetes: a review of mechanisms**  
16 12 **that can disrupt beta cell function.** *Diabetologia* 2011, **54**(6):1273-1290.  
17 13 46. Enan E, Liu PC, Matsumura F: **2,3,7,8-Tetrachlorodibenzo-p-dioxin causes reduction of**  
18 14 **glucose transporting activities in the plasma membranes of adipose tissue and pancreas**  
19 15 **from the guinea pig.** *The Journal of biological chemistry* 1992, **267**(28):19785-19791.  
20 16 47. Longnecker MP, Michalek JE: **Serum dioxin level in relation to diabetes mellitus among**  
21 17 **Air Force veterans with background levels of exposure.** *Epidemiology* 2000, **11**(1):44-48.  
22 18 48. Henriksen GL, Ketchum NS, Michalek JE, Swaby JA: **Serum dioxin and diabetes mellitus in**  
23 19 **veterans of Operation Ranch Hand.** *Epidemiology* 1997, **8**(3):252-258.  
24 20 49. Steenland K, Piacitelli L, Deddens J, Fingerhut M, Chang LI: **Cancer, heart disease, and**  
25 21 **diabetes in workers exposed to 2,3,7,8-tetrachlorodibenzo-p-dioxin.** *J Natl Cancer Inst*  
26 22 1999, **91**(9):779-786.  
27  
28  
29  
30  
31  
32  
33  
34  
35  
36  
37  
38  
39  
40  
41  
42  
43  
44  
45  
46  
47  
48  
49  
50  
51  
52  
53  
54  
55  
56  
57  
58  
59  
60

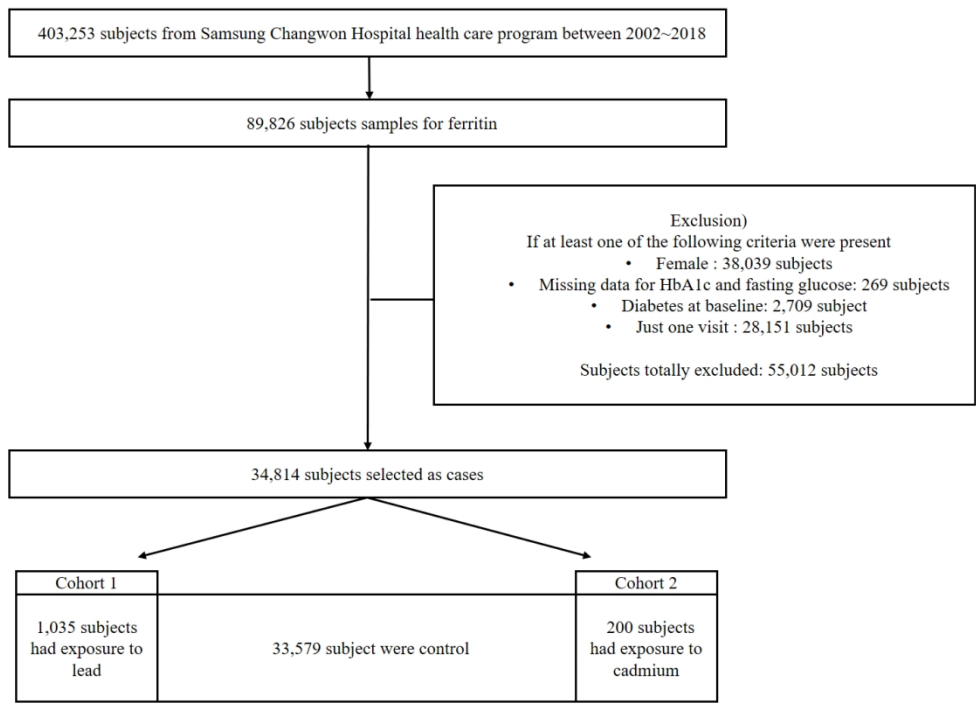

Figure 1. Schematic flow diagram

124x89mm (300 x 300 DPI)



Figure 2. Mixed models were used to evaluate the effects of lead exposure and ferritin on FBS and HbA1c  
 A – Changes in fasting blood glucose according to serum ferritin levels in cohort A  
 B – Changes in HbA1c according to serum ferritin levels in cohort A  
 C – Changes in fasting blood glucose according to lead exposure in cohort A  
 D – Changes in HbA1c according to lead exposure in cohort A  
 E – Changes in fasting blood glucose according to serum ferritin levels and lead exposure in cohort A  
 F – Changes in HbA1c according to serum ferritin levels and lead exposure in cohort A

154x360mm (300 x 300 DPI)



Figure 3. Mixed models were used to evaluate the effects of cadmium exposure and ferritin on FBS and HbA1c

A – Changes in fasting blood glucose according to serum ferritin levels in cohort B

B – Changes in HbA1c according to serum ferritin levels in cohort B

C– Changes in fasting blood glucose according to lead exposure in cohort B

D – Changes in HbA1c according to lead exposure in cohort B

E – Changes in fasting blood glucose according to serum ferritin levels and lead exposure in cohort B

F – Changes in HbA1c according to serum ferritin levels and lead exposure in cohort B

155x347mm (300 x 300 DPI)



1  
2  
3  
4  
5  
6  
7  
8  
9  
10  
11  
12  
13  
14  
15  
16  
17  
18  
19  
20  
21  
22  
23  
24  
25  
26  
27  
28  
29  
30  
31  
32  
33  
34  
35  
36  
37  
38  
39  
40  
41  
42  
43  
44  
45  
46  
47  
48  
49  
50  
51  
52  
53  
54  
55  
56  
57  
58  
59  
60

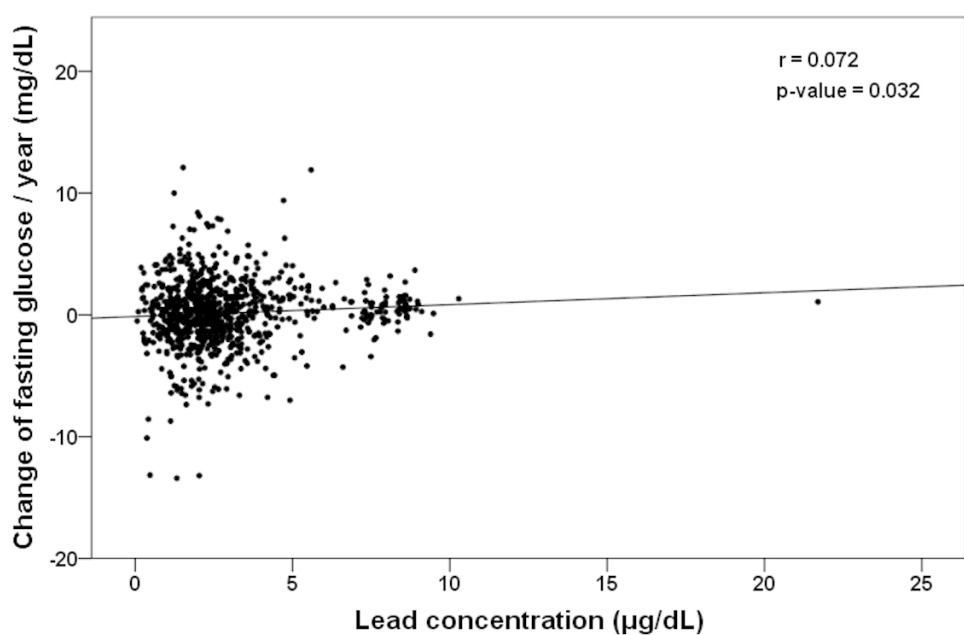

Figure 4. Scatter plot showing the annual changes of fasting blood glucose by lead concentration (r=0.072, p = 0.032)

99x67mm (300 x 300 DPI)

# Reporting checklist for cohort study.

Based on the STROBE cohort guidelines.

## Instructions to authors

Complete this checklist by entering the page numbers from your manuscript where readers will find each of the items listed below.

Your article may not currently address all the items on the checklist. Please modify your text to include the missing information. If you are certain that an item does not apply, please write "n/a" and provide a short explanation.

Upload your completed checklist as an extra file when you submit to a journal.

In your methods section, say that you used the STROBE cohort reporting guidelines, and cite them as:

von Elm E, Altman DG, Egger M, Pocock SJ, Gøtzsche PC, Vandenbroucke JP. The Strengthening of Reporting of Observational Studies in Epidemiology (STROBE) Statement: guidelines for reporting observational studies.

|                           |                                                                                                        | Page   |
|---------------------------|--------------------------------------------------------------------------------------------------------|--------|
|                           | Reporting Item                                                                                         | Number |
| <b>Title and abstract</b> |                                                                                                        |        |
| Title                     | <a href="#">#1a</a> Indicate the study's design with a commonly used term in the title or the abstract | 1      |

|    |                      |                     |                                                                 |   |
|----|----------------------|---------------------|-----------------------------------------------------------------|---|
| 1  | 1Abstract            | <a href="#">#1b</a> | Provide in the abstract an informative and balanced             | 2 |
| 2  |                      |                     |                                                                 |   |
| 3  |                      |                     |                                                                 |   |
| 4  |                      |                     | summary of what was done and what was found                     |   |
| 5  |                      |                     |                                                                 |   |
| 6  | <b>Introduction</b>  |                     |                                                                 |   |
| 7  |                      |                     |                                                                 |   |
| 8  |                      |                     |                                                                 |   |
| 9  |                      |                     |                                                                 |   |
| 10 | Background /         | <a href="#">#2</a>  | Explain the scientific background and rationale for the         | 4 |
| 11 |                      |                     |                                                                 |   |
| 12 | rationale            |                     | investigation being reported                                    |   |
| 13 |                      |                     |                                                                 |   |
| 14 |                      |                     |                                                                 |   |
| 15 | Objectives           | <a href="#">#3</a>  | State specific objectives, including any prespecified           | 5 |
| 16 |                      |                     |                                                                 |   |
| 17 |                      |                     | hypotheses                                                      |   |
| 18 |                      |                     |                                                                 |   |
| 19 |                      |                     |                                                                 |   |
| 20 | <b>Methods</b>       |                     |                                                                 |   |
| 21 |                      |                     |                                                                 |   |
| 22 |                      |                     |                                                                 |   |
| 23 | Study design         | <a href="#">#4</a>  | Present key elements of study design early in the paper         | 6 |
| 24 |                      |                     |                                                                 |   |
| 25 |                      |                     |                                                                 |   |
| 26 | Setting              | <a href="#">#5</a>  | Describe the setting, locations, and relevant dates, including  | 6 |
| 27 |                      |                     |                                                                 |   |
| 28 |                      |                     | periods of recruitment, exposure, follow-up, and data           |   |
| 29 |                      |                     |                                                                 |   |
| 30 |                      |                     | collection                                                      |   |
| 31 |                      |                     |                                                                 |   |
| 32 |                      |                     |                                                                 |   |
| 33 |                      |                     |                                                                 |   |
| 34 | Eligibility criteria | <a href="#">#6a</a> | Give the eligibility criteria, and the sources and methods of   | 6 |
| 35 |                      |                     |                                                                 |   |
| 36 |                      |                     | selection of participants. Describe methods of follow-up.       |   |
| 37 |                      |                     |                                                                 |   |
| 38 |                      |                     |                                                                 |   |
| 39 | Eligibility criteria | <a href="#">#6b</a> | For matched studies, give matching criteria and number of       | 6 |
| 40 |                      |                     |                                                                 |   |
| 41 |                      |                     | exposed and unexposed                                           |   |
| 42 |                      |                     |                                                                 |   |
| 43 |                      |                     |                                                                 |   |
| 44 |                      |                     |                                                                 |   |
| 45 | Variables            | <a href="#">#7</a>  | Clearly define all outcomes, exposures, predictors, potential   | 6 |
| 46 |                      |                     |                                                                 |   |
| 47 |                      |                     | confounders, and effect modifiers. Give diagnostic criteria, if |   |
| 48 |                      |                     |                                                                 |   |
| 49 |                      |                     | applicable                                                      |   |
| 50 |                      |                     |                                                                 |   |
| 51 |                      |                     |                                                                 |   |
| 52 |                      |                     |                                                                 |   |
| 53 | 8Data sources /      | <a href="#">#8</a>  | For each variable of interest give sources of data and details  | 6 |
| 54 |                      |                     |                                                                 |   |
| 55 | measurement          |                     | of methods of assessment (measurement). Describe                |   |
| 56 |                      |                     |                                                                 |   |
| 57 |                      |                     | comparability of assessment methods if there is more than       |   |
| 58 |                      |                     |                                                                 |   |
| 59 |                      |                     |                                                                 |   |
| 60 |                      |                     |                                                                 |   |

one group. Give information separately for for exposed and unexposed groups if applicable.

|    |                |                      |                                                               |
|----|----------------|----------------------|---------------------------------------------------------------|
| 1  |                |                      |                                                               |
| 2  |                |                      |                                                               |
| 3  |                |                      |                                                               |
| 4  |                |                      |                                                               |
| 5  |                |                      |                                                               |
| 6  | Bias           | <a href="#">#9</a>   | Describe any efforts to address potential sources of bias 6   |
| 7  |                |                      |                                                               |
| 8  |                |                      |                                                               |
| 9  | Study size     | <a href="#">#10</a>  | Explain how the study size was arrived at 6                   |
| 10 |                |                      |                                                               |
| 11 |                |                      |                                                               |
| 12 | Quantitative   | <a href="#">#11</a>  | Explain how quantitative variables were handled in the 6      |
| 13 |                |                      |                                                               |
| 14 | variables      |                      | analyses. If applicable, describe which groupings were        |
| 15 |                |                      |                                                               |
| 16 |                |                      |                                                               |
| 17 |                |                      | chosen, and why                                               |
| 18 |                |                      |                                                               |
| 19 | Statistical    | <a href="#">#12a</a> | Describe all statistical methods, including those used to 7   |
| 20 |                |                      |                                                               |
| 21 | methods        |                      | control for confounding                                       |
| 22 |                |                      |                                                               |
| 23 |                |                      |                                                               |
| 24 |                |                      |                                                               |
| 25 | Statistical    | <a href="#">#12b</a> | Describe any methods used to examine subgroups and 7          |
| 26 |                |                      |                                                               |
| 27 | methods        |                      | interactions                                                  |
| 28 |                |                      |                                                               |
| 29 |                |                      |                                                               |
| 30 | Statistical    | <a href="#">#12c</a> | Explain how missing data were addressed <sup>8</sup> NA       |
| 31 |                |                      |                                                               |
| 32 | methods        |                      |                                                               |
| 33 |                |                      |                                                               |
| 34 |                |                      |                                                               |
| 35 |                |                      |                                                               |
| 36 | Statistical    | <a href="#">#12d</a> | If applicable, explain how loss to follow-up was addressed NA |
| 37 |                |                      |                                                               |
| 38 | methods        |                      |                                                               |
| 39 |                |                      |                                                               |
| 40 |                |                      |                                                               |
| 41 | Statistical    | <a href="#">#12e</a> | Describe any sensitivity analyses 7                           |
| 42 |                |                      |                                                               |
| 43 | methods        |                      |                                                               |
| 44 |                |                      |                                                               |
| 45 |                |                      |                                                               |
| 46 | <b>Results</b> |                      |                                                               |
| 47 |                |                      |                                                               |
| 48 |                |                      |                                                               |
| 49 | Participants   | <a href="#">#13a</a> | Report numbers of individuals at each stage of study—eg 9     |
| 50 |                |                      |                                                               |
| 51 |                |                      | numbers potentially eligible, examined for eligibility,       |
| 52 |                |                      |                                                               |
| 53 |                |                      | confirmed eligible, included in the study, completing follow- |
| 54 |                |                      |                                                               |
| 55 |                |                      |                                                               |
| 56 |                |                      |                                                               |
| 57 |                |                      |                                                               |
| 58 |                |                      |                                                               |
| 59 |                |                      |                                                               |
| 60 |                |                      |                                                               |

up, and analysed. Give information separately for for  
exposed and unexposed groups if applicable.

|    |                  |                      |                                                                     |
|----|------------------|----------------------|---------------------------------------------------------------------|
| 1  |                  |                      |                                                                     |
| 2  |                  |                      |                                                                     |
| 3  |                  |                      |                                                                     |
| 4  |                  |                      |                                                                     |
| 5  |                  |                      |                                                                     |
| 6  | Participants     | <a href="#">#13b</a> | Give reasons for non-participation at each stage 9                  |
| 7  |                  |                      |                                                                     |
| 8  |                  |                      |                                                                     |
| 9  | Participants     | <a href="#">#13c</a> | Consider use of a flow diagram 6,9                                  |
| 10 |                  |                      |                                                                     |
| 11 |                  |                      | (fig.1)                                                             |
| 12 |                  |                      |                                                                     |
| 13 |                  |                      |                                                                     |
| 14 | Descriptive data | <a href="#">#14a</a> | Give characteristics of study participants (eg demographic, 9       |
| 15 |                  |                      |                                                                     |
| 16 |                  |                      | clinical, social) and information on exposures and potential        |
| 17 |                  |                      | confounders. Give information separately for exposed and            |
| 18 |                  |                      | unexposed groups if applicable.                                     |
| 19 |                  |                      |                                                                     |
| 20 |                  |                      |                                                                     |
| 21 |                  |                      |                                                                     |
| 22 |                  |                      |                                                                     |
| 23 |                  |                      |                                                                     |
| 24 | Descriptive data | <a href="#">#14b</a> | Indicate number of participants with missing data for each 9        |
| 25 |                  |                      |                                                                     |
| 26 |                  |                      | variable of interest                                                |
| 27 |                  |                      |                                                                     |
| 28 |                  |                      |                                                                     |
| 29 | Descriptive data | <a href="#">#14c</a> | Summarise follow-up time (eg, average and total amount) 9           |
| 30 |                  |                      |                                                                     |
| 31 |                  |                      |                                                                     |
| 32 | Outcome data     | <a href="#">#15</a>  | Report numbers of outcome events or summary measures 9              |
| 33 |                  |                      |                                                                     |
| 34 |                  |                      | over time. Give information separately for exposed and              |
| 35 |                  |                      | unexposed groups if applicable.                                     |
| 36 |                  |                      |                                                                     |
| 37 |                  |                      |                                                                     |
| 38 |                  |                      |                                                                     |
| 39 |                  |                      |                                                                     |
| 40 | Main results     | <a href="#">#16a</a> | Give unadjusted estimates and, if applicable, confounder- 9         |
| 41 |                  |                      |                                                                     |
| 42 |                  |                      | adjusted estimates and their precision (eg, 95% confidence          |
| 43 |                  |                      | interval). Make clear which confounders were adjusted for           |
| 44 |                  |                      | and why they were included                                          |
| 45 |                  |                      |                                                                     |
| 46 |                  |                      |                                                                     |
| 47 |                  |                      |                                                                     |
| 48 |                  |                      |                                                                     |
| 49 |                  |                      |                                                                     |
| 50 | Main results     | <a href="#">#16b</a> | Report category boundaries when continuous variables were 9         |
| 51 |                  |                      |                                                                     |
| 52 |                  |                      | categorized                                                         |
| 53 |                  |                      |                                                                     |
| 54 |                  |                      |                                                                     |
| 55 | Main results     | <a href="#">#16c</a> | If relevant, consider translating estimates of relative risk into 9 |
| 56 |                  |                      |                                                                     |
| 57 |                  |                      | absolute risk for a meaningful time period                          |
| 58 |                  |                      |                                                                     |
| 59 |                  |                      |                                                                     |
| 60 |                  |                      |                                                                     |

|    |                          |                     |                                                                |       |
|----|--------------------------|---------------------|----------------------------------------------------------------|-------|
| 1  | Other analyses           | <a href="#">#17</a> | Report other analyses done—e.g., analyses of subgroups         | 9-10  |
| 2  |                          |                     | and interactions, and sensitivity analyses                     |       |
| 3  |                          |                     |                                                                |       |
| 4  |                          |                     |                                                                |       |
| 5  |                          |                     |                                                                |       |
| 6  | <b>Discussion</b>        |                     |                                                                |       |
| 7  |                          |                     |                                                                |       |
| 8  |                          |                     |                                                                |       |
| 9  |                          |                     |                                                                |       |
| 10 | Key results              | <a href="#">#18</a> | Summarise key results with reference to study objectives       | 11    |
| 11 |                          |                     |                                                                |       |
| 12 |                          |                     |                                                                |       |
| 13 | Limitations              | <a href="#">#19</a> | Discuss limitations of the study, taking into account sources  | 13    |
| 14 |                          |                     | of potential bias or imprecision. Discuss both direction and   |       |
| 15 |                          |                     | magnitude of any potential bias.                               |       |
| 16 |                          |                     |                                                                |       |
| 17 |                          |                     |                                                                |       |
| 18 |                          |                     |                                                                |       |
| 19 |                          |                     |                                                                |       |
| 20 | Interpretation           | <a href="#">#20</a> | Give a cautious overall interpretation considering objectives, | 13    |
| 21 |                          |                     | limitations, multiplicity of analyses, results from similar    |       |
| 22 |                          |                     | studies, and other relevant evidence.                          |       |
| 23 |                          |                     |                                                                |       |
| 24 |                          |                     |                                                                |       |
| 25 |                          |                     |                                                                |       |
| 26 |                          |                     |                                                                |       |
| 27 |                          |                     |                                                                |       |
| 28 | Generalisability         | <a href="#">#21</a> | Discuss the generalisability (external validity) of the study  | 10-13 |
| 29 |                          |                     | results                                                        |       |
| 30 |                          |                     |                                                                |       |
| 31 |                          |                     |                                                                |       |
| 32 |                          |                     |                                                                |       |
| 33 | <b>Other Information</b> |                     |                                                                |       |
| 34 |                          |                     |                                                                |       |
| 35 |                          |                     |                                                                |       |
| 36 | Funding                  | <a href="#">#22</a> | Give the source of funding and the role of the funders for the | 16    |
| 37 |                          |                     | present study and, if applicable, for the original study on    |       |
| 38 |                          |                     | which the present article is based                             |       |
| 39 |                          |                     |                                                                |       |
| 40 |                          |                     |                                                                |       |
| 41 |                          |                     |                                                                |       |
| 42 |                          |                     |                                                                |       |
| 43 |                          |                     |                                                                |       |

None The STROBE checklist is distributed under the terms of the Creative Commons Attribution License CC-BY. This checklist can be completed online using <https://www.goodreports.org/>, a tool made by the [EQUATOR Network](#) in collaboration with [Penelope.ai](#)
